# Supplementary material for: Unravelling the Mechanisms of Student Negative Emotions in Technology-Mediated Intermittent Dropout: A Mixed-Methods fsQCA Study
Source: Research Square preprint supplement (doi:10.21203/rs.3.rs-6971678/v1), 2025-09-08
Supplement: Supplementary file 1 [file 379691234ffc1249f25889cc.docx]

## Interview 1

00:00 Respondent 1

中辍行为。

Intermittent behavior.

00:01 Researcher

对就是嗯，有没有过你就是说，大概的都行。

Yeah, well, have you ever heard about that? I mean, anything is okay.

00:05 Respondent 1 Wang

因为我是以前疫情的时候，因为老是用那个职教云也比较多，然后还有那个QQ课堂上课也比较多这种。就是这种辅助软件，我感觉哪一个都行，我其实是没有这种综测的行为，但是有些同学可能会有这种行为，比如说他感觉到那个职教云，然后对自己使用比较方便嘛，然后有也有人感觉QQ课堂就是。嗯，QQ课堂的那个也比较方便。可能就是不太喜欢那个云课堂，因为云课堂的话感觉界面也比较那个。简洁了一些。

During the pandemic, I frequently used Vocational Education Cloud and QQ Classroom for classes. I found these auxiliary tools all quite useful. However, I don't engage in comprehensive assessments, but some classmates might find Vocational Education Cloud more convenient to use. Similarly, some people prefer QQ Classroom because it is also very convenient. Personally, I don't particularly like the cloud classroom, as its interface feels a bit too simple.

00:41 Researcher

嗯。哦。

Well... oh.

00:50 Researcher

还有什么要问的吗？稍等一下啊，大概要半个小时左右。

Is there anything else you want to ask? Wait a minute, it will take about half an hour.

00:56 Respondent 1 Wang

嗯，行。

Well, OK.

01:03 Researcher

嗯，那你就是在使，就是这个我们说在使用雨课堂的过程当中啊，存在这样的一个中辍的这个行为对不对？那么对，那你觉得有呃他这个行为啊，会不会受到一些情绪上面的一些影响，比如说有的人他可能会因为这个呃这个信息太多了，所以导致我这个就是不愿意去使用它。

Well, you are using it. This is the behavior we mentioned during the use of Rain Classroom, right? Yes, I think this behavior might be influenced by emotions. For example, some people might be unwilling to use it because there is too much information.

01:34 Respondent 1 Wang

呃，情绪对这方面肯定会有一些影响。啊，比如说疫情的，就是拿我的自身来说吧，比如说疫在疫情的时候，然后老师的时候就比较那个有些软件比较卡顿你知道吧，然后还有就是刚起床的时候，然后就是非常着急，然后就怕就是。嗯，就也比较急吧，就是因为可能自己起来的比较晚，然后老师这边签到也比较急，然后就可能慌慌张张。然后对于，然后云课堂呢，有可能就是软件打开的时候有一些问题，然后可能有一些负面情绪，比如说他非常着急，然后要又要打开这个软件，那可能就是出现一些问题吧。

Emotions definitely have an impact on this. For example, during the pandemic, when I was in class, the software would lag a bit. When I first woke up, I felt very anxious and worried because I had to wake up late, and the teacher's sign-in process was also rushed, which made me feel quite anxious. In the cloud classroom, there might be issues when opening the software, which could lead to negative emotions, such as feeling very anxious and trying to open the software, which might cause problems.

02:16 Researcher

那也就是说，呃是担心错过一些重要的呃节点，所以说你产生了这个害怕和担忧的这样的一个心理。对吧。

So that means, uh, you're worried about missing some important uh nodes, so you have this fear and worry. Right?

02:28 Respondent 1 Wang

嗯，对。

Well, yeah.

02:29 Researcher

呃。那我我下面将描述将将提供一些这个负面的一些情绪啊，你看看有没有过这样的类似的这样子的啊感受。比方说倦怠。焦虑。嫉妒。沮丧。压力。不满。或者我现在是不是多说太多了，我我我就三个三个的说吧，我说倦怠，焦虑和嫉妒。比方说我这个就是说呃这个信息太多了，所以我就懒得看的。还有焦虑，就是说，哎呀，这么多内容，哎呀，我怕我看不完，嫉妒。哎呀，我看到有的人分数90分，我每次都是60分，60分，60分就不想弄了。

Well, I will now describe some of the negative emotions that come with this. Have you ever felt any of these? For example, burnout, anxiety, jealousy, depression, stress, or dissatisfaction. Or maybe I've said too much; I'll just mention three: burnout, anxiety, and jealousy. For example, the information is overwhelming, so I'm not even bothering to read it. And anxiety, like, oh, there's so much content, I'm afraid I won't finish reading it. And jealousy, like, when I see someone score 90, and I always get 60,many times, so I just don't want to bother anymore.

03:19 Researcher

这三种情况有没有遇到过？

Have you ever encountered any of these three situations?

03:23 Respondent 1 Wang

呃，确实会存在一些问题，因为呢，比如说就是同学的分每次都比你高的话，你肯定心里也会产生很不满。然后，这个如果如果老师布置的作业，或者是这个就是内容非常多的话，同学是也是肯定是不愿意看的。也不是不愿意看，就是看的时候可能比较烦。但是你有可能也会看完。

Indeed, there are some issues. For instance, if your classmates consistently score higher than you, you might feel quite dissatisfied. Moreover, if the teacher assigns a lot of homework or the content is extensive, your classmates might not be willing to read it. It's not that they don't want to read it, but they might find it tedious. However, you might still finish reading it.

03:48 Researcher

嗯，那你觉得就是就是老师布置的任务太，老师布置的就是那等于课堂课堂任务过载就是课堂任务过载嘛，其实其实就是太多的太多的那种课堂任务嘛，对吧，你没有办法完成对不对。这个呃，我们就说课堂任务过载，课堂任务过载的话，你觉得这是一种倦怠还是一种焦虑呢？是因为倦怠还是因为焦虑所产生的？就是说你不愿意去使用云课堂？当你面对太多的任务的时候。

Well, you think the tasks assigned by the teacher are too much. The tasks assigned by the teacher are essentially classroom task overload, which means there are just too many classroom tasks, right? You can't possibly complete them all, can you? So, when we talk about classroom task overload, do you think it's a case of burnout or anxiety? Is it due to burnout or anxiety? Do you feel unwilling to use the cloud classroom when faced with too many tasks?

04:22 Respondent 1 Wang

应该是焦虑多一些吧，如果如果老师布置的任务非常多的话，可能就是自己也担心完不成，可能有些焦虑的状态，更多的成分在嗯好。

I think it's more anxiety. If the teacher assigns a lot of tasks, maybe I'm worried that I can't finish them, maybe there's a little bit of anxiety.

04:36 Researcher

嗯，好的。那么下面我再说3种啊，就是沮丧、压力，还有不满意。嗯，沮丧，沮丧的话很好理解嘛，就是别人90分啊，你60分我我我这个这个结局让我很难以接受是吧，我感到自我感觉到很沮丧，所以我就放弃了，我就不愿意参加对吧。不愿意参加我的语课堂的各种各样的这个活动，那么还有压力，就是说这个。那个压力的有可能是来自于老师的，比方说这个任务本身很难啊，还有可能是来自于我们的同辈的啊。总之啊，无论是来，无论它的来源来源如何啊，总之就是这个在使用语课堂的过程当中给你带来了一种压力的感觉，以至于你放弃就是中辍。他们好像不在意我是否上课。

Alright, let me add three more: frustration, pressure, and dissatisfaction. Frustration is quite straightforward. For example, if someone else scores 90 and you only get 60, it's hard to accept this outcome, right? I feel very frustrated, so I give up and don't want to participate in the activities of the language class. Another source of pressure could be from the teacher, such as a particularly challenging task, or from our peers. In short, no matter what the source, the pressure from using the language class can make you feel so overwhelmed that you might give up or drop out. And I feel that they do not notice whether I disappeared or not.

05:33 Researcher

重挫，还有就是不满意。啊不满意，你觉得这个这个软件就是压根儿就不好用啊，是卡顿的也好呀，或者说是呃跟同类软件相比啊，总是这个就是呃或者是界面设计啊，不够智能化呀，不够人性化呀啊总而言之，你你对它的产生了呃呃产生了负面的评价的。嗯让你不满意，以至于你放弃去使用它。这3种情况你有没有？

Drop out in performance, along with dissatisfaction. You find the software to be fundamentally unuseable, whether it's lagging or not. Compared to similar software, it often lacks intelligence and user-friendliness in its interface design. In short, you have developed a negative opinion of it, leading to your decision to stop using it. Do you experience any of these three situations?

06:04 Respondent 1 Wang

呃，局丧，我就拿我的室友来说吧，比如说我那个室友，然后他就是感觉自己呃，然后老师不是让做一个视频嘛，就是剪辑一个视频，然后他每次都感觉自己剪的不错。然后等到老师老师打分出来的时候，就是还不如比如说他辛辛苦苦在那做了一个一个多小时，然后另一个同学就是他只做了十几分钟，然后就把这个视频剪辑完成之后，然后老师打分出来的时候发现。就是那个做十几分钟的那个学生的成绩，要比他这辛辛苦苦做一个多小时剪辑的视频的分还要高。

For example, let's talk about my roommate. He felt that the teacher asked him to make a video, so he thought he did a good job every time. However, when the teacher scored the videos, it turned out that the student who only worked for about ten minutes scored higher than the one who spent over an hour editing.

06:39 Respondent 1 Wang

如果一次两次这种情况，他可能他可能会接受。但是如果长此以往的下去的话，他可能就会产生一些沮丧的这些心理活动吧。

If this happens once or twice, he may accept it. But if it goes on for a long time, he may have some psychological activities of frustration.

06:49 Researcher

嗯。啊对沮丧，所以他他那他就是产生了这种心理活动以后，他就会拒绝使用这个雨课堂是吧，或者说比较抵触了对吧？

Um-hum. Ah, right. So he's depressed, so he has this kind of mental activity and then he refuses to use the rain classroom, right, or is resistant to it, right?

07:01 Respondent 1 Wang

他不是就是拒绝使用云课堂，也可能也是说，嗯，也有可能是拒绝老师完成的任务，可能反正可能都有吧。

He either refused to use the cloud classroom, or maybe he refused to do what the teacher asked him to do, or maybe he did both.

07:09 Researcher

反正就是我不想再再再使用这个信息化的这个这个软件了，或者说这个这个工具平台了。是吧。

Anyway, I don't want to use this information software again, or this tool platform again. Right?

07:17 Respondent 1 Wang

啊对，嗯。

Oh yeah, well.

07:19 Researcher

呃，压力和不满意有有过吗？不满意，因为你刚刚提到过，就是说你觉得雨课堂没有同类产品方便，比方雨课堂没有职教云好用。

Uh, have you ever felt stressed and dissatisfied? Dissatisfied, because as you just mentioned, you think that Rain Classroom is not as convenient as similar products, for example, Rain Classroom is not as easy to use as Vocational Education Cloud.

07:31 Respondent 1 Wang

呃，可能和习惯有些关系吧，因为我就是每个人的习惯都不一样。可能就是有些人他就是啊，我就我来说吧，我感觉去看房其实也挺好用的。

Well, maybe it has something to do with habits, because everyone's habits are different. Maybe some people just do it, but I think it's actually good to go to a house.

07:44 Researcher

嗯。啊不呃，那就是你不存在这个不满意的情况，也也不存在因为压力和不满意这个不使用它的情况对吗。啊对哦OK，好，下面我们来看啊，就是失望抑郁。呃，失望，抑郁，还有担忧。啊失望嘛，比方说就是。我们那个语课堂里面有有功能就是呃可以评价对吧。啊，你发现你啊类似于我我。呃，我我写了一篇很好的英语文章，我发到雨课堂的这个老师的这个任务当中了，结果呢，我发现呃对我这个评价呢。呃，没有达到我的期待。让我很让我感觉到很失望，失望。

Hmm. Ah, no, uh, that means you don't have the dissatisfaction situation, and you also don't use it due to pressure and dissatisfaction, right? Ah, yes, OK, let's move on to disappointment and depression. Uh, disappointment, depression, and worry. Ah, disappointment, for example, in our language class, there is a feature that allows us to evaluate, right? You found that you are similar to me. Uh, I wrote a good English article and posted it as a task for the teacher in the Rain classroom, but the evaluation I received did not meet my expectations, which made me feel very disappointed.

08:40 Researcher

那么抑郁的话就是。感觉就是在在使用雨课堂的过程当中哈，你会不自觉的啊，有意或者无意的将自己与他人进行一个比较。啊在比较过程当中，你觉得自己不如他人。让你产生了这种的负向的心理上的，呃感受抑郁啊，然后担忧啊担忧啊担忧就是说。那么。呃，在老师布置的这个云课堂的这个课堂讨论当中，对吧，我们知道我知道有些同学学习成绩比较好啊，我害怕自己说错话。害怕自己说的不好，有没有过这3种情况，就是失望、抑郁和担忧。

When feeling depressed, it often means that during the use of Rain Classroom, you might unconsciously compare yourself with others, either intentionally or unintentionally. In this comparison, you may feel inferior to others, leading to negative psychological feelings and depression. This can also lead to worry and anxiety. In the cloud classroom discussion assigned by the teacher, some students have better academic performance. You might fear saying something wrong or not speaking well enough. Have you ever experienced these three situations: disappointment, depression, and worry?

09:31 Respondent 1 Wang

呃，失望是有的，然后那个担忧也会有，然后那个群那个。抑郁是没有。

Well, there's disappointment, and then there's that worry, and then there's that group. Depression is not.

09:38 Researcher

嗯，那失望有哪些哪些表现呢？

Well, what are the signs of disappointment?

09:46 Respondent 1 Wang

呃，失望就是比如说，感觉是这个做题吧，就是感觉自己做的比较良好的情况下，然后系统不是有个自动评分系统吗？比如说，老师给了一个10道题，然后自己感觉还不错。然后就是答案一出，就是那个自动那个评分系统一出来，然后那个结果是。有些失望吧，对一些结果比较失望。

Disappointment, for example, can happen when you feel you did a good job on a test. There's an automatic scoring system, right? For instance, the teacher gives you 10 questions, and you think you did pretty well. But once the answers are released and the automatic scoring system shows the results, you might feel disappointed with some of the outcomes.

10:12 Researcher

啊，也就是系统评分这个结果是低于自己的预期的对吧。

Ah, so the system score is lower than I expected, right?

10:17 Respondent 1 Wang

嗯，对。

Well, yeah.

10:18 Researcher

嗯，那就是那这个系统评分结果，你指的是我们在使用语课堂或者是类似的这样子的信息化教学工具。呃，进行课堂教学的时候，或者是开展教学活动时候所带来的吧。嗯，对哦，OK. 好，你刚刚还提到了，就是有担忧，对不对？是不是对那个。

Well, that's the system's evaluation result you mentioned. You're referring to the impact of using language classrooms or similar information-based teaching tools in classroom instruction or teaching activities, right? Yes, OK. You also mentioned earlier that there are concerns, right? Is that correct?

10:45 Respondent 1 Wang

你云课堂不是有那个在线点名那个那个功能吗？然后就是比如说，那个老师就是请同学回答一道问题。然后有可能就是他自己可能上课走神了，没注意听。然后非常也有可能就担心老师会提问到自己。

Isn't the online attendance feature a part of your cloud classroom? For example, a teacher might ask a student to answer a question. However, the teacher might be distracted during class and not pay attention. There's also a possibility that the teacher is worried about being called on.

11:05 Researcher

AG.那就是担心这个被。担心被这个课堂在线点名功能所提问是吧？

AG. So you're worried about being called out in class?

11:25 Researcher

好。然后。剩下两种就比较容易理解了，一个是气氛。一个是紧张。嗯，就是说看到有些人发的一些信息啊，或者是一些内容，让你感觉到很气愤，对吧，比方说啊。那么紧张，我举个例子啊。呃呃，看到别人的完成的这个作品，或者是别人的一些一些表现的时候。呃。

Alright. Then, the remaining two are relatively easier to understand: one is the atmosphere, and the other is tension. For example, when you see some messages or content that make you feel very angry, right? And then, tension, let me give you an example. When you see someone's completed work or their performance, for instance.

11:58 Researcher

呃，很期待对吧，很期待别人的一些点评或者是评价。啊，这种感觉呢，让自己精神紧绷。又是气愤和紧张。

Well, I'm looking forward to it, right? I'm looking forward to some comments or evaluations from others. Ah, this feeling makes me nervous. It's anger and tension again.

12:11 Respondent 1 Wang

这个紧张应该是没有。

There should be no tension.

12:14 Researcher

嗯。气愤呢。

Well, anger.

12:18 Respondent 1 Wang

气氛，呃，比如说同学就是比如说同学互评的话，它还有一个就是同学互评的那个功能嘛，然后比如说你这你你剪辑出来一个视频，然后或者是你写了一篇文章给。其他同学看，然后其他同学就是不知道是有意还是无意的，就把你的分打的很低的那种，然后。你的评语也不是太好，可能会让自己产生一些气愤。

For example, when classmates evaluate each other, there is a feature for peer review. If you create a video or write an article and share it with your classmates, they might, intentionally or unintentionally, give you a low score. Your comments are also not very positive, which can make you feel angry.

12:45 Researcher

嗯？

Hmm?

12:52 Researcher

啊，也就是说在同学互评当中被恶意打低分是吧，这种情况让你。嗯，感到很气愤是不是？啊，对，对吧。

Oh, so you were given a bad grade in the peer review, right? Well, did that make you angry? Oh, yes, right.

13:13 Researcher

那你会不会有过那种。嗯，长时间不用这个就是说你你你刚才我们刚刚所说的这个，就是说你不用这个信息化的这个工具，或者说你内心抵触使用信息化的工具啊。呃，我们都算作。你的这个中辍。就是这种的频率大概会有多高呢？

Have you ever experienced this? Not using it for a long time means you haven't used the information tools we just discussed, or you have an inner resistance to using these tools. We all consider this as a form of disengagement. How common is this?

13:42 Respondent 1 Wang

频率感觉还好吧，因为这个使用软件也比较方便，既方便老师也方便了同学。然后，比如说老师布置一些作业，然后还有一些测试，比较及时和方便的完成。然后也不需要呃那种学习委员，然后去把亲自把那个作业收上来，然后再给老师检查这。这个中硕行为应该是。概率应该是很小的。

The frequency feels good because the software is quite user-friendly, making it convenient for both teachers and students. For example, when teachers assign homework or conduct tests, these can be completed promptly and conveniently. There's no need for a study committee member to collect and check the homework for the teacher. This behavior is likely to have a very low probability.

14:08 Researcher

OKOK, 好的，谢谢。

OK, ok, thank you.

## Interview 2

00:00 Researcher

就是你会不会认为，就是说我们人类在学习的过程当中啊，总有一些负面的情绪，这些负面的情绪会左右或者说是影响我对于这个高科技，呃信息技术的这个使用。你有没有，你你你有没有过这样的认同。

That is, do you think that in the process of learning, there are always some negative emotions, which will influence my use of high technology, uh, information technology? Have you ever had such an identity?

00:21 Respondent2

就是学网课吧就是。就那个点不会有，但是就是很烦，然后就不想再接触到那个点。

Just take online classes. There's no point in it, but it's so annoying that I don't want to touch it anymore.

00:29 Researcher

OK, 那好，那么下面我来给你提几个呃提几个情绪，然后你看看你的这个表现是什么啊？有呃，如果有的话你就提供，如果没有的话，你就如实告诉我，就没有OK，好吧。我们我们三个三个讲吧。就是。相个当个讲，或者是一个一个讲也行啊，要不然讲多了到时候也不行，第一个我们说是倦怠，倦怠嘛，就是很好说，就是说呃。比如说啊，比如说我以我以微信为例啊，我以微信为例，比方说微信里面有很多信息，所以。太多了，跟我也没什么关系，所以我就不看了。就倦怠了。你有没有过这种体会？就是因为倦怠，所以我不想用这些什么雨课堂呀，这些东西，我我都不想用。

Alright, so, let me give you a few emotions to consider, and then you can tell me how you react. If you have any, please share them; if not, just tell me the truth. Alright, let's go through this together. We can discuss them one by one or all at once, but too much at once won't be helpful. First, let's talk about burnout. Burnout is quite easy to describe. For example, if I use WeChat as an example, there's a lot of information on it, so it's overwhelming, and since it doesn't really concern me, I don't bother with it anymore.I'm tired of it. Have you ever felt that way? Because I'm tired of it, I don't want to use these rain classes or anything like that. I don't want to use anything like that.

01:20 Respondent2

这个没有该用还是得用，就是完就感觉就像完成任务一样。

This one has to be used, even if it doesn't have to be used. It just feels like a task is done.

01:26 Researcher

嗯，好，那么看第二种，第二种情绪就是焦虑啊，焦虑加上呃很多人呃都会积极的，比方说参与各种活动。嗯，我没有，所以一看到他们都在弄对吧，因为他都有反馈的嘛。嗯，所以我感觉到内心的很不舒适，然后产生了焦虑。焦虑会。会让你放弃使用吗？

Alright, let's look at the second type of emotion. The second type is anxiety. Anxiety can make many people more proactive, for example, by participating in various activities. I don't, so when I see them all doing it, they are getting feedback. This makes me feel very uncomfortable inside, leading to anxiety. Would anxiety make you give up using it?

01:54 Respondent2

不会就是我会尽量的参与一下吧，就是能参与的参与就是实在如果不行的话就可以就是换。

if I can't do it, I will try my best to participate. If I can participate, I will participate. If not, I can change.

02:03 Researcher

那就焦虑是没有对吧，好。第然后下面是季度。啊比方说有的人他这个回答问题回答的非趁。啊，总是100分，而我总是3分。我很嫉妒他，嫉妒。

Anxiety is not the right answer, right? Alright. Then there's the jealous. For example, some people answer questions very well. They always get 100 points, while I only get 3. I'm so jealous of him.

02:23 Respondent2

那应该没有吧，就是很现实呀，就是你不会就是不会，别人好就是好啊。

I don't think so. It's very realistic. You can't do it, but others are good.

02:29 Researcher

嗯，没有是吧，好沮丧。就是说比如说啊，我们说这个。就是看到别人的一些表现之后。啊，你会感觉到莫名其妙的很沮丧啊，或者心里感觉不好。

Well, no, right? It's so frustrating. It means that when we see someone else's performance, you feel inexplicably frustrated or bad in your heart.

02:50 Researcher

也不会是吧？你，你这些都要如实回答我啊。知道吧，你一定要如实回答我，因为我会这个事情是保密，我不会跟第三个人说。而且，我这个是仅做于这个学术研究。哦。OK啊好，下面一个就是压力。的压力啊嗯，叭方说这个，我比方说啊，有些人总是发布一些负面的信息啊，我呢，总很容易很容易受到外界的影响，这就让我感觉到很有压力。你会不会有这样情况？

It won't be like that, right? You, you must answer me truthfully. You know, you must answer me truthfully because I will keep this matter confidential and won't tell a third person. And, this is only for academic research. Oh, OK, good. The next one is about pressure. Pressure, um, for example, some people always release negative information, and I am easily influenced by the outside world, which makes me feel very pressured. Do you have similar experiences?

03:27 Respondent2

不会。如果那个人跟我没关系的话，应该不会，如果有关系的话，可能就会有一点影响。

No. If that person has nothing to do with me, it probably won't, but if there is a connection with me, it might have some effect.

03:33 Researcher

那比方说就是说我在呃我们发布了这个呃教学任务，比如说我我们我我让大家去做一个brainstorm对吧？那么有的人他回答的很快啊，很快就就就就答出了，虽然他也是这个发散型的。但是呢，他很快就打出了，而且呢，得到了老师的这个赞赏和认可。他的这种行为让我感觉到很有压力。所以我就不想用这个什么。嗯。会不会有货？

For example, when we released this teaching task, we asked everyone to brainstorm. Some people answered quickly, even though they were also divergent thinkers. However, they quickly provided their answers and received praise and recognition from the teacher. This behavior made me feel very pressured. So, I don't want to use this method. Will there be any more?

04:06 Respondent2

感觉好厉害。

It feels awesome on the peer performance.

04:08 Researcher

有是吧，那你的表现是什么呢？或者原因是什么呢？

Yes, so what was your performance? Or what was the reason?

04:14 Respondent2

原因就是因为可能我不是很懂，但是我就很羡慕。就羡慕，不是嫉妒啊，羡慕他走就是，但是也没太大压力。

The reason is that I may not understand it very well, but I envy him. I envy him, not jealous of him, just because he walks away, but I don't have much pressure.

04:25 Researcher

羡慕啊，羡慕什么呢？羡慕别人的什么呢？

Envy, what are you envious of? What are you envious of others for?

04:31 Respondent2

他的知识面可能比我更广，就是了解的比我更多。

He may know more than I do, but he knows more than I do.

04:37 Researcher

哦。

softly chant 。

04:49 Researcher

那也就是因为羡慕别人的这个广泛的知识面和知识结构，所以你会产生到些许的这个压力，而放弃使用这个。啊，信息化的这些工具对不对。

That's because you envy the amount of knowledge and structure that others have, so you feel a little bit of pressure to give up using it. Ah, these tools of information, right?

05:04 Respondent2

那么放弃吧。

So give up.

05:06 Researcher

就是中辍，我我们说就是用简单的说就中辍，就是说就是你现在不用，但是过段时间你还会用起来。会的话好，那么下面一个就不满意。不满意啊。葛末。你不满意的原因有很多，比如说有的时候就是比方说老有的时候老师发很多的这个消息啊，哗哗哗好多。嗯，那我觉得不太舒服。或者就是说这个系统它推送了很多的这个任务，让我觉得不满意。啊。

It's about the intermittent dropout. To put it simply, it means you're not using it now, but you will use it again in the future. If you can use it, that's great; otherwise, it's not satisfactory. There are many reasons for dissatisfaction. For example, sometimes the teacher sends a lot of messages, which can be overwhelming. I feel uncomfortable with this. Or the system pushes a lot of tasks, which makes me dissatisfied.

05:40 Respondent2

就是这个是那个吧。

This is that and that.

05:44 Researcher

这个会用吗？

Will this work?

05:46 Respondent2

没有。

not。

05:47 Researcher

没有啊。那就第下面一个就失望。是吧啊比如说啊，我们的那个所有的教学活动都是可以都可以打分的嘛。那么，你可以看到有的人他那个分数啊很高，但是自己的呢很少有人点评或评论，就是挺失望的。慢慢的，你也就不想再参与了。

No. Then you might feel disappointed with the next one. For example, all of our teaching activities can be scored. You might notice that some people have very high scores, but few others provide feedback or comments, which can be quite disappointing. Gradually, you might lose interest in participating.

06:17 Respondent2

没有，我觉得很正常，就是有些人，比如通过那个健身卡很正常啊。就比较接受自己就是没那么出彩是吧。

No, I think it's normal. It's just that some people, are normal. They're more comfortable with themselves not being so great, right?

06:27 Researcher

嗯，行，我我还是说啊就是。就是我这我们这个我们这个不是像。其他的一些任务呀，就是说你一定要回答的很完美啊，不是这样的，我是需要得到一个真实的一个情况，知道吧。一定是你真实的一个感受，你知道吧，啊不是像有的时候老是说哎呀，现在现在东西好不好呀啊哪怕不好你也说好啊，不是这样子的啊。

Well, I still think it's like this. It's not about giving a perfect answer to other tasks; it's about getting a genuine situation, you know. It's about your true feelings, you understand? It's not about always saying things are good or bad, even if they're not.

06:54 Respondent2

没有没有。

No, no.

06:55 Researcher

好，下面一个就是抑郁。啊，抑郁就是。呃，比如说我们的一个一个的教学任务啊叭，如说一个教学任务，那么这个任务发布，任务发布完之后啊，可能有些同学可能错答了，然后呢，你通过啊有意或者无意当中的有形或者无形当中的这个比较。啊，你会发现自己不如他人。

Alright, the next one is depression. Depression, for example, in our teaching tasks, such as a specific task, after the task is released, some students might give incorrect answers. Through intentional or unintentional comparisons, you might find yourself not as good as others.

07:23 Researcher

抑郁，抑郁有过吗？

Depression, have you ever had it?

07:28 Researcher

抑郁也没有是吗？那么有的人呢，他觉得这个呃会害怕，那他就会说什么，他这个嗯，比如说他他自己的这个呃作答的时候，他发出去的语音啊，或者是打的这个句子不够标准，所以产生了一个害怕啊。然后因为这个害怕呢，他就不愿意去参加这样的活动。我们不愿意使用这样子的这个信息化的技术，但是他可能如果说是不用信息化的技术，面对面他可能会更好啊，这种行为你怎么看待呢。

Does depression also exist? Some people, when they feel afraid, might speak in a way that is not very standard, such as their voice or sentences, which can make them feel afraid. Because of this fear, they are unwilling to participate in such activities. We are reluctant to use such information technology, but if we don't use information technology, face-to-face interactions might be better. What do you think about this behavior?

08:10 Respondent2

~~你小英。~~

~~You Xiao Ying.~~ (听不清楚说什么)

08:14 Researcher

或者说你自己有过这样子的类似的经历吗？

Or have you had a similar experience?

08:19 Respondent2

自己本身没有。

I don't have it myself.

08:21 Researcher

你自己完全没有是吧？好。那么。啊比如说我们的这一个。这个讨论啊呃里面那么有些人呢，呃里面里面有些人是我知道的，他的水平比较好啊啊知识面可能比较广，所以他的这个呃我就担心呢自己的。呃。呃，担心自己的这个。担心自己这个回答啊不够好。所以有时候害怕。

You're not completely experienced, right? Alright. So, for example, in this discussion, there are people I know who are quite knowledgeable and have a broad knowledge base. This makes me worry that my answers might not be good enough. Sometimes I feel afraid.

09:06 Researcher

有过这种害怕的这种感受吗？

Have you ever felt this kind of fear?

09:10 Respondent2

话会有一点点，但是不影响我自己回答这个问题。

There will be a little bit of talk, but it won't stop me from answering the question.

09:16 Researcher

那么害怕的原因是什么呢？

So what's the reason for the fear?

09:21 Respondent2

啊就是不会就是不是那么完美，就没有别人完美，就是那个意思。

That's right. It's not perfect. No one is perfect. That's the point.

09:40 Researcher

那就是担因为，因为自己不会和我和不完美，所以担心自己不够好是吧？

That's because I'm not perfect, and I'm worried that I'm not good enough, right?

09:49 Researcher

就担心自己的表现不够好。可以这么说吧，好的。那下面就是单哦。我刚才说错了，应该是担忧，我刚才说的是担忧。你刚你刚才应该是说是回答的担忧啊担忧，然后下面一个就是气愤，对吧，气氛。但是有些人，有些人他把我想说的话发掉了，让我很气愤。

I was worried about my performance not being good enough. To be precise, I was worried. What I said earlier was that I was worried. You were supposed to respond to my concern, and then the next point is about the angry, right? However, some people have posted what I wanted to say, which made me very angry.

10:21 Researcher

那么经常。紧张啊。Uh.就是发完你有没有过就是说自己做完这个提交过答案之后，很嗯期待的别人的这个评价。让自己感到有点紧张。

It happens all the time. It's stressful. Uh, after you finish, have you ever felt a bit nervous about what others will say after you submit your answer?

10:43 Respondent2

不太会织这个不太会不太会是吧。

I don't know think this will affect me.

10:46 Researcher

那么我想问你，就是你之前说过的啊，就是因为你啊，因为你会突然失去兴趣，所以你会完全不用。这个。信息化工具对不对？那你这个。

So I want to ask you, as you said before, because you will suddenly lose interest, so you will not use it at all. Right? So the information tool, right?

11:00 Respondent2

嗯。

Well.

11:02 Researcher

那你这个突然失去兴趣是。是为什么会突然失去兴趣？你之前说的是懒懒，就是比较抽象，你能够具体一点吗？是因为什么原因导致的吗？

So you suddenly lose interest. Why do you suddenly lose interest? You said before that it was lazy, which is more abstract. Can you be more specific? What caused it?

11:23 Researcher

这个这个东西最好是跟自己的情绪啊，这个是有关系的。

This thing is best with your own emotions, this has something to do with it.

11:41 Researcher

(waiting for responding)

11:43 Respondent2

后期就离开。好意思往是。

Then left later.

11:46 Researcher

嗯，什么？我听得不是很清楚，刚才信号不好，你说什么啊？

Well, what? I didn't hear you very well. What did you say?

11:51 Respondent2

跟我负面情绪没什么关系。

It is not connected with my negative emotion.

11:54 Researcher

哦，那你就是为什么会突然间失去兴趣呢？

Oh, so why did you suddenly lose interest?

12:00 Respondent2

懒。

lazy.

12:05 Researcher

呃，你觉得就是因为自己懒是吗？那你这样子的情况，呃，如果不是那种信息化的教学的课程。呃，你也会中中戳吗？

Well, do you think it's because you're lazy? Well, in your case, if it wasn't for the information-based teaching curriculum, well, would you have been intermittent dropout?

12:22 Respondent2

就比如说平时的课堂教程吗。

Take a regular class, for example.

12:24 Researcher

课堂嗯，假如说是课堂教学，那不用我不使用信息化，我就面对面的。

Classroom Well, if it's classroom teaching, then I don't have to use information technology, I just have face-to-face teaching.

12:31 Respondent2

面。老师讲的很无趣的话，就那个点，我不承认，不喜欢了就不会就是很认真的听着。

The teacher's boring words, just that knowledge, I don't admit it, if I don't like it, I won't listen very carefully.

12:42 Researcher

呃，那个点让你不喜欢，那也就是你你是因为对。那个点老师所讲的那个点不满意，所以你会失去兴趣对吗。

Well, if you don't like that knowledge, then it's because you're not satisfied with the point the teacher said, so you lose interest, right?

12:55 Respondent2

对。

Yes.

13:18 Researcher

那也就是说，你认为这个课程设计不够合理，所以让我失去了这个学习下去的兴趣和动力，对吧？可以这么理解吧。

That means you think the course design is not reasonable enough, so I lost my interest and motivation to continue learning, right?

13:30 Respondent2

不合理吧。

It's not reasonable.

13:31 Researcher

是我对不不是不是不是不是不是不是不是你听我说啊，你我说我我我们现在所说的都是围绕着你自己的个人感受，就是这个合理不合理完全是你自己的感受。你觉得合理就是合理，你觉得不合理它就是不合理。不管他不管他设计的到底合理不合理。明白吧。就是我觉得这个事情。哪怕它是这个国家级的这个成果，但是我依然认为它这个设计的没有达到我的预期。我就认为它不合理。

I'm telling you, listen to me. What we're discussing now all revolves around your personal feelings—whether it's reasonable or not is entirely up to you. If you think it's reasonable, then it is; if you don't, then it isn't. Regardless of whether the design is reasonable or not. Got it? Even though this is a national-level achievement, I still believe its design falls short of my expectations. I find it unreasonable.

14:09 Researcher

是吧。

Yeah？

14:10 Respondent2

对。

Yes.

14:12 Researcher

Oh.对。那么这么看来，你大部分的还是因为就是来自于压力，不满意，还有一些担忧所导致你失去了学习的兴趣的？

Oh, right. So it seems that most of your loss of interest in learning is due to stress, dissatisfaction, and some concerns?

14:29 Researcher

对呀，你分析出来结果就是这样子的。

Yeah, that's what you came up with.

14:31 Respondent2

嗯。

Well.

14:32 Researcher

就就是说你你会你你会有一些对于别人的，呃，因为你会羡慕一些别人的这个广泛的一些知识结构，然后给你带来了一些压力，你也会认为课程结构那些不合理。还要担心自己的不够好。然后让自己失去兴趣。所以说你的你的问题，其实你你就是你个人对于一个课程的啊，一个课程的评价其实就来自于。啊，我课堂课堂教学的一个体验是来自于就是同学啊课程设计以及，呃自己的前置知识这三个方面。

It means that you might envy others for their extensive knowledge, which can put pressure on you and make you feel that the course structure is unreasonable. You may also worry about your own inadequacies, leading to a loss of interest. Therefore, your issue actually stems from your personal evaluation of a course, which is based on three aspects: my classroom teaching experience, the course design, and my prior knowledge.

15:14 Researcher

那这就是我们交流出来的结果，对吧，所以我说这个我们这是一个，这是一个纯学术纯理论的这么一个沟通和交流啊，所以说，呃，一方面是我收集一些。呃，加深一些了解，另一方面你自己也对自己有一个，有一个有个新的认识。

So this is the result of our communication, right? So I said this is a pure academic and theoretical communication. On the one hand, I am collecting some information to deepen my understanding, and on the other hand, you also have a new understanding of yourself.

15:35 Respondent2

这新面就是，哎哟。

This is the new face, oh my God.

15:37 Researcher

对，但是其他的你就没有，你不你不存在什么焦虑啊，嫉妒啊，沮丧啊，这些你都没有啊，你不会因为什么焦虑抑郁，沮丧失慌害怕而而而产生对于这个而而产生这个拒绝这个使用这个。嗯，新技术的这个理由，嗯，这些都是不成立的。Uh.对吧。嗯。

Yes, but you don't have any of the other issues. You don't experience anxiety, jealousy, or depression. You won't feel anxious, depressed, or panicked, and you won't refuse to use this technology because of these feelings. These reasons for rejecting new technology are not valid. Uh. Right? Uh.

16:02 Respondent2

对。

Yes.

16:04 Researcher

嗯。

Well.

16:08 Researcher

好，总体来说，我们这个访谈学习任务，基本上我的我的小调查任务基本上就到此结束了。那告一段落了，后期可能我还会让你们去做一个问卷。哦。后期还会可能让你去做一个问卷，嗯。嗯，总体就是这个样子的，嗯。你最近还好吧？啊，我说你最近还好吧。

Alright, overall, our interview and learning task has basically concluded my short time survey. That's the end of this phase. Later on, I might ask you to complete a questionnaire. Oh, later on, I might also ask you to complete a questionnaire. Well, that's about it. How have you been recently? Ah, I was just wondering how you've been.

16:38 Respondent2

啊，最近还好还好还好。

Oh, it's been okay, okay, okay.

16:39 Researcher

嗯，那就行那就行，嗯。那这啊这最后一句话就是客套一下啊啊说吧，嗯嗯，之前的话我们是学习做是做做学术研究啊。不做学术研究啊嗯。那行那就那就暂时就先这样吧。嗯，好辛苦你好好好，拜拜，嗯。

Alright, that's fine, alright. The last sentence is just for formality, alright. We were previously focused on academic research. We won't do academic research anymore. Alright, let's just leave it at that for now. Well, you've worked so hard, take care, bye.

## Interview 3

(The initial recording is lost)

00:00 Researcher

啊有些功能我就不使用它了。哦。啊不是呃第一种机啊对对，有些功能我就不使用它，第二种的话就是。呃。就说我有一段时间就没有使用这个我们的信息化的工具，比方说这个雨课堂。啊，而且我这个说的一定是你就是内心里面你就不愿意使用它啊，虽然说有的时候因为我们上课嘛，你没有办法，老师说啊，你必须得要用对吧，你没有办法，你你你是个好学生说那我就必须得要用啊。但只要说你内心里面出现了这种波澜，我们都认为在我的这个领域里面啊，就是现在我们要讨论的话，这个话语环境下面的话，它都属于那种间断，明白我的意思吧。

For example, I haven't used this information tool for a while, like Rain Classroom. And what I'm saying is that you're not willing to use it, even though sometimes in class, as a good student, you have no choice but to use it because the teacher says you must. But whenever there's a conflict in your heart, we all believe that in our field, under the current discourse environment, it all falls into the category of interruptions. Do you understand my point?

00:48 Researcher

啊。就是我有段时间我间断。我中处还有一种情况，就是说我会暂时的暂停一下，然后等到我有需要的时候，我再去使用它。这3种情况你有过吗？

Ah, that's when I take a break for a while. Another situation is that I will temporarily pause and then use it when I need it. Have you ever had any of these three situations?

01:02 Respondent 3

有过。

It's been done.

01:03 Researcher

有过，你是属于哪一种？

Have you? Which one are you?

01:06 Respondent 3

嗯。

Well.

01:06 Researcher

第一种就是说有些功能我会，嗯，下意识的我会屏蔽它，我就不用它对吗。

The first one is that there are some functions that I know, and I subconsciously block them, so I don't need them, right.

01:15 Respondent 3

对嗯，或者说是没有注意过。

Yeah, or not paying attention.

01:21 Researcher

嗯，什么叫没有注意过。

Well, what does it mean to not pay attention?

01:25 Respondent 3

就是嗯，因为没有全面的了解过他，然后有时候就只会用一些功能。

Well, because I didn't know it well enough, and sometimes I just used some features.

01:47 Researcher

也就是说，你就是由于。呃，缺乏全面的了解，所以你比较局限于比较熟悉的，熟知的一些功能对吗。对吧，所所以对于那些不熟的啊对于。呃，不熟悉或者是较陌生的。啊，他们那些你就设置为这个屏蔽掉对吧。

In other words, due to a lack of comprehensive understanding, you tend to focus on the functions you are familiar with. Right? So, for the less familiar or unfamiliar ones, you would set them to be blocked, right?

02:15 Respondent 3

对。

Yes.

02:29 Researcher

啊，屏蔽。好，那么。接下来啊嗯，就是说你有没有这么认同，就是我们那个学习，它不光是一个智力过程，有的时候也是一个。这个情绪受情绪影响的一个过程，就是说有的时候你会发现，哎我学某样东西，或者是学呃或者是了解某个知识。哦，我会受到这个情绪或者感情的影响。嗯，是在类似于课堂的课件里面使用的时候吗。呃，就是类，就是在我们使用这个我们高科技的信息化的教学工具的过程当中。你你是否会受到情绪，特别是负面情绪的一些影响？

Ah, blocking. Alright, so. Next, you might agree that learning is not just an intellectual process; it can also be influenced by emotions. Sometimes, when you learn something or gain knowledge, you may find yourself being affected by your emotions or feelings. Well, when it's used in a classroom-like courseware. Uh, it's the class, it's in the process of using this high-tech information-based teaching tool. Do you get affected by emotions, especially negative emotions?

03:24 Respondent 3

嗯，并没有。

Well, no.

03:26 Researcher

就完全没有吗？

Is it completely out of the question?

03:30 Respondent 3

负面情绪啊那那这样吧。我我们具体的来说，这样的话你好理解一点，嗯，那么我会给你提供几种负面情绪。然后给他对他做出一些表述，那么你就我的这个表述，你可以告诉我一下你的真实的看法。OK.嗯，第一种就是倦怠。倦怠呀。现在就是简单的说，就是啊很疲倦啊，可能是因为这个信息内容太多，也可能因为这个课堂活动啊过密啊，再有可能是因为这个同学不停的这个进行进行进行答复啊。总而言之，就是你就很疲倦，就是倦了。因为倦了，所以我就不想参与了，或者说我就是短时间的，我就不用它了。

Negative emotions, well, that's it. Let me break it down for you in a more specific way, so you can better understand. I will provide you with several negative emotions and describe it. Then, based on my description, you can share your true thoughts. Alright, the first one is burnout. Simply put, it means feeling very tired. This could be due to too much information, overly frequent classroom activities, or the student constantly responding. In short, you feel very tired and don't want to participate anymore, or you just don't need it for a short time.

04:22 Respondent 3

嗯。

Well.

04:24 Researcher

并没有并没有，OK, 好好，嗯，以下你都是哦，回答真实的情况啊，一定是真实知道吧，一定是真实，我一定突出是真实好，第二种就是说焦虑。那比如说啊，你看到啊。啊有的呃有的人就是大家有看到大家都都在都在都在学习，天天打卡啊，我没有。是吧，所以我会感到很焦虑。啊或者是说呢，就是我想呢。呃，有些有有些活动呢，我想，嗯嗯，我想这特别是比方说我们课后的布置一些任务啊。哦，我我不想马上就完成，我可能想过一会儿过一段时间我再去完成，但是呢，随着时间的流逝呢。他的任务在不断的累积，所以呢，我一看到这么多的任务，头皮发麻，我感到很焦虑。焦虑这个这个有的有的是吧。

No, no, no, OK, okay, well, the following are all true, you must be aware of the real situation, it must be true, I will definitely highlight the truth. The second type is anxiety. For example, you might see that some people are all studying, checking in every day, but I am not. So, I feel very anxious. Or, for example, there are some activities, I think, for example, after class assignments. Oh, I don't want to complete them right away; I might think about it later, but as time passes. The tasks are piling up, so when I see so many tasks, my scalp goes numb and I feel anxious. Do you?

05:25 Researcher

那说说具体的情况是什么呢。

What about the specific situation?

05:29 Respondent 3

嗯，就是。嗯，慕课可以吗？

Well, yeah. Well, MOOCs?

05:33 Researcher

可以嗯。

Well, sure.

05:36 Respondent 3

就是因为我们现在嗯需要完成那个心理健康的慕课的视频和作业。但是但是明天就截止了。然后我还有一些作业需要完成，因为拖到了现在，所以会有一些呃负面情绪。那也就是说就在慕课完成的过程当中，对吧，由于积累的这个作业量和这个任务。使我感觉到很焦虑，对吧？或者感觉到焦虑对吧？好，第三种叫嫉妒。嫉妒啊，比方说啊，比如说我们看到有些人啊，他总是。啊，回答的很好，或者是表现的很好，你感觉我别人过得比你好。或者说有些人啊，他的那个评价总是能引来很多很多同学或者是老师的这个表扬。啊，而自己的呢，却石沉大海。所以嫉妒。

That's because we need to finish the mental health MOOC video and homework right now. But it's due tomorrow. And I have some homework to do, so there will be some negative emotions because I've been dragging it out until now. That means, during the completion of MOOCs, the accumulated workload and tasks make me feel anxious, right? Or do I feel anxious? The third type is jealousy. For example, when we see someone who always answers well or performs well, you might feel that others are doing better than you. Or some people's evaluations often draw praise from many classmates or teachers, while your own remain unnoticed. So, jealousy.

07:01 Respondent 3

这个并没有。

That didn't happen.

07:02 Researcher

OK, 好，那下一个。住宿。沮丧啊，有的时候看到就是。呃，看到别人的表现。啊会莫名其妙的觉得沮丧，或者是莫名其妙的感觉到不太好。

Ok, ok, so next. Accommodation. Frustration. Sometimes it's just seeing. Uh, seeing how other people are doing. Ah, you get a sense of inexplicable frustration or an inexplicable feeling that things aren't going well.

07:20 Respondent 3

嗯，会有会有。

Well, there will be.

07:23 Researcher

嗯有什么有什么表现吗。

Well, what's the performance like?

07:27 Respondent 3

嗯，就是比如说，比如说在嗯那个慕课的学习中的作业，就是讨论作业上，可能可能因为别人答的就是很多很全，然后嗯，因为自己没有想到过那么多的答案什么的，会有点沮丧。

Well, for example, in the homework dashboard of the MOOC, which is a discussion assignment, you might be a little frustrated because someone else has answered a lot of questions and you haven't thought of that many answers.

08:06 Researcher

那也就是说，比方在慕课的讨论学习当中，对吧，由于同学的答案很全面，对吧，自己没有做到，所以感觉自己不够好是吗？是这个意思对吧。

That means, for example, in the discussion and learning of MOOCs, right, because your classmates 'answers are very comprehensive, right, you didn't do it yourself, so you feel like you're not good enough, right? That's what it means, right?

08:17 Respondent 3

对OK好。

OK.

08:18 Researcher

下面一个是压力。压力啊，假如说呃有些人在在群里面。啊，或者说。呃呃，有些人在在在在我学习过程当中啊，会会发布一些。这个信息吧，那我很容易受到这个外界影响，所以感觉到很有压力。或者是我经历过啊一两个就是特别忙的这个时期。诶。或者说就是在学习过程当中，我总有一段时间我会我会比较忙。那么这个时候呢啊，系统上面太多的信息就给了我很大的压力。

The next issue is pressure. For instance, if some people are in a group or during my study process, they might post some information, which can easily affect me and make me feel very stressed. Or, I have experienced one or two particularly busy periods. Or, during the learning process, there are always times when I am quite busy. At such times, the overwhelming amount of information on the system puts a lot of pressure on me.

09:00 Respondent 3

嗯，这个也没有没有好。

Well, that's not have either.

09:04 Researcher

下面一个就是。不满意啊不满意。嗯，不满意啊，有的时候就是这个信息太多啊，让自己觉得。就是使用起来不舒服。啊，还有的时候就是因为推荐的内容太多，弹出的内容太多，重复出现。或者说就是因为课程一些课程设计的一些不合理的因素，或者说是嗯，其他一方面的，就是让人觉让你觉得嗯没有达到你的期待。不满意。

The next one is. Unsatisfied, indeed. Sometimes it's just too much information, making the experience uncomfortable. Other times, it's due to an overload of recommended and pop-up content, which repeats frequently. Or perhaps because of some unreasonable aspects in the course design, or other factors that make you feel it hasn't met your expectations. Unsatisfied.

09:36 Respondent 3

嗯，这个也没有。

Well, that one doesn't either.

09:38 Researcher

没有好。接下来就是失望。失望啊，比方说，呃，有的人他的。啊就说自己的自己的那些活动啊，老师很少点评啊，这个同学也很少点赞，就是挺失望的，就慢慢的也就不想参与了。

Then comes disappointment. Disappointment, for example, some people say that their activities are rarely commented on by teachers and their classmates rarely like them, so they are quite disappointed and gradually do not want to participate.

10:01 Respondent 3

嗯，这个也没有没有好。

Well, that's not good either.

10:03 Researcher

下面一个叫抑郁。啊，抑郁。哎，这个抑郁也是中性的啊，知道吧，你不要想象就是说抑郁是不是抑郁症呢，不是就是我抑郁症抑郁。在很只有累积到很大很严重的时候才会导致抑郁症啊，抑郁是很正常的对吧，像emo嘛，对吧，我emo了对吧啊是不是。啊很正常对吧。嗯，比如说我看到我喜欢的明星结婚了啊，我阴O了啊，这个很正常。啊啊，抑郁。呃叭方说，呃，我会看到别人发布的各种各样的那个答案或者别，或者别人的各种各样的互动吧，或者信息。

The next one is called depression. Ah, depression. Well, this kind of depression is neutral, you know? Don't assume it's the same as clinical depression. It's just a feeling of being depressed. Depression only becomes a clinical diagnosis when it accumulates to a very serious level. Depression is quite normal, right? Like feeling down, isn't it? It's very common. For example, if I see my favorite celebrity getting married, I might feel a bit down. This is quite normal. Depression. Uh, I also see all kinds of answers or comments posted by others, or their various interactions or information.

10:47 Researcher

啊，我会有形无形的跟别人进行比较。是吧，然后觉得自己不如他人。

Oh, I compare myself to other people, either literally or figuratively. Right? And then I feel inferior to other people.

10:57 Respondent 3

这种这个没有。

This one doesn't.

10:58 Researcher

这个没有就是说你不会和你不会通过跟别人比较，然后觉得自己不如别人，然后产生抑郁对吗。

This means that you don't compare yourself to others and feel inferior to others and become depressed, right?

11:06 Respondent 3

对。

Yes.

11:06 Researcher

OK. 接下来一个是害怕。害怕。害怕就是。就担心自己的这个。担心自己的在参与过程当中的一些行为而。而产生一些这个。啊，不必要的误会。

Ok, the next one is fear.Fear. Fear is just worrying about yourself. Worrying about your own behavior in the process of participation and having some unnecessary misunderstandings.

11:38 Respondent 3

这个这个应该有。

This should be there.

11:43 Researcher

这个应该有是吧，那你有什么表现呢。

I think it should be, so what's your performance?

11:46 Respondent 3

嗯，就是比如说，嗯，老师要求发弹幕，就是选项的时候发弹幕选择正确选项的时候，有时候会就是会害怕自己的那个选项是错误的。

Well, for example, well, the teacher asks you to post a bullet screen, and when you're choosing, you post a bullet screen and choose the correct option, sometimes you're afraid that your option is wrong.

12:04 Researcher

嗯，OK, 好。害怕，下面是担忧。担忧啊，比如说我们这个同学里面啊，有的同学学习成绩可能会比你更会比你还好啊，你已经不错了，对吧，有的同学可能比你还好。那么你会就是。担心就是自己说错话。

Alright, OK. Fear is one thing, but worry is another. For instance, among our classmates, some might have better grades than you, and you're already doing pretty well, right? Some might even be better than you. You might worry about saying the wrong thing.

12:28 Respondent 3

这个没有没有。

There was no such thing.

12:31 Researcher

接下来是气愤。啊因为比方说因为某些人做的某些事情让你感觉到很气愤。或者说是其他的课程设计也好，总而言之，反正就是各方面的让你感觉到很气愤，让你放弃这个东西有没有。

The next thing is the angry. Ah, because for example, something that some people do makes you feel angry. Or it's a different course design, or whatever, it's something that makes you feel angry in all aspects, and makes you give up on it.

12:51 Respondent 3

这个没有没有。

There was no such thing.

12:52 Researcher

你就紧张紧张有过吗。

Have you ever been nervous?

12:57 Respondent 3

紧张。嗯，有过的。

Tense. Well, it's been there before.

13:02 Researcher

嗯，有什么表现呢。

Well, what's the performance?

13:05 Respondent 3

就是。在公布答案之前。

Yes. Before the answer is announced.

13:09 Researcher

嗯。

Well.

13:14 Researcher

公布答案之前，那你有什么期待吗？或者是什么原因导致你紧张的？

Before you reveal the answer, do you have any expectations? Or what causes your nervousness?

13:21 Respondent 3

嗯。就是害怕自己的答案是错误的。

Well, I'm afraid my answer is wrong.

13:34 Researcher

害怕自己作答错误是吧？

Afraid of getting it wrong, right?

13:36 Respondent 3

对。

Yes.

13:37 Researcher

就是在公布答案之前害怕自己作答错误，所以你很紧张，对，是这样的吗？嗯。好好，我们这个谈完嘞，你现在其实啊。

You're nervous because you're afraid of getting the answer wrong before it's announced, okay? Yes, right? Well, we're done with that. You're actually...

13:52 Respondent 3

啊。

Oh 。

13:53 Researcher

我我说我说我们这个谈完了，其实我可以给你一个反馈。嗯嗯，就就是说你你会对。你会对在信息化使用过程当中。那不熟悉的不熟悉的功能，你会自我进行屏蔽。对吧，对啊，你也会因为这个呃作业，呃，你也会感觉到一一定的焦虑沮丧。呃，担心还有紧张。嗯，这些都是来自于呃作业量。或者是来自于。呃。更多的是来自于老师的评价。

I said we've finished this discussion, but I can actually give you some feedback. You will become more familiar with the functions you are not used to during the use of information technology. Yes, you will also feel a certain level of anxiety and frustration due to the workload, as well as worry and tension. These feelings mainly stem from the amount of homework or, more importantly, from the teacher's evaluations.

14:35 Respondent 3

对。

Yes.

14:36 Researcher

啊？你好像不是很在意同学的评价？

Oh? You don't seem to care much about your classmates' opinions?

14:39 Respondent 3

对嗯。

Yeah.

14:40 Researcher

那就说明你那那那是你对自己很有自信。

That means you have a lot of confidence in yourself.

14:49 Respondent 3

可能一定程度上有吧。

Maybe to some extent.

14:53 Researcher

对。对。对吧，所以这样子的话，这种研究也还是有有一定的意思的，通过这样子的一个交互，能够更多的更深入的去了解。Yeah. 是不是？嗯，但其实我想说的话，我作为老师，作为你的老师，我觉得你可以。呃，我觉得就是适当的这个紧张是是有益的。啊，是有益的。也是也是必要的，嗯，但是其实并不需要。

Right, right, right. So, this kind of research still has some significance. Through such interactions, we can gain a deeper understanding. Yeah, right? But as your teacher, I think you can handle it. Uh, I believe that a moderate level of tension is beneficial and necessary, but it's not absolutely essential.

## Interview 4

00:00 Researcher

喂，许文静，能听到我声音吗？

Hello, Xu Wenjing, can you hear me?

00:04 Respondent 4

我马应该不卡啊。

My connection shouldn’t be lagging.

00:06 Researcher

能听到我的声音吧？

Can you hear my voice?

00:08 Respondent 4

啊可以听见，哎好。

Ah, yes, I can hear you. Okay.

00:11 Researcher

那个打电话的目的啊，就是我刚刚发的那段文字里面进行了表述。那么呢，有几点呢，我想在我们正式开始之前来跟你对对你进行一个这个解释，首先呢，我这是一个做一个科学研究的一个目的，所以呢，呃你的。呃，交流过程当中你的那些观点表达，嗯，一定要是真实的，就出自于你自己内心的真实的一个看法和想法啊，就不受任何外界因素所干扰的。然后第二点的话，我这里面提到的说是云课堂对吧。它是其实我想表达的是以语课堂为代表的，这样子的话，信信息技术的啊教育辅助工具。

The purpose of this call is as stated in the text I just sent. Before we officially begin, there are a few points I’d like to clarify with you. First, this is for scientific research purposes, so during our conversation, your expressed viewpoints must be genuine—your true thoughts and opinions, free from any external influences. Second, when I mentioned "cloud classroom" earlier, what I actually meant was educational auxiliary tools represented by platforms like Rain classroom, which utilize information technology.

00:59 Researcher

那么像这样的工具有很多，比如说呃你们用的那些电子词典，手机里面下的那些什么英语，呃背单词的那些APP，包括你们呃这个我们所使用的语课堂职教云等等这样子的平台，它都属于。所以你你对于这些东西，你有一个大概的印象了吧。

There are many such tools—for example, electronic dictionaries, English vocabulary apps on your phone, or platforms like Rain classroom and Cloud classroom that we use. So, do you have a general understanding of these now?

01:23 Respondent 4

啊哦对对好，嗯。

Ah, right, okay.

01:25 Researcher

然后下面一个就是名词解释，就是关于中辍现象，这个中硕现象，它是一个比较普遍的一个行为，在教育领域呢，它表现为就是学生会放弃自己的学业啊，过了一段时间之后，自己又重新回到这个轨道上面来，那么。啊，我举个例子啊呃呃，比如说呃有的人他使用这个微信。使用微信他会用一段时间，然后呢，他会放弃使用微信，然后呢。他又重新捡回来。他放弃的那段时间。和他后来捡回来这两个行为勾在一起，就拼合成了这个中枢行为。所以你对于中出你有概念了吧。中硕是，呃，就是简单的说，就是说就中断。就中断中断这个这个你有概念了啊。嗯，对啊好，那么下面我就想问你的，嗯，第一个问题就是说啊啊，你在使用我们这些信息化的这个教学。软件的过程当中啊。你有没有出现过这种中断的现象？

Next is a term explanation: "Intermittent Dropout behavior." This is a relatively common phenomenon in education, where students temporarily abandon their studies but later return to them. For instance, someone might use WeChat for a while, then stop, and later pick it up again. The period of abandonment and the subsequent return together constitute Intermittent Dropout behavior. So, do you understand the concept now? In simple terms, Intermittent Dropout means interruption—you get the idea, right? Okay. Now, my first question is: Have you ever experienced such Intermittent Dropout while using these educational software tools?

02:43 Respondent 4

有有过有过是吧，对就是呃就是我可能是我需要它的时候，我可能会去使用它，就是说我阶段性的嗯用就是用它的时候才会去想到它，就像啊你说的是我们使用那些APP软件。之前就像我们可能啊，你像我现在就很少去使用那些英语所要学习的软件，因为我现在就可能对这一方面的需求就没有那么强，就比较弱了。可能它就是一个中断性的，就我在大学里的时候就说我可能备考英语或者是嗯考试啊好吗？嗯，考试的前一阶段可能会更加强烈的去使用它们。

Yes, I have. For example, I might use them only when I need them—like during certain phases, such as exam preparation. It’s similar to how we use apps. Right now, I rarely use English learning apps because my need for them isn’t as strong. It’s a kind of Intermittent Dropout—like in college, I’d use them intensively before English exams but not otherwise.

03:31 Respondent 4

我觉得这应该也算是一种你刚刚说的那个中硕的新闻。

So, in this situation, it is a kind of Intermittent Dropout, right?

03:40 Researcher

那就是说你会阶段性的使用，然后有需求的时啊，有需求的时候你就会使用它，比如说备考的时候，你就会把它捡起来，对吧？

I think this counts as the Intermittent Dropout behavior you mentioned.

03:52 Respondent 4

对。

Yes.

03:52 Researcher

那你这种属于我们的叫做暂停性的中硕，就是说呃我会过一段时间。使用这些东西，比方说我会把一些不常用的，我会把它先退出，有需要的时候我再加入。对吗？嗯，你属于暂停性的对吧。好。那么下面还有一个就是说我们人类是其实是有情绪感知的嘛。那么我们的一些负面的一些情绪会不会影响你这个这种中断行为。

This would fall under what we call "paused Intermittent Dropout," where you set aside less frequently used tools and return to them when necessary. Correct? So, yours is paused Intermittent Dropout. Now, another point: Humans have emotional perceptions. Could negative emotions influence this Intermittent Dropout behavior?

04:31 Researcher

Uh.

04:33 Respondent 4

负面情绪对。

Negative emotions?

04:34 Researcher

就有的时候比方说我就不高兴了，缘分了。嗯。

For example, if I’m upset or frustrated...

04:39 Respondent 4

啊对我我我会就是可能啊，我觉得我在呃使用这个呃信息化的软件的时候，然后我就是因为情绪，可能就是可能呃就是情绪不不太好或者是干嘛的，我可能会就是就是就是我正在做这件事情的时候，我会我会终止这件事情。因为我现在不想做了，然后我不开心了，我就不会做它，也不会用它，我可能会做其他的事情，就觉得它不好，我们没有就是说。嗯，我用它的时候没有达到我自己的预期，然后呢，我就会觉得这个不好，我可能会换一个。这样的。

Ah, yes. For me, if I’m using an educational app and my mood is off—maybe I’m feeling down—I might stop midway because I don’t feel like continuing. If it doesn’t meet my expectations, I might switch to another app.

05:32 Researcher

好，那呃，你通过你刚才的表述啊，我觉得你这种可能是属于那种不满意这种情绪因素所导致的，就是说没有达到你自己的预期。啊所以你就可以换一个去使用，那么那么接下来呢，我将会呃嗯提炼几个啊，提炼我们常见的一些这个负面情绪啊对你呢做出一些解释，你如果认同啊这些行为。那么你就做一个结合你自身的这么一个表述啊。嗯，那么我下面需要再强调一点，就是说一定是因为就这个情绪本身它所带，它会导致你进行一个中途放弃。明白吧，就是说你这个情绪和你的这个中途放弃，两者之间是有关联的啊，一定是这个是有关联的，至于这个情绪是由什么因素导致的。

From your description, it seems your Intermittent Dropout stems from dissatisfaction—when the tool doesn’t meet your expectations, you switch. Next, I’ll outline some common negative emotions. If you relate to any, you can elaborate based on your experience. But remember, the emotion itself must directly cause the Intermittent Dropout—there must be a clear link between the emotion and the abandonment.

06:33 Researcher

啊，这个我不管，但是这个情绪一定是是在你使用这个APP的过程当中所产生的。明白吧，嗯嗯好，那么我第一个就是说倦怠。倦怠啊，比如说就是说这个内容太多了，信息太多了。嗯，让我感觉到很疲倦嘛，很疲惫，那么然后我就会嗯中断使用它。这种体会你有没有过？你会不会因为倦怠，所以说你去放弃使用？

I’m not concerned with what triggers the emotion, but it must arise while using the app. Understood? Okay. The first emotion is "burnout." For instance, if the app overloads you with too much content or information, making you feel exhausted, you might discontinue using it. Have you ever experienced this? Would burnout lead you to abandon using it?

07:14 Respondent 4

系啊，我我想一下啊嗯。

Let me think...

07:17 Researcher

你想一下没关系，就是根据自己的实际实际的嗯体验来啊，你觉得有过就有过，没有就没有就没有。

Take your time—just answer based on your actual experience.

07:28 Respondent 4

我就是有过，但是就是我是之前在备考的时候，然后我是它有很多那种套题你知道吗？就是然后它就是有那种专项性的套题，还有那种就是比较简练的题目，就是一开始在就是使用的时候，自己其实是因为自己的心情，就觉得感觉自己能把所有就是很多那种。嗯，专项性的题目都给他做完。但是到后面快要我是因为那个时间性的问题，就可能他快要到临考了或干嘛的时候，然后我就会选择性的，可能会选择另外一个，就是它比较呃比较简洁的，就是它可能就是押题一样的那种简呃简单的那种什么，就是汇总性比较强的。然后去做另外啊，放弃现在所所所学所所在见习的那些题目。我觉得这个应该也是导导致我放弃他的一个那种原因吧。

Yes, I have. During exam prep, some apps have extensive question sets—both specialized and concise ones. Initially, I’d feel motivated to tackle all the specialized questions, but as the exam approached, I’d switch to simpler, summarized materials due to time constraints. This shift made me abandon the earlier, more intensive practice. I think this counts as fatigue leading to Intermittent Dropout.

08:40 Researcher

倦怠，倦怠主要是这里侧重就是说，呃，由于，呃，信息化工具所推送的这个信息量过大，导致你的这个倦怠。就是因为它量太大了，所以让让你觉得很倦怠，然后所以你才会放弃。你会不会因为他他他推送的信息量过大，你你会觉得疲倦呢？

Here, burnout specifically refers to feeling overwhelmed by the sheer volume of information pushed by the tool. Would excessive information from the app make you feel tired and lead you to quit?

09:09 Respondent 4

我目前好像没有感觉没有没有没有这样过，因为它量大的话，我可以选择性的去去去去去去提取我自己所需要的东西，我觉得是一样的。

I don’t think I’ve ever really felt that way because when there’s a large volume of information, I can selectively extract what I need. I feel it’s the same.

09:22 Researcher

那那你就不属于那那就是没有没有这个倦怠。那么，嗯，那第二个就是焦虑焦虑叭，如说啊，你看到啊，你看到有的人啊，参加这个学习打卡这个活动，他天天打卡，感觉大家都在学习，而我却没有。所以呢，嗯，你就会产生一种焦虑感，然后让你就放弃使用它啊。

Then you don’t fall into that category—meaning you haven’t experienced burnout. Now, the second one is anxiety. For example, say you see others participating in a study check-in activity, posting daily updates, making it seem like everyone is studying except you. This might make you feel anxious and eventually lead you to stop using the platform.

09:51 Respondent 4

这个其实有过就是呃之前我们在学校的时候，天天就是背单词，每天不都是有一个打卡的那个呃那个那个记录嘛。然后我们会跟朋友还有同学就相互分享，就是说我今天已经完成了这项，然后呢，但是当我朋友分享给我的时候，我然后我今天并没有完成这个时候，其实我的心里是感觉是有焦虑的。然后我会就是立马去进行这一项工作。但其实在进行这一项工作的时候，并没有因为是你主动去去就是像每天一样主动去打卡的这些事情，呃学的那个比较扎实。

Actually, I have experienced this. Back in school, we had a daily vocabulary memorization routine with a check-in record. We’d share with friends and classmates, saying, “I’ve completed today’s task.” But when my friends shared theirs and I hadn’t finished, I did feel anxious. I’d immediately rush to do it. However, when completing the task this way, it didn’t feel as solid as when I proactively checked in daily.

10:37 Respondent 4

然后我是为了去打卡而去打卡啊，其实这个。东西我觉得是给我带来过焦虑的。

I was checking in just for the sake of it. Honestly, this did bring me anxiety.

10:48 Researcher

那也就是说，你参加了每天单词的呃，参加了每天单词背诵活动，朋友每天都按时完成任务，觉得大家都在学习，而自己却没有。是这个意思。

So, you participated in the daily vocabulary memorization activity, saw friends consistently completing tasks, and felt like everyone was studying except you. Is that what you mean?

11:01 Respondent 4

对对对对。

Yes, yes, exactly.

11:03 Researcher

好好，接下来一个叫做嫉妒。嫉妒嫉妒这个顾名思义嘛，就是你看到有的人他他在我们的这个平台上面对吧，他的这个反应特别好。啊记住，包括我们使用雨课堂之前，我们使用雨课堂或者职教云的时候，它都有一个平台互动功能嘛，你你能够实时的看到你的朋友或者是同学，他们的这个学习表现和学习活动吗。对吧，会不会因此而产生嫉妒？

Okay. Next is jealous. As the term suggests, it’s when you see someone performing exceptionally well on the platform. For instance, before using platforms like Rain Classroom or Cloud Classroom, there were interactive features where you could see peers’ learning activities in real time. Did that ever make you feel jealous?

11:40 Respondent 4

呃啊我我呃有也有过，就是之前呃上课的时候，就是老师不是让你，让我们就是说把自己的观点或者是那个评论就是发表在那个下面，然后我们就像你说的，可以实时看到，但是我觉得这。不是一种嫉妒吧，就是他可能啊看到别的同学都已经完成了，然后我就会想办法去调啊，来描述我自己的观点，然后也发上去，然后让其他同学看到。我觉得可能不是一种嫉妒，就是可能是一种两就是相互之间的呃积极的那种促进关系吧。我觉得这应该不是嫉妒，在我这边没有没有感觉是嫉妒。

Well, I have had moments like that. In class, the teacher would ask us to post our opinions or comments publicly, and as you said, we could see others’ responses in real time. But I wouldn’t call it jealous. If I saw others had already posted, I’d try to adjust my own thoughts and share them too, so others could see. It felt more like mutual encouragement—a positive push—rather than envy. At least, I never perceived it as jealous.

12:27 Researcher

这个嫉妒啊，我我再举两个例子，就比如说啊，都是我我看到别人的，我们前提还是不变，依然还是说我们这个参与实时讨论。啊，看下实考论的。看到他们的那些观点啊，被同学们点赞了。而自己呢，没有得到什么好的消息，或者说呢，感觉别人比自己这个表现的好，别人比自己过得更好。这种都属于我们的范畴。

Let me give two more examples of jealous. Suppose, during real-time discussions, you see others’ viewpoints getting praised or “liked” by classmates, while yours receive little attention. Or you feel others are outperforming you or doing better in general. These fall under our definition.

12:58 Respondent 4

啊啊啊啊啊，那那那我觉得这这这应该都有过吧，反正我我有过我啊我我只会感觉他好厉害，他会说我写的不好，然后说我写不出来。这这应该也算是嫉妒对不对？

Ah, I see. Then yes, I’ve definitely felt that way. I’d think, “They’re so good,” while criticizing my own work, saying, “I can’t write as well.” That counts as jealous, right?

13:14 Researcher

嗯对。

Yes.

13:15 Respondent 4

算是算是是是是的是有过的。

Then yes, I’ve experienced it.

13:19 Researcher

所以我们说这个是我们私人的，就是只有我们两个人才知道的。我们我们也不会公开这个你的这个信息的，包括我在研究过程当中，包包括我在研究的这个结果我也会使用。啊匿匿名的形式啊，去呈现我们这个这个这个讨论，所以那别人是没有办法知道我们之间到底讨论什么东西的啊。所以说你一定是一个真实的感受啊，一定是一个真实的感受，知道吧。

This is strictly confidential—just between us. Your information won’t be disclosed, and in my research, all discussions will be anonymized. No one will know what we’ve talked about. So, please share your genuine feelings.

13:51 Respondent 4

对对对。

Got it.

13:52 Researcher

嗯。啊。那么下面一个就是沮丧，嗯，沮丧，比方说你参加了某一个活动，参加了某一个课堂的活动，或者说使用过。呃，嗯，某一个一一，呃，使用过某个APP中的一个学习功能之后。就是莫名其妙的觉得很沮丧。或者是心里感觉不好。

Next is depression. For example, after participating in a class activity or using a learning feature in an app, you might inexplicably feel frustrated or upset.

14:25 Respondent 4

嗯，这个好像也有过，就是呃就还是你以我备考那个什么四级呀6级这样来算的话，就是我觉得啊，每天背那个单词，我可能已经背了很多遍。然后但是怎么那个手机上背的和你在书上感觉都不一样，然后就会觉得这个软件不好，然后这个软件是不是不全面啊干嘛干嘛的。这我觉得这应该也不是沮丧吧。

I think I’ve felt this too. Take preparing for exams like CET-4 or CET-6—I’d memorize words repeatedly, but the app’s version felt different from the textbook. I’d start doubting the app, thinking it’s incomplete or flawed. But I’m not sure if that’s frustration.

14:59 Researcher

就是你有没有感觉到莫名的，就莫名其妙的感觉到，就比方说啊，你比方说我们参与一个课堂活动，还是以课堂活动为例啊，课堂活动当中就是当你看完别人的这些答案和表现之后。你会不会莫名的感觉到沮丧？或者是莫名的感觉到心里不太好。

Have you ever felt inexplicably depressed after seeing others’ answers or performance in a class activity? Like a sudden drop in mood?

15:21 Respondent 4

我会会有，因为我觉得啊，不是你要是如果我就是我可能发表的观点或者是评论没有别人好啊，别人就是获得了同学的那个呃呃就是夸奖啊，如果没有，然后我们就心里肯定会感觉有一点点不舒服。

Yes, I have. If my comments or opinions weren’t as well-received as others’, or if others got praised while I didn’t, I’d definitely feel a bit upset.

15:39 Researcher

就会会有这种嗯好好的，那么接下来就是压力。压力啊，压力。嗯，比如说啊有的人会在。呃，会在使用这个我们的这个信息化工具过程当中啊，会发布一些负面的信息。而我呢，就很容易受到外界影响，这个时候呢，我感觉到很有压力，或者说呢，呃，总会有那么一两个特别特别特别忙的这个时候，这个时候啊。这个平台上面就推送了太多的这个信息啊，给我很大的压力。

Okay. Next is stress. For instance, some users might post negative content on these platforms, and if you’re easily influenced, it could stress you out. Or during busy periods, the platform might overload you with notifications, adding pressure.

16:26 Respondent 4

这个的话，我觉得就是我在做那个毕毕毕设的时候吧，我觉得有有深有感受，就是呃，那时候是因为又要工作，然后每天又要做第一次。然后呢，就是我身边的朋友他们的第一次就是已经早早的完成。然后然后我呢就是在使用这个跟他们做同一类型的课题的时候，然后使用到的展现。然后呢，我就感觉我可能是没有他们熟熟练，就是刚开始就觉得心里很有压力，而且那些软件推送的那些课程对不对，然后我要一点一点去看，但是我的心里又很非常的着急，然后我想赶紧给它看完，但是。

I relate to this during my graduation project. I was juggling work and thesis writing, while my friends had already finished theirs. Using the same tools for similar topics, I felt less skilled and under pressure. The app kept pushing courses, and I had to go through them step by step, but I was impatient and just wanted to rush through.

17:12 Respondent 4

我就会觉得呃，但是我不看它，我又不会使用它，然后我我还要必须一点一点去看它，我就觉得当时的话就是特别特别的，每天就很烦很烦。我觉得这这就是对我的一种情绪上的压力，我觉得很难受，而且有时候就会感觉到，就是当你压力很大的时候，我就不想做，但是时间又很紧，你还要必须去做啊，我觉得这这这应该算是你现在所说的那个软件什么信息化的压力吧。

It was frustrating—I had to learn the software, but the urgency made it stressful. Sometimes, the pressure was so overwhelming that I didn’t even want to work, yet the deadline forced me to. I’d say this fits what you call “digital stress.”

17:43 Researcher

嗯，那就是说你在开在课题开展的，课题开展的时候所依据的这个软件你并不是很熟悉，每天感觉到很烦。所以有压力对吗？

So, during your project, unfamiliarity with the software made you feel stressed and annoyed daily?

17:57 Respondent 4

对对对对。

Exactly.

18:04 Researcher

那么下面一项就是不满意。不满意的话，你刚刚说了，就是没有达到自我预期，可以换一个使用。对吧，不满意。这是好，然后再下面一个就是失望。失望啊失望。就是比方说啊，你我们还是以这个课堂课堂这个互动为例啊。啊，你看到别，你看到这个课堂互动，你自己的课堂互动，很少有别人点赞或者是评论挺失望的，慢慢的你也就不想啊，在课堂互动当中表达自己的观点了。

Next is dissatisfaction. You mentioned unmet expectations could lead to switching tools. Then comes disappointment—say, if your contributions in class discussions rarely get likes or comments, you might feel disheartened and eventually stop participating.

18:44 Respondent 4

我我我好像没有没有过这样，就是我还是挺爱发言的，就是别人即使不给我点赞，不给我讲的话，我我还是挺爱发言的。

I don’t think I’ve felt that way. I enjoy speaking up, even without recognition.

18:58 Researcher

好的，那下面就要做抑郁。抑郁啊，比如说还是以课堂活动啊，课堂互动活动为例啊。嗯，课堂互动活动中你会看到很多人啊，他发了各种信息，无形之中呢，会把自己啊跟他人进行一个比较。呃，在面对，呃，比自己好的人的时候呢，就会觉得自己不如他人。抑郁，我当然这个抑郁是英文翻译过来翻译成汉语的啊，它的英文其实对应的应该叫做depression，就是有点类似于说你有点，他就是一个失望啊，失望不高兴。这个这些东西的混合体啊。

Okay. Lastly, depression. In class discussions, seeing others’ posts might trigger comparisons. If you perceive others as better, you might feel inferior. Note: This “depression” (translated from “depression”) isn’t clinical—it’s more like temporary disappointment or sadness, akin to feeling “emo.”

19:43 Researcher

和我们那个抑郁症是两回事儿啊，和我们抑郁症是两回事儿，知道吧？就抑郁就很正常，就像你emo一样，就相当于我们说emo啊，就这种感觉，就瞬间我emo了对吧啊。有没有过这样子的？

It’s not the same as depressive disorder. Think of it as fleeting low moods—like suddenly feeling “emo.” Have you experienced this?

20:00 Respondent 4

啊啊啊好像也有过吧，就是突然不像不不也突然突然性的那那一阶段吧，其实是有过的哈。嗯？

Ah, yes, I think so—occasional phases like that.

20:14 Researcher

那是因为什么而突然就爆发了呢？

What triggered it?

20:19 Respondent 4

突然爆发了。我感觉应该是自身的原因吧，就是呃嗯就像啊怎么讲啊，我来想我来我来举个例子啊，让我想一想。

Suddenly erupted. I think it's probably due to personal reasons, like uh... how should I put it... let me think of an example, let me think.

20:34 Researcher

嗯，你想一想。

Hmm, take your time to think.

20:42 Respondent 4

我觉得啊，那那个是什么呀，你要直接讲，我还老师你能不能再解释一下。

I think... what was that? You need to say it directly. Teacher, could you explain it again?

20:50 Researcher

刚刚我把那个好，我再我再。嗯，重重复一遍啊。就是看到就是看到咱们的这个课堂活动当中啊。这个很多人会发布各种各样的信息。这样。啊表达他的观点，无形之中呢，会把自己和他人进行一个比较。在面对比自己好的人的时候，就会觉得自己不如他人。

Just now, I... alright, I’ll repeat it. It’s about seeing... seeing in our classroom activities... many people post all kinds of information. Like this... expressing their views, and unconsciously comparing themselves to others. When facing someone better, they feel inferior.

21:21 Respondent 4

啊啊这个的话我觉得其实是有的，因为我我现在是我现在举例可能就是我近期在工作中的吧，然后。呃，就是我们公司也有很多活动，然后呢。

Ah... this, I think it does happen. For example, recently at work... our company has many activities, and then...

21:36 Researcher

他就是把我们这个稍等一下，稍等一下啊稍等一下哦。

.. wait a second, hold on...

21:41 Respondent 4

你是学学学学校。

You’re from... school.

21:44 Researcher

对对，一定一定是一定是你使用这个信息化信息化工具进行学习的时候。

Yes, yes, definitely... it must be when you use digital tools for learning.

21:51 Respondent 4

嗯嗯嗯啊那那我也想到了，就是之前我们在上那个信息课的时候，就是老师让我们去网上收集到一一些这个软件的，它的那个所使用的功能。但其实就是我在别的同学都已经发表了功能的时候，然后我再去收集信息的时候，我发现可能我收集到的信息就是会和别的同学相同。然后然后我就会感觉到，内心就不想再把自己的所收集到的信息再发布到那个评论区，因为我觉得在我的心里中想，会不会别的同学看到了会以为我在复制粘贴他的。并没有自己去收集，然后我觉得这个应该也算是一点吧，然后就不想再把自己的收集到。

Mmm... ah, then I remember—previously in our language class, the teacher asked us to search online for the functions of certain software. But when other classmates had already posted their findings, and I went to collect information, I realized what I found might overlap with theirs. Then... then I felt reluctant to post my findings in the comments section because I worried others might think I copied and pasted theirs instead of doing my own research. I think this counts as an example, so I didn’t want to share what I found.

22:38 Respondent 4

但其实我在没有看到他发表评论的时候，我也去网上收集了信息，然后我觉得这个应该就也算是一点吧。

But actually, before seeing their comments, I had already searched online. I think this should also count as a point.

22:51 Researcher

那你会有什么感受呢？

How did that make you feel?

22:54 Respondent 4

感受就是啊，为为什么他们就可以，因为有很多同学为什么他们都可以收集到不同的，而我收集到就必须要跟就是跟他们的都是相同的。我觉得这可能就是。收集的方式还有提取的关键词不一样吧？

I felt... why can they... because many classmates found different things, but mine had to overlap with theirs. I think it’s probably due to different search methods or keywords.

23:19 Researcher

那你的具体的感受是什么呢？你刚才只是说的是你的行为啊，就是说或者是你的分析啊，不是你的感受。

But what was your specific feeling? You just described your behavior or analysis, not your emotions.

23:30 Respondent 4

我就感觉心里挺那个，就感觉自己心里还是有一点点不舒服，或者是不想把自己的什么评论再粘贴上去的那种感觉吧，就是可能那种感觉怎么描述呢，就是。啊，心里就会反觉，感觉不舒服，然后就会感觉自己好像不如别人一样，就是这样的。

I just felt... kind of uncomfortable inside, or unwilling to post my comments anymore. It’s hard to describe, but... ah, I felt uneasy, like I wasn’t as good as others. That’s it.

24:01 Researcher

那也就是说，就是在完成老师布置的互动任务的时候，发现自己类似的这个观点已经被他人提前公布了啊对，然后呢。嗯，开展比较。啊，不要看人比较，同他人比较吧。

So, while completing the interactive task assigned by the teacher, you found that similar viewpoints had already been posted by others. Then... you started comparing yourself to them.

24:20 Respondent 4

对对。

Yes, yes.

24:23 Researcher

啊。

Ah.

24:27 Researcher

就是突然同他人比较，突然就是突然内心感受不舒服，不如别人。

Suddenly comparing yourself to others, suddenly feeling uncomfortable inside, inferior.

24:36 Respondent 4

对对对对对。

Yes yes yes yes yes.

24:38 Researcher

OK, 好。嗯，接下来啊接下来就是害怕。害怕啊害怕比如说啊嗯，曾经发过一条就还是依然前提不变啊，依然是在我们这个使用信息化技术的过程当中啊，袁老师曾经发过一条观点啊，结果导致不必要的误会啊，让我觉得很害怕。啊，或者说曾经查看过一一个后台记录啊，发现他会。这个软件会读取自己很多的私人信息，想想挺可怕的。害怕。

OK, good. Next... fear. Fear... for example, still under the same premise—using digital tools—Teacher Yuan once posted a viewpoint that led to unnecessary misunderstandings, which made me feel scared. Or, say, checking backend records and discovering the software collects a lot of private information—that’s terrifying. Fear.

25:24 Respondent 4

啊，这个。好像我好像没有没有过没有我还是挺大的好。

Ah, this... I don’t think I’ve experienced this. No, I’m pretty... fine.

25:33 Researcher

没有那就看下面一个。就担忧担忧啊，比如说我们那个群里面对吧，有学习比我好的同学，或者是我尊敬的这个前辈。啊通常不在群里面啊，不在群里面或者是不在活动当中表达自己的观点，那么自己担心说错话。

No? Then let’s move to the next one: worry. For example, in our group, there are classmates who perform better academically or respected seniors who usually don’t express their views in the group or activities. So, you worry about saying something wrong.

25:57 Researcher

就是比方说，你知道有你，你当然学习还不错。但是你知道你班上肯定还有一些同学，他学习比你好的，但是他们就是面对老师要求的呃观点表达类的活动，他们不表示不参加，不表述。但是你知道他们的存在，所以你担心自己。这个会说错话。

For instance, you know you’re doing well, but you’re aware there are even better students in class. Yet, when the teacher asks for opinion-sharing activities, they don’t participate or speak up. But you know they exist, so you worry about misspeaking.

26:25 Respondent 4

这个好像就是也没有，我觉得这个就是大家都是在发表自己的意见，就是你既然发表意见的话，就会有对有错，我就没有考虑到别人的呃就是我发表了之后会是错的，那错的就是错的嘛，然后呢。也没有说比我成绩好的，就是说的一定是对的，我觉得好像没有过。

This... I don’t think so. I feel everyone is just sharing their opinions—some right, some wrong. I never considered whether mine would be wrong. If it’s wrong, then it’s wrong. And just because someone performs better doesn’t mean they’re always right. I don’t think I’ve felt this way.

26:50 Researcher

嗯好，接下来就是气愤。气愤啊，有有些人啊，比方说有些人喜欢发一些信息，让人感觉到很气愤。

Hmm, alright. Next: anger. Some people... for example, some like to post information that makes others angry.

27:04 Researcher

这信息呢，这就是你就是你气愤的这个原因啊。啊，有很多可能是你你看到他，你觉得他这个哎，他这个他比我还差，他还有什么好意思还说话，这有可能是一种原因。第二种就是说我看到他，我看到他发的信息，觉得他这个他这个说的不对。他会误导别人的，我也会生气。总而言之，就是因为你看到了别人发的信息，所以你生气。

This information... the reason for your anger... maybe you see them and think, "They’re worse than me, how dare they speak?" That could be one reason. Another is seeing their post and thinking it’s wrong—misleading others—which also makes you angry. In short, you get angry because of others’ posts.

27:32 Respondent 4

啊，就是也是在学习中使用这个软件的过程。

Ah, so it’s also about using this software in learning.

27:38 Researcher

对对对，一定是这个这个的，是跟你工作没有关系的啊。

Yes, yes, definitely this context, not work-related.

27:41 Respondent 4

你工作当中的事情好好嗯嗯嗯，气愤气愤就是生气。

Work matters... hmm, anger... anger is just being mad.

27:49 Researcher

就咱们说生气不高兴生气吧，不能说不能说不高兴，不高兴的话是太昏太昏太昏乎了，我们就说生气，嗯，就说生气，嗯。生气会会会气愤吗？会生气吗？

We’re talking about anger, not just unhappiness—that’s too vague. Let’s say anger. Does anger... does it lead to frustration?

28:07 Respondent 4

我对别人发表意见，然后生气的话，我好像在。学校也没有我因为。好的，我觉得他们既然能发表出来，都是有原因的。然后应该都是有自己的想法啊，并没有说别人如果没有涉及到自就是自己就是说自己的利益的话，我觉得应该是没有。就是大家就是自由发挥的时候没有过。

I am getting angry at others’ opinions... I don’t think so in school. I feel if they post something, there’s a reason. They must have their own thoughts. Unless it directly affects my interests, I don’t think... during free discussions, no.

28:36 Researcher

嗯，好，那就是没有，那下面一个就是紧张。紧张啊，呃。比方说老师发布了我们的课堂互动。啊，你发完一个自己的观点之后呢。期待他人的点赞或评论，因为我们是有这个功能的嘛，你们是可以互评的嘛，对吧，期待他人的点赞或者是评论，有时让自己感到呃紧张。精神紧绷。

Hmm, good. So no. Next: nervousness. For example, the teacher posts a classroom interaction. After sharing your viewpoint, you anticipate likes or comments (since that’s a feature—you can interact). Sometimes this makes you feel... tense.

29:07 Respondent 4

这个有过。

This has happened.

29:09 Researcher

嗯。

Hmm.

29:09 Respondent 4

这个就是，呃有过你之前在。课堂中，我们不是会随机就是抽取某几位同学的答案，作业答案，然后我公布嘛，然后呃来分析。然后我就是有时候会其实是有一点点就是害怕到或者是抽到我的，然后我回答不好，就在你抽取的那个过程中，我觉得是内心非常紧张的。

This was... in class, when the teacher randomly selects a few students’ answers or homework to analyze. Sometimes I’m a bit afraid of being picked and not answering well. During the selection process, I feel very nervous.

29:45 Researcher

哦。

Oh.

30:18 Researcher

那也就是说，面对随机抽取的学生作业的未知结果的时候，担心自己被抽中？

So, facing the uncertainty of randomly selected student work, you worry about being chosen?

30:27 Respondent 4

对，因为担心的原因，肯定是怕，就是觉得自己的回答不是很好。然后，或者是不是同学们，或者是老师想要的那个结果，就是在肯紧张的前提，肯定是觉得自己没有得到肯定，会会就是是害怕自己没有得到肯定而紧张。

Yes, because the worry stems from fearing my answer isn’t good enough. Or that it’s not what the teacher or classmates expect. The nervousness comes from fearing lack of validation.

30:56 Researcher

我帮完善一下啊。

Let me refine that.

31:04 Researcher

那就是说，面对随机抽取的学生作业的未知结果的时候，害怕自己得不到，害怕自己得不到肯定，所以感到紧张是吗？

So, facing the uncertainty of randomly selected student work, you fear not receiving validation, hence the nervousness?

31:16 Respondent 4

对对对。

Yes yes yes.

31:20 Researcher

That is all. Thanks.

31:25 Respondent 4

My pleasure.

## Interview 5

00:00 Researcher

喂拽哎能听到吧，嗯。

Hey, can you hear me? Yeah.

00:02 Respondent 5

在在能听到吗？

I’m here, can you hear me?

00:04 Researcher

啊。

Ah.

00:04 Respondent 5

我这边可以听到我这个。

I can hear you on my end.

00:08 Researcher

嗯，我做几个说明啊，首先第一个我这个就是为了嗯做一个科学研究，然后采取访谈这种形式来对于我所呃关心和感兴趣的这个主题。嗯，做一些了解。那么所以说我就想嗯，你反正你你首先你也毕业了嘛，对吧？然后其次的话就是说，因为呃这个访谈的话，需要你们就是这个绝对是真实的一个想法，所以说你你这里也就是要回对我的对我的回馈反馈对对对，如实的真实的回答啊，真实的回答，然后这是第一个，然后第二点的话就是。啊，我这里面。所说的这个它是以语课堂为代表的这样的一系列的，我们的这个就是信息化的，信息化的这样的教学的这个工具。

Mm, let me make a few points. First, this is for scientific research, and I’m conducting interviews to explore topics I’m interested in. So, since you’ve already graduated, right? Also, this interview requires absolutely honest feedback from you. So, your responses should be truthful and accurate—genuine answers. That’s the first point. Second, the tools I’m referring to here are represented by platforms like Rain Classroom and similar digital teaching tools.

01:05 Researcher

包括什么APP呀，或者是其他的一些呃软件呢也好呀，或者说我们的教学平台啊，甚至是慕课呀，反正都是属于的，但是以以雨课堂为代表吧，就这样子的。雨课堂或者是职教云，或者是你们以前用的超星，或者是怎么样的啊，以它为代表这样子。然后的话，呃我这里提，我还要做一个名词解释，就是对于这个中辍现象，我们在学习，我们在嗯教育这个阶段，教育这个领域里面啊，我当我们讨论这个名词的时候，我们更多的喜欢把它界定为就是一个学生，他会放弃自己的学业。然后呢，过段时间之后呢，他会重新回到这个学业的正轨上来，这种行为就叫中硕。明白啊中出，然后现在我现在第一个想，第一个想了了解的就是说你你有你在使用这个。我们的这个信息化的教学工具过程当中，你有没有出现过这种中错的这种现象？有你有了是吧？好，那么有四中处的话，对它的分类有很多种。我们这里采用的话，采用的这个分类的话，这有三种。打断一下。哎。

This includes apps, other software, teaching platforms, or even MOOCs—basically anything in this category, but Rain Classroom is the main example. So, Rain Classroom, Cloud Classroom, or maybe ChaoXing you’ve used before—these are the representatives. Now, I need to define a term: "Intermittent Dropout." In the field of education, when we discuss this term, we usually define it as a student abandoning their studies temporarily and then later returning to their academic track. This behavior is called "Intermittent Dropout." Got it? Intermittent Dropout. Now, my first question is: Have you ever experienced this kind of disengagement while using these digital teaching tools? You have, right? Okay. There are many classifications for Intermittent Dropout, but here we’ll focus on three types. Hold on—

02:23 Respondent 5

就是比如说，就是我们之前用语课堂进老师在疫情期间进行这个网络教学，然后可能说早上就是很早嘛，然后中途是可能上课上睡着了，这个属于中错吗？

For example, during the pandemic, we used Rain Classroom for online classes. Sometimes, if the class was early in the morning, I might’ve dozed off during the session. Does that count as Intermittent Dropout?

02:37 Researcher

嗯，要看什么原因是你，你主动的，主动的说是主动的是睡着，还是说因为其他的原因导致你睡着。要看这个睡着的原因是什么，是不是你自己主动的。因为中硕肯定是你自己做出来一个选择嘛。

Hmm, it depends on the reason—was it your active choice to fall asleep, or was it due to other factors? The key is whether it was your own decision, because Intermittent Dropout implies a deliberate choice.

02:53 Respondent 5

啊是的，那那我有啊。

Ah, yes, then I have.

02:56 Researcher

那么我们有三种情况，第一种叫做间断性的，就是说我有比较长的一段时间，就是不用这个东西。然后第二种的话就是节制性的啊，可能有些功能我我我用我对于有些功能我就是不开放，或者说是我就是屏蔽。第三种的话就是暂停的，我可用一会儿停一会儿，用一会儿停一会儿，你是属于哪一种？

So, there are three types. First is intermittent—where you stop using the tool for a relatively long period. Second is selective—where you might disable or avoid certain features. Third is pausing—where you use it intermittently, on and off. Which one applies to you?

03:22 Respondent 5

等一下，第一第一种是什么？

Wait, what was the first one again?

03:23 Researcher

第一种的话就是比较长的一段时间，我就不不使用，就是要就是啊就是间断性的这么一个中中戳的行为，比如说啊，我有一段时间啊没有呃使用这样子的信息化的工具。

The first one is when you don’t use the tool at all for a long time—like a break in usage. For example, not using the digital tools for a while.

03:40 Respondent 5

嗯嗯嗯。

Mhm, mhm.

03:42 Researcher

第二种方。啊，第二种的话就是第二第二种的话就是说我我使用，但是里面有些功能我我不用它。啊就是节制性的，第三种是暂停性的。啊，我会先先退出来，然后有需要的时候我再加进去，你是属于哪一种。

The second type is selective—you use it but avoid certain functions. The third is pausing—you exit and rejoin as needed. Which one fits you?

04:05 Respondent 5

我应该是属于第二种吧，就是有一些功能，就比如说老师会回答问题，然后会发弹幕那些。如果我不想，就是不太想，就是有节制嘛。对吧，所以我我不想用那个弹幕的功能，不想不太想把，就是对自己答案不太确定，所以我就不太敢发，所以我就不会使用那个弹幕的功能，就是应该属于那种有有节制的。对吧，这这种情况应该属于有节制。

I think the second one. Like, some features, such as answering questions or sending live comments—if I don’t feel like it, or if I’m unsure about my answer, I’d avoid using the comment feature. That’s selective, right? So, I wouldn’t use the live comments—that’s selective disengagement, isn’t it?

04:45 Respondent 5

就是我就是比如说老师抛出一个问题，可能我知道答案，但是呃就是说老师说找谁回答一下，或者是怎么样，就是我就不太敢发的话，就是对自己答案很不确定，然后我就会不使用弹幕这个功能了。是我主观上的，那不就是属于有节制吗？

For example, if the teacher asks a question and I know the answer, but if they randomly call on someone, I might not dare to answer because I’m unsure. So, I’d avoid the comment feature—that’s my own choice. Doesn’t that count as selective?

05:05 Researcher

嗯，那你你是不属于不使用弹幕这个功能，还是说其他功能我使用就是就是弹幕我不用弹幕功能，对啊，就弹幕功能我会屏蔽掉对吧。嗯。

So, you’re avoiding just the comment feature, but using others? Like, you’d disable the comments, right?

05:16 Respondent 5

对这个应该属于第二种吧。

Yeah, that should be the second type.

05:19 Researcher

对。

Right.

05:28 Researcher

那就会屏蔽这个功能。

So, you’d disable that feature.

05:30 Respondent 5

对对对。

Yeah, exactly.

05:32 Researcher

那么好。

Okay.

05:33 Respondent 5

但是好像也不对，比如说老师点到你非要让你回答了。

But wait—what if the teacher asks you to answer?

05:36 Researcher

那那你也好像不能不使用啊那种是那种不是我们讨论的范畴，那种是另外一个范畴，那是另外一个领域了，对吧？啊可以，那是另外一个领域，我们更多的就是从站到你的角度去看，就是让去去考察你对于这个问题。的啊，嗯。啊，采取的这个采取的这些策略是什么？那么你刚刚提到了，就是说因为你对于自己这个呃活动就是教学活动答案的不确定性嘛，对吧？所以说你会你会你会采取这种节制性的中辍行为，那么那你也就认可了，就是我们在学习过程当中所产生的一些负面的情绪会影响。

That’s a different scenario—not what we’re discussing here. That’s another category. We’re focusing on your perspective—how you approach this issue. So, you mentioned that because of uncertainty about your answers, you’d engage in selective dropout. So, you agree that negative emotions during learning can lead to this kind of dropout with digital teaching tools.

06:21 Researcher

会导致我们这种对于信息化教学手段的这种中挫行为的出现。

This can result in disengagement behaviors toward these tools.

06:27 Respondent 5

是的。

Yes

06:28 Researcher

好，那么好，那么那你就那我下面准备了几种我们常见的这种负面情绪，那么我将对这些负面情绪啊依次做一个表述和举例。然后，呃，你呢就看一看啊，你呢就思考一下，看是再思考和回忆一下你自己的这个学习经历当中是否有啊，类似的这种感受啊。如果有的话，你就可以跟我们分享啊，你的这个表现是什么啊？如果没有的话，你就可以直截了当的告诉我你的结论啊。OK, 我们看第一种啊，第一种就是倦怠。第一种是倦怠啊，比如说啊发了很多信息，很多啊发了很多信息，我们那个内容里面嘛，网络网络网络内容里面，网络平台发了很多信息，你发现这些，你你觉得这些信息跟我没什么关系。

Alright, then. I’ve prepared several common negative emotions we often encounter. I will describe and provide examples of these negative emotions one by one. Then, uh, you can take a look and reflect on whether you’ve experienced similar feelings in your own learning journey. If you have, you can share with us how you manifested them. If not, you can simply tell me your conclusion directly. OK, let’s look at the first one—burnout. The first one is burnout. For example, when a lot of information is shared—like in our online content, on platforms—you find that this information seems irrelevant to you.

07:22 Researcher

但是又不得不看，所以让我感觉到一种倦怠，所以这种倦怠就让我不愿意使用这个信息平台。

But you still have to read it, which makes you feel a sense of burnout. This burnout then makes you reluctant to use the information platform.

07:33 Respondent 5

会有倦怠，但不至于不使用，就是信息太多，觉得看得比较繁琐，但是就是说我完全就不使用它了，就是因为这一点，所以就完全不使用它了。

I do experience burnout, but not to the point of completely abandoning the platform. It’s just that there’s too much information, making it tedious to read. However, I wouldn’t stop using it entirely because of that.

08:00 Researcher

呃，那你会不会就是产生我们不是说你完全放弃，而是说中错，比方说OK，我我今天觉得哇，这堂课老师发这么多东西啊，我就不看了，但是下一节课我觉得诶这个老师信息比较少，哎我觉得我又感兴趣了。

So, would you say—we’re not talking about completely giving up—but rather, for instance, OK, today I feel like, “Wow, the teacher shared so much stuff, I won’t read it.” But in the next class, if the teacher shares less and it’s more interesting, you’d engage again?

08:15 Respondent 5

我站在我的角度来说一下，呃，这个取决于这堂课，就是就比如说有的课可能就是。就是是嗯怎么说，有的课可能对自己来说就是感觉更偏向于这门课，就感觉这门课重要一点。那我尽管他来很多信息，那我还是会就是往里面学。但是有的课我可能觉得这个这门课，哎对我来说可能不是那么偏向或者不那么重要，那我可能会就算他信息来的很少，我也会放一放。

From my perspective, it depends on the course. For example, some courses might feel more aligned with my interests or seem more important. Even if there’s a lot of information, I’d still put effort into learning. But for courses I find less relevant or unimportant, even if the information is minimal, I might set it aside.

08:47 Researcher

嗯，那你就是会一，那你就会一啊那你就会啊以这个。

Hmm, so you’d—then you’d—so you’d base it on—

08:53 Respondent 5

啊，有选择性的，我感觉是有选择性的，就是如果这门课对我来说就是呃蛮重要的，比如说很偏向或者自己对这门就是情绪吧，还是主是倦怠啊，但是我还是会继续往下看。那我可能有那门课我觉得不太重要，或者是呃不太重要的话，我就尽管他信息很少，那我可能也不会太太那个我明白了太晚嗯。

Ah, selectively. I think it’s selective. If a course feels important to me—say, it’s more aligned or I have a strong interest—even if I feel burnout, I’d keep going. But for courses I find less important, even if the information is sparse, I might not prioritize it. I get it now.

09:26 Researcher

那就是说，你会依据这个课程在这个整个专业这个结构当中的权重来取舍，你是否去坚持下去，对吗？那好，那就是第一个是倦怠，第二个就是焦虑。比方说，你看到啊，有的有老师，比方说抛出了一个咱们课堂互动啊，你看到有的人他他天天打卡，然后大家都在大家都在学习，而我却没有。然后我会觉得很焦虑，然后我我焦虑我就会放弃，我就我就会中辍。你会焦虑不会我的话。

So, you’d decide whether to persist based on the course’s weight in the overall program structure, right? Good. So, the first is burnout. The second is anxiety. For example, you see some teachers initiate classroom interactions, and you notice some students check in daily. Everyone’s learning, but you’re not. You feel anxious, and this anxiety makes you want to give up—you’d disengage. Would you feel anxious?

10:01 Respondent 5

焦虑不会中途哦。

Anxiety wouldn’t make me drop out midway.

10:03 Researcher

那你的焦虑会怎么？

How would your anxiety manifest?

10:06 Respondent 5

我感到那么我可能有点落后了，或者是大家的进度在我上面，我可能会在这门课上，在这段时间内，我的心思就会花的更多一点。

If I feel like I’m falling behind or others are ahead, I’d probably invest more time and effort into that course during that period.

10:16 Researcher

那就是焦虑反而会促进你的学习，对吧。

So, anxiety actually motivates you to study more, right?

10:20 Respondent 5

这个。

This—

10:26 Researcher

Uh.

10:30 Researcher

焦虑反而会促进自我约束，对吧？其实就是这个意思。然后，第三个叫做嫉妒。呃，比方说，呃你当然学习成绩是比较好的啊。

Anxiety actually promotes self-discipline, right? That’s the idea. Next, the third is envy. For example, let’s say your academic performance is generally good.

10:41 Respondent 5

平常心理是吧，啊这个会会的，这个会我就是胜负欲嘛，跟同学之间的一种竞争，胜负欲是这个意思吗？就是比如说跟我呃同寝室的，他可能这门课成绩比我好，我会有嫉妒他，然后从而更努力的去学这门课，是这种吗？

Like a competitive mindset, right? Yeah, I’d feel that—it’s about rivalry with classmates. For instance, if my roommate outperforms me in a course, I might feel envious and work harder to catch up. Is that what you mean?

11:01 Researcher

嗯，胜负欲对，我们想说的就是这个这个这个所谓的胜负欲，它会不会影响你，呃放弃使用。或者是产生放弃使用信息化技术这个这个念想。

Yes, that competitive drive. Would it make you consider abandoning the use of information technology?

11:19 Respondent 5

不会去。

No.

11:21 Researcher

也就那也就是说你比如说你看到有有些人在老师抛出活动之后，他在他在不停的学，但但是你不会说，因为记住他，然后就是说我自己不参与这个这个课堂讨论了，不会的。对吧。

So, even if you see others actively participating in discussions after the teacher posts activities, you wouldn’t avoid joining just because you envy them, right?

11:37 Respondent 5

对好。

Right.

11:38 Researcher

那么下面一个是沮丧，沮丧会吗。

Next is frustration. Would you experience that?

11:43 Respondent 5

就是就是老师抛出的问题。

Like when the teacher poses a question—

11:46 Researcher

然后比方说回答不出来，对沮沮丧的，不是沮丧的话，原因有很多，有可能是来自于问题本身。比如说这个问题可能我觉得就比较难对吧，也有可能是来自于说同呃同辈之间的一个比较啊啊A同学回答的，我觉得觉得比你内心这种答案要更加完美。啊，原因很多，但是总而言之就是你会莫名其妙的感觉到心感觉不好。

And you can’t answer it, leading to frustration. The reasons for frustration vary—maybe the question itself feels too difficult, or maybe a peer’s answer seems more polished than yours. But ultimately, you just feel inexplicably upset.

12:15 Respondent 5

就是力不从心是吧？

Like feeling powerless, right?

12:17 Researcher

啊力不从心，反正就是沮丧，就是对，就就是就是说你会突然感觉到，就是因为我心里面感觉不好，所以我很沮丧。因此我就嗯，我就把这个，我就把这个沮丧的这个压力给到了这个这个呃，信息技术的使用过程当中，所以我就放弃使用信息技术，我觉得啊，这样的话会让我感觉更好一点。

Yeah, powerless—just frustration. The point is, you’d feel so bad that you’d project this frustration onto the use of information technology, leading you to abandon it because you think that’d make you feel better.

12:38 Respondent 5

沮丧会不会呃这个这个对于我来的说的话，可能如果说比如说一开始我产生这个沮丧的心理，我会说我再去试试。如果这个沮丧是一个很长时间的积累，那可能我慢慢的就会不使用。如果只是说就是一开始我还是会继续，比如说我有沮丧心理嘛，然后一开始我还是会继续尝试，直到这个沮丧的这个值啊，就是突破了我的防线了，那我可能就会去放弃了。老师明白我的意思吗？

Would frustration—for me, if I initially feel frustrated, I might try again. But if it builds up over time, I might gradually stop using it. At first, I’d persist despite the frustration, but if it crosses a threshold, I’d give up. Does that make sense?

13:08 Researcher

明白你这是个很正常的一个心理反应。

Yes, that’s a very normal psychological response.

13:11 Respondent 5

对对对。

Right, right.

13:16 Respondent 5

就是突破我的防线的话，一开始可能会忍，然后就是慢慢的自我调节。如果就是付出了很大的努力，然后呃，然后这个沮丧心理还是就是突破我了。我的就是自我的一个标准，就是受不了的话，还是会放弃的好。

If it breaches my tolerance, I might endure it at first and try to self-regulate. But if I’ve put in a lot of effort and the frustration still overwhelms me, I’d eventually give up.

13:36 Researcher

嗯，对，就是就是你，嗯好的啊，我我回头会好的好的，然后下面的话就是压力。啊，压力这个比较好理解是吧？

Yeah, exactly. OK, good. Next is stress. That’s easier to understand, right?

13:51 Respondent 5

嗯嗯，压力我觉得也要看吧，如果说就是跟沮丧，我觉得是一个心理状态，就是就是不压力，就是它会促使呃，如果对于我个人来说，它是会促使我向上的，但是如果一直长时间就是不间断的那种压力，那我可能也会说产生这种中戳的想法和行为。

Mhm. For me, stress can be motivating—it pushes me to improve. But if it’s prolonged and unrelenting, I might start considering disengagement.

14:13 Researcher

嗯，那你能够具体说一下看吗？比如说啊，你说长时间的压力，那么呃，你对于长时间的压力，你的定义是什么样子的呢？就在你使用信息化手段来进行学习的过程当中，课堂学习啊。

Could you elaborate? For example, what defines “prolonged stress” in your experience with using information technology for learning?

14:30 Respondent 5

比如，我一开始经常学习这门课程，通过这个信息化手段学习这门课程，我发现自己可能有点跟不上。然后呢，我就会对这门课就是更侧重，可能说我就是更多的精力和时间去呃努力的去学这门课。但是可能说学了还是发现自己不行，然后越学越不行，然后就是。就是学了错，就是呃然后学了错，然后发现就是我努力了，然后不太行，然后别人就是又高出我很多。然后这个比如说长达了一个时间周期，比如说呃一个月或者是说两个多星期，那我可能就会有说，就是说我可能就是对这门课，可能说自己这个自信心有点受挫了，因为一开始压力我，我去努力嘛。

For instance, if I start using this platform for a course and realize I’m falling behind, I’d focus more on it—devote more time and energy. But if, despite my efforts, I still struggle and others pull further ahead, and this persists—say, for a month or even just two weeks—my confidence would take a hit. The pressure would make me doubt myself. After about two weeks to a month, I might reach a breaking point and disengage.

15:24 Respondent 5

然后后来还是发现就是呃跟别人差距很大，或者是自己对这门课上没有尽管付出了很大的努力，但是，还没有得到一点点的改善的话，就是自信心会受挫。然后，这个压力肯定就是对自我产生怀疑嘛。然后可能说，呃两周或者是一个月，然后自己可能就是两周，呃到一个月可能就自己有点。接受不了吧，然后可能会出现那种情况。

Later on, I still found that there was a huge gap compared to others, or despite putting in great effort in this course, there was not even a slight improvement, which would really damage my confidence. Then, this pressure would inevitably lead to self-doubt. Perhaps after two weeks or a month, I might just... after two weeks, or maybe a month, I might find it a bit... hard to accept, and then that kind of situation could arise.

15:55 Respondent 5

但是前两周的话肯我肯定是全全身心的去学习这门课程，并不是说呃没有。努力的付出的那种。

But in those first two weeks, I’d be fully committed—it’s not like I didn’t try.

16:08 Researcher

大约两周，那就是说呃，就是跟不上，长时间跟不上这个课程的进度的这个压力会让你产生自我怀疑啊，大约两周后，你观察到同学反超自己，你就会中复。

Around two weeks—so the prolonged pressure of falling behind and seeing peers surpass you leads to self-doubt. After about two weeks, you’d disengage.

16:23 Respondent 5

是的。

Yes

16:23 Researcher

那好，下面一个是不满意。嗯，不满意不满意，比如说啊，这个信息太多，让我觉得用的不舒服，这也是不满意。还有的话就是说这个它会自动联想，或者是自动推送，也会不满意啊再有可能会说我我使用这个界面我不满意，再有可能就是说，嗯，就是说整个这个呃整个这个东西，它设计或者是如何怎么样，反正就是不满意啊。就是因为我不满意，所以我会会不会，你会不会产生不满意这种负面的心理感受。然后这种心理感受会让你去啊中辍。

Alright, the next one is dissatisfaction. Hmm, dissatisfaction, dissatisfaction. For example, if there's too much information, making me feel uncomfortable using it, that would count as dissatisfaction. Another scenario is when it automatically suggests or pushes content, which can also lead to dissatisfaction. Additionally, I might be dissatisfied with the interface design or the overall functionality—basically, anything that makes me unhappy. Because I'm dissatisfied, I might develop negative feelings, and these feelings could lead to discontinuation.

17:05 Respondent 5

嗯，这种这种要看，比如说这个平台，因为现在不是有很多平台嘛，就是比如说我使用这个平台，它真的已经严重的影响到了我的效率的话。

Hmm, it depends. For instance, there are many platforms nowadays. If using a particular platform severely impacts my efficiency...

17:21 Researcher

嗯。

Mhm.

17:21 Respondent 5

我呃我会的，然后我会去，可能会试试同类它的竞品，别的品牌这种算吗算。啊，那我就是会这样，如果它严重的影响到了我的效率，呃，我是会的。

I... I would, and I might try competing products or other brands. Does that count? Yeah, that's what I'd do if it seriously affects my efficiency.

17:40 Researcher

也就是说，某些平台或者说这样子的产品吧，影响到你自我感觉到，影响到自己的学习效率和效果的话，你就会重出对吧？

So, if certain platforms or products make you feel like they're hindering your learning efficiency or outcomes, you'd discontinue using them, right?

17:50 Respondent 5

嗯啊是的好。

Yeah, that's correct.

17:52 Researcher

下面就是说，下面一点就是失望。比如说你看到啊，老师，比方说是我发出了一个这个活动啊，他的活动，你看到有很多人对于对于对于某一个同学的一个答案，对于A的这个答案，大家点评非常多，然后呢，发现自己的答案。呃，下面的这个评价寥寥无几啊，这样子的这样子会我会感觉到很失望，然后慢慢的你也就不愿意再使用这个软件了。

Next is disappointment. For example, say a teacher posts an activity, and you notice many people commenting on or praising one student's answer (let's say Student A's), while your own answer receives very little feedback. This could make you feel disappointed, and over time, you might lose interest in using the software.

18:21 Respondent 5

呃什么什么评价什么评价啊。

Huh? What feedback?

18:23 Researcher

我就比如说啊，比如说比如说我比如说我们在课堂教学过程当中，老师发布了某一个教学任务，然后这是个互动性质的啊。A同学呢，他他发表了自己的看法，同时呢啊老师点击了这个呃呃老师启用了这个互评的这个功能，那么很多同学呢，呃，在他后面进行跟帖或者是和点赞，而反观反观于自己呢，却没有那么多。啊，慢慢的呢，你就就感觉到很失望，所以你也就不愿意再使用这样子的什么发帖呀，然讨论呐这样的信息化的这种手段了。

For instance, during a classroom activity, the teacher assigns an interactive task. Student A shares their opinion, and the teacher enables peer reviews. Many students then reply or upvote Student A's post, while your own post gets little attention. Gradually, you'd feel disappointed and might stop using features like posting or discussions.

19:03 Respondent 5

这个我不会不会好。

No, I wouldn’t.

19:06 Researcher

那么下面一个叫抑郁。啊，抑郁啊，就是说你会无形之中。把自己的和别人的进行一个比较。然然后有的时候会去，当你面对别人的比你好的时候。你会觉得自己不如他人。

Next is depression. Hmm, depression—this isn’t the clinical term but rather the English word "depression," closer to "disappointment" but with a different nuance. It’s when you unconsciously compare yourself to others and feel inferior when others perform better.

19:25 Respondent 5

就是有这种心理是吧，对。但是不至于中错呀。

So, it’s that kind of psychology, right? But it wouldn’t lead to intermittent dropout.

19:33 Researcher

啊就是轻微的对吧。

Ah, so it’s mild, right?

19:35 Respondent 5

就是呃就是就比如说呃同样一件事情可能或者同样一个。教学任务别人做的比我好，这个我可能会就是说。呃，觉得自己可能在这个方面有不足吧，或者是怎么样，但是不至于让我是说中错。

Yeah, like if someone does better on the same task, I might feel I’m lacking in that area, but it wouldn’t make me quit.

19:53 Researcher

嗯，OK, 好，那就没有抑郁，下面就是害怕。害怕害怕的话，这个哦，还有我们说这个抑郁啊，其实它并不是我们医学角度说的那个抑郁，它因为它是英语翻译过来的，它其实英英文的话，它应该叫depression。Depression, depression就是有点类似于像disappointment，但是它和disappointment那那个侧重不一样。所以明白，哎，就是就是我们说depression，depression, 你有没有，会不会因为depression然后让你去dropout。

Well, OK, good, then there's no depression, next is fear. Fear, fear, well, and when we talk about this depression, actually it's not the depression we refer to from a medical perspective, because it's translated from English, in English it should be called depression. Depression, depression is somewhat similar to disappointment, but its emphasis is different from disappointment. So understand, well, that is, we say depression, depression, do you have it, would it make you dropout because of depression.

20:30 Researcher

不会不会，OK, 那下面一个就是害怕害怕啊你你会会不会担心，就是说自己这个。呃，表现不够好，会产生一些不必要的一些误会，让你自己觉得很害怕。

No no, OK, then the next one is fear fear ah you you will will worry, that is to say, yourself this. Uh, performance is not good enough, will produce some unnecessary misunderstandings, make yourself feel very afraid.

20:45 Respondent 5

就是。自己在教学的过程中，呃，老师授课的课堂表现不怎么样，然后从而害怕使用这个软件进行学习是吧。

Like... performing poorly in class and then being afraid to use the software for learning?

20:57 Researcher

啊呃更多的话就是出现在你在使用这个软件过程当中，因为自己的一些呃表现不够好。所以你担心会，你担心和害怕会产生不必要的一些误会。或者是别人对你产生一些啊，你不愿意你不期待的这种的看法。这种是我们把它界定为害怕的，嗯，不存在害怕。好，那就是担忧担忧啊叭如说啊，虽然说你学习很好啊，但比如说比如说你们你你们班里面有些同学学习更好，那么你会觉得，那么对面当你面对一个呃全班性的一个呃，都可以参与的这么一个活动时候，由于有些人。

More like fearing unnecessary misunderstandings or unwanted judgments from others due to poor performance while using the software. That’s how we define fear here. No fear? Okay, then worry. For example, even if you’re doing well, some classmates might outperform you. When facing a class-wide activity, you might hesitate to participate because you’re worried about saying the wrong thing or not expressing yourself clearly.

21:44 Researcher

他会比你更好，甚至说你更尊敬他的话，那么你会嗯，面对这样子的，呃活动时候，你会选择。由于担心说错话或者是。嗯，表达的不不够清晰，不够标准，所以你会选择。呃，有一种担忧的，担心的这样子的心理。

If he's better than you or even claims you respect him more, when facing such situations during activities, you might choose to... Due to concerns about saying the wrong thing or... Well, expressing things unclearly or not in the most standard way, you'd opt for... This kind of anxious mindset that's always on your mind.

22:09 Respondent 5

就是。就是说有同学比你厉害，然后在这个教学活动中就是会会担心自己的行为不如别人，是这样的吗？

So, it’s about fearing your performance won’t measure up to others’?

22:21 Researcher

啊对担心自己的行为不如别人也会，也可以担心说自己由由于自己的呃表现不够好啊，也有可能担心就是说嗯老师会更喜欢那个学习比你更好的同学，总而言之就担忧啊，那你的表现是什么呢？对于担忧这方面。

Yes, or worrying that the teacher might favor better-performing students. In short, it’s about anxiety. How does this manifest for you?

22:43 Respondent 5

就是就是更多的就是自我焦虑吧，然后就是转化为压力，我觉得是。

It’s more like self-anxiety, which turns into pressure, I think.

22:51 Researcher

呃，那你的自我焦虑的这个原因是什么呢？或者说你这个担忧的源头是什么呢？呃。

What’s the source of this anxiety or worry?

22:57 Respondent 5

就是因为别人比我好嘛，然后就是可能说在这个比如说这个教学过程中会有就是硬性，比如说是考试会觉得比不过别人啊，或者是怎么样，别人就是呃比我厉比我强啊或者怎么样。就是会有这种感觉，一直追不上别人的那种担忧。

Because others are better. Like, in exams or tasks, I might feel I can’t catch up, or others are just stronger. It’s that lingering fear of never measuring up.

23:22 Respondent 5

如果是自己很擅长的课程的话，会有这种，如果是完全自己不擅长的话，那那应该就没有就就是属于那种摆烂心理。就是说，反正就是觉得自己对这门课也不怎么擅长，别人比我好很正常。但如果是自己很擅长的这门课，因为自己对这门课有信心嘛，然后别人比我好，然后就感觉自己呃，可能又赶不上别人。然后但是自己就在觉得这方面就是又不会又就是感觉自己挺有能力的，也不比别人差，但是又。赶不上别人，就是老师又觉得他表现好，那我就会担忧。

If it’s a subject I’m good at, I’d feel this way. If it’s something I’m bad at, I’d just accept it—like, "Of course others are better." But for subjects I’m confident in, if others outperform me, I’d feel like I can’t catch up, even though I think I’m capable. That’s when the worry kicks in.

23:58 Researcher

嗯，对啊，只要你担忧了，那就是负面的，如果你不担忧，那就不是负面的。嗯嗯，担忧啊，所以跟课程关系不大。跟矿难关系不大啊。好，然后下面的话就是气氛。啊呃有有，呃有些人喜，比如说有些人把我想说的话就都发出去了。把我想说的观点提前发出去了。嗯啊，让我很气愤，或者说他喜欢发的某些东西。我不赞成，我也会感觉到很气愤，总而言之，气愤。总而言之，你会不会因为气愤而去弃用这个信息化工具？不会不会好，下面一个，最后一个就紧张。

Right, as long as you’re worried, it’s negative. If not, then it’s not. Worry isn’t tied to the subject itself. Okay, next is anger. For example, if someone posts what I wanted to say first, or shares opinions I disagree with, I might feel angry. Would anger make you abandon the tool? No? Okay. Last one is tension.

24:43 Researcher

很紧张啊，你你参与完你表达过自己的观点，在我们的某个呃在线的可评论的整个教学活动当中啊，你啊，你很期待。别人的这个点赞呃肯定或者是评价，会让自己有的时候感觉到很紧绷。

Tension—after sharing your opinion in an online, commentable teaching activity, you might eagerly await others’ likes, approval, or feedback, which could make you feel tense.

25:04 Respondent 5

就是希望自己的答案被更多人认可，不是这个意思吗？

Like hoping your answer gets more recognition?

25:08 Researcher

哎，对你有没有过？就是因为希望被别人认可，所以说让自己的精神会很紧绷，让自己有一点紧张。

Yes, have you ever felt tense because you wanted others’ approval?

25:17 Respondent 5

会会紧张，但不至于中戳哦。

I’d feel tense, but not enough to quit.

25:20 Researcher

那就如果不至于中戳的话，那就那就不属于我们讨论的范畴。

Then it’s outside our scope.

25:25 Respondent 5

嗯嗯。

Mhm.

25:27 Researcher

好，那我们这个是个科学研究嘛，那我们现在就是通过我们这个，通过我看我们这总共啊我们20多分钟差不多啊，通过我们这么一个就是半结构化的我们这一个访谈，其实我也可以把我们访谈过以后的一个。啊粗线条的，我们那个编码器编码结果可以可以跟你分享一下，就是就是其实能够发现啊，就是说你呃比较少在呃使用，比较少会受到负面情绪带给你放弃和放弃使用我们的信息化教学工具，产生中硕的行为。啊，你更多的会自己会有一种啊自我调试啊，你自我调试其实是很正常的啊，因为呃这是个人的一个应激反应啊啊应应激反应啊，特别是你对于焦虑啊啊焦虑抑郁还有紧张啊这些可能嗯比较容易出现。

Alright, this is a scientific study. We conducted a semi-structured interview lasting about 20 minutes. I can share the rough coding results from our conversation: You rarely abandon or give up using digital teaching tools due to negative emotions. Instead, you tend to self-adjust. This is quite normal as it's a natural stress response, especially when dealing with anxiety, depression, or tension.

26:32 Researcher

呃，负面的比较容易，呃概出现概率比较高的，这样子的负面情绪，你的你的应对措施和策略还是不错的，所以呢啊这些呢都不会对你对你进行困扰，然后。嗯，总体来说的话，你对于这个教学活动啊，你是会参与的，但是由于一些由于我们由于你的部分的这个倦怠。还有沮丧、压力以及不满意和一些担忧会让你屏蔽掉部分这个功能的使用。嗯嗯，所以这就是我们得出来的一个啊，得出来一个粗线条的这么一个结论，就是然后如果再进行一次编码的话，其实就是说你啊。

Negative emotions tend to surface more frequently. While your coping strategies are effective, these challenges won't significantly affect you. You will continue participating in teaching activities, but fatigue, frustration, stress, dissatisfaction, and anxiety may cause you to temporarily disable certain functions. This leads us to a preliminary conclusion: If we conduct another coding analysis, it essentially indicates that...

27:22 Researcher

啊就是你可能更多的受到他们的共同的这个因素的影响。啊共同因素影响，因为因为你能够发现我们这里说是，呃。呃，压力，沮丧，不满意，嗯，他们之间都是有关联性的嘛，那就是说你可能会是因为受到他们一个共同的这个作用，所以让你去啊。做出这样的一个中戳的这么一个决定。

Ah, it's likely that you're more influenced by their shared common factors. The interconnectedness stems from the fact that stress, frustration, dissatisfaction—these elements are all interrelated here. Essentially, you might have been driven to make such a pivotal decision due to their combined effects.

27:49 Respondent 5

嗯。

En

27:50 Researcher

好。所以这就是我们一个研究，就是一个访谈的一个一个结果吧，嗯，跟你分享一下啊，后期的话可能还要让你去做一个问卷。

Okay. So this is one of our research, one of the results of an interview, um, and I'm going to share it with you, and later on we might ask you to do a questionnaire.

28:03 Respondent 5

Ok

## Interview 6

00:00 Researcher
您好，感谢参与本次访谈。我们想了解您使用雨课堂、超星等信息化教学工具的经历，以及情绪对您使用这些工具的影响。回答没有对错，如实分享即可，信息会严格保密。

Hello, thank you for participating in this interview. We would like to understand your experience in using information-based teaching tools such as Rain Classroom and Chaoxing, as well as the impact of emotions on your use of these tools. There are no right or wrong answers—just share your honest experience. All information will be kept strictly confidential.

00:21 Respondent 6
好的，让我想想。

Let me recall it. It is been a while.

00:35 Respondent 6

我用过雨课堂和超星，主要是上课签到、提交作业，偶尔看慕课。

Okay, I have used Rain Classroom and Chaoxing, mainly for class attendance, submitting assignments, and occasionally watching MOOCs.

01:05 Researcher
您用过的还是挺多的，但是否有过中途停止使用这些工具的情况？比如暂时不用、跳过某些功能，或者完全搁置一段时间？

You have used quite a few, but have there been instances where you stopped using these tools midway? Such as temporarily discontinuing use or intermittent dropout, skipping certain features, or completely setting them aside for a period of time?

01:55 Respondent 6
让我想想想。好像是有过的。比如超星有个 “讨论区” 功能，老师会让我们发帖交流，但我很少用。还有一次，连续两周没登雨课堂，因为觉得上面的通知太乱，不想看。

Let me think about it. It seems there was indeed such a situation. For example, Chaoxing has a "Discussion Forum" feature where teachers would ask us to post and interact, but I rarely used it. There was also one time when I didn't log into Rain Classroom for two consecutive weeks because I found the notifications there too messy and didn't want to check them.

02:06 Researcher
您说的 “不看通知” 和 “不用讨论区”，能具体说说原因吗？当前你表述的太笼统了。

You mentioned "not reading notifications" and "not using the discussion forum." Could you elaborate on the reasons? Your current explanation is too vague.

02:31 Respondent 6
超星的讨论区里，有些同学会发很长的回复，带很多专业术语，我觉得自己说不出那么 “厉害” 的话，发了也没人理，就干脆不发了。雨课堂那次是因为考前一周，老师一天发十几条通知，混着作业提醒、复习资料，我越看越乱，索性关掉软件，找同学抄了重点。

In the Superstar discussion forum, some classmates post very lengthy replies filled with professional jargon. I feel like I can't come up with such "impressive" statements, and even if I post, no one responds, so I simply don't post. As for the Rain Classroom incident, it was because during the week before the exam, the teacher sent over a dozen notifications per day, mixing homework reminders with review materials. The more I read, the more confused I became, so I just closed the software and copied key points from classmates.

04：16 Researcher
这种 “不想用” 的情况，是否和情绪有关？比如烦躁、焦虑之类的？

Is this "reluctance to use" situation related to emotions? Such as irritability, anxiety, or similar states?

05:50 Respondent 6
额，额，这个。肯定有。讨论区的事，我当时有点自卑，觉得自己水平不够，属于 “不敢用”；雨课堂那次是纯粹烦躁，信息太多，看不过来就想逃避。

Well, uh, this. Definitely had. About the discussion forum thing, I felt somewhat inferior at the time, thinking my level wasn't good enough—it was a case of "daring not to use"; the Rain Classroom instance was purely out of irritation, with too much information to process, making me want to escape.

06:35 Researcher
好的。我们梳理了几种常见情绪，您可以看看是否有共鸣。比如 “倦怠”—— 因内容太多感到疲惫，“焦虑”—— 担心跟不上别人的进度，“沮丧”—— 遇到技术问题或没得到反馈时的失落。

Okay. We have outlined several common emotions—see if any resonate with you. For example, "burnout"—fatigue from excessive content, "anxiety"—worry about falling behind others' progress, and "frustration"—disappointment when encountering technical issues or receiving no feedback.

07:00 Respondent 6
是这样啊，那么，倦怠和焦虑都有过。比如慕课，一门课有 50 多个视频，老师要求两周看完，我看到第 30 个就不想看了，觉得永远看不完，这算倦怠吧？焦虑的话，看到同学在群里晒 “已完成所有作业”，而我还有一半没做，就会急得不想打开软件。

I see. Well, I've experienced both burnout and anxiety. For example, with MOOCs - when a course has over 50 videos and the teacher requires us to finish them all within two weeks, I'd feel exhausted by the 30th video and think I'd never complete them. That counts as burnout, right? As for anxiety, seeing classmates post in group chats about "having completed all assignments" while I still have half left would make me so anxious that I wouldn't even want to open the software.

08：20 Researcher
那这种焦虑会让您彻底放弃吗？还是会想其他办法？

Does this anxiety make you give up completely? Or will you try other approaches?

08:55 Respondent 6
放弃？额，额，这，这个，好像不会彻底放弃，但会 “摆烂” 一两天。比如上次超星的作业截止前，我看到别人都交了，自己急得做不下去，就先玩了半天游戏，第二天早起赶完的。不过那次之后，我就把软件通知设成了 “仅重要提醒”，免得总被别人的进度干扰。大概就这样吧。

Give up? Uh, uh, well, this, it seems like I wouldn't completely give up, but I might "slack off" for a day or two. For example, before the deadline for the Chaoxing assignment last time, when I saw others had already submitted theirs, I got so anxious I couldn't focus, so I played games for half a day first and then woke up early the next day to finish it. But after that incident, I set my app notifications to "important alerts only" to avoid being constantly distracted by others' progress. That's pretty much it.

09:20 Researcher
哦，原来这样啊，那，那你有没有因为工具本身的问题（比如卡顿、设计不合理）产生负面情绪？

Oh, I see. Well then, have you ever experienced negative emotions due to issues with the tool itself (such as lagging or unreasonable design)?

09:46 Respondent 6
还真的有！雨课堂有时会突然崩溃，写了一半的答题框没保存，当时气得想卸载。还有一次，老师用超星发的 PDF 课件是倒着的，调了半天没弄好，最后干脆不看了，找同学借了笔记。

It really happens! Rain Classroom sometimes suddenly crashes, and the half-finished answer box wasn't saved, which made me so angry I wanted to uninstall it. Another time, the PDF courseware the teacher sent via Chaoxing was upside down. After struggling with it for a long time without fixing it, I simply gave up and borrowed notes from a classmate.

10:32 Researcher
看来确实挺难受啊，那么当您因为这些情绪不想用工具时，有没有什么办法能让您重新开始使用？

It seems really quite uncomfortable. So when you don't feel like using the tool due to these emotions, is there any way that could help you start using it again?

10:55 Respondent 6
主要是靠 “deadline 倒逼”。比如知道再不交作业会扣分，就硬着头皮打开。如果能有提示就好了，比如软件自动整理 “未完成任务”，或者弹出 “你还剩 3 个视频没看，今天看 1 个就好”，可能就不会那么怕了。

It mainly relies on "deadline pressure." For example, knowing that points will be deducted if the assignment isn't submitted, one reluctantly starts working. It would be helpful to have reminders, such as the software automatically organizing "uncompleted tasks" or popping up with "You still have 3 videos left to watch; just watch 1 today," which might make it less daunting.

11:35 Researcher
看来你的压力方法还挺有效果的，那么如果可以给工具设计者提建议，您觉得哪些功能能减少这种 “不想用” 的情况？

It seems your stress management method is quite effective. So if you could offer suggestions to the tool designers, what features do you think could reduce this "reluctance to use" situation?

11：54 Respondent 6
我这个没怎么想过，就是希望少点没用的通知，把作业、课件分清楚；讨论区能加个 “匿名发言”，我这种怕说错话的可能就敢参与了。还有，别总显示 “XX 同学已完成”，感觉像在催命似的……

I haven't really thought much about this, but I just hope to reduce useless notifications and clearly distinguish between assignments and course materials. The discussion forum could add an "anonymous posting" feature—people like me who are afraid of saying the wrong thing might then dare to participate. Also, stop constantly displaying "XX classmate has completed," it feels like being pressured...

12：33 Researcher

那么还挺有意思的，你还有什么需要补充的吗？

Well, that's quite interesting. Do you have anything else to add?

12：51 Respondent 6

嗯，这个就是感觉不喜欢有压力的感觉吧，有压力自己就不那么愿意去用了。

Well, it's just that I don't like feeling pressured. When there's pressure, I'm less willing to use it.

13：10 Researcher

好的。还有吗？

Anything else？

13：35 Respondent 6

目前就这么多了。

That is all so far.

13:50 Researcher

好的。谢谢你。今天就结束了。

Thanks, let’s call it today.

14:00 Respondent 6

My pleasure.

Interview 7

00:00 Researcher

您好，感谢您参与本次访谈。可以听到我的声音吗？

Hello, thank you for participating in this interview. Can you hear my voice?

00：15 Respondent 7

啊，嗯，可以，可以听见的。

Ah, um, yes, yes, it can be heard.

00：30 Researcher

我们正在研究信息化教育工具使用过程中的中辍现象，也就是暂时停止使用后又重新使用的情况，以及情绪对这一行为的影响。您使用过雨课堂、职教云、超星这些工具吧？

We are investigating the phenomenon of discontinuation in the use of information-based educational tools, specifically the intermittent dropout followed by resumed usage, as well as the influence of emotions on this behavior. Have you used tools such as Rain Classroom, Vocational Education Cloud, or Chaoxing?

01:17 Respondent 7

嗯，用过，雨课堂和超星用得比较多，上课、交作业都靠它们。

Yes, I've used them, mainly Rain Classroom and Chaoxing for attending classes and submitting assignments.

02:00 Researcher

看来您使用得还是很频繁的。那您有没有过使用这些工具时中途停下来的情况呢？比如某段时间不用，或者某些功能不用了。

It seems you use them quite frequently. Have you ever intermittent dropout these tools midway? For instance, not using them for a period of time or avoiding certain features.

02:39 Respondent 7

让我想一想，有点一点时间了。啊，想起来了，有的。超星上有个 “课程论坛”，老师让我们在上面讨论问题，我基本没怎么用过。还有一次，雨课堂上的课后测验，我连续三天都没做，后来才补的。

Let me think about it, it's been a while. Ah, I remember now, there was. On Chaoxing, there's a "Course Forum" where the teacher asked us to discuss questions, but I hardly used it. There was also one time with the post-class quizzes on Rain Classroom—I didn't do them for three consecutive days and only made them up later.

03:48 Researcher

看来当时你还有点“忙”啊，忙于补作业。那么你能说说为什么不用 “课程论坛”，还有没及时做课后测验吗？

It seems you were a bit "busy" back then, busy catching up on homework. So could you explain why you didn't use the "course forum" and why you didn't complete the post-class quizzes on time?

04:12 Respondent 7

哈哈，有点有点，不是太好的习惯哈。这个“课程论坛” 里好多同学说的都挺专业的，我怕自己说不好，被别人笑话，就不敢发言。课后测验那次是因为当时要复习别的科目，感觉没时间做，看着雨课堂上的提醒就烦，索性就没打开软件。

Haha, a little bit, it's not a very good habit. Many classmates in this "Course Forum" speak quite professionally, and I'm afraid of saying something wrong and being laughed at, so I don't dare to post. As for that post-class quiz, it was because I needed to review other subjects at the time and felt I didn't have time to do it. Seeing the reminders on Rain Classroom annoyed me, so I simply didn't open the software.

05:13 Researcher

这种情况是不是和情绪有关呢？比如担心、烦躁之类的。

Is this situation related to emotions? Such as worry, irritability, and the like.

05:40 Respondent 7

情绪？情绪的话，实话实说，肯定有关啊。不敢在论坛发言是因为紧张、担心。没做测验是觉得烦躁，压力大。

Emotions? To be honest, emotions are definitely involved. The reason I don't dare to post on forums is because of nervousness and worry. Not taking the test is due to feeling irritable and under pressure.

06:36 Researcher

好的。为了更好理解，我们总结了一些常见的负面情绪，您看看有没有类似的感受。比如倦怠，因为信息太多觉得累；焦虑，担心跟不上进度；沮丧，遇到难题或没做好时的失落。

Okay. To better understand, we have summarized some common negative emotions. Please see if you have similar feelings. For example, burnout—feeling tired due to excessive information; anxiety—worrying about falling behind schedule; frustration—feeling disheartened when encountering difficulties or not performing well.

06:59 Respondent 7

这么多啊。这个。。。这个。。。好像都有过。超星上一门课的资料特别多，课件、视频、拓展阅读堆在一起，看一会儿就觉得倦怠，不想看了。看到别的同学在雨课堂上很快完成了互动答题，自己还没思路，就会焦虑。这些算吗？嗯，还有，还有就是有时候提交的作业分数不高，也会沮丧，不想再打开软件看反馈。

There's so much. This... this... seems like I've experienced them all. On Chaoxing, the materials for one course are particularly abundant—courseware, videos, and extended readings all piled together. After looking at them for a while, I feel fatigued and don't want to continue. Seeing other classmates quickly complete interactive quizzes on Rain Classroom while I still have no ideas makes me anxious. Do these count? Hmm, also, sometimes when the scores for submitted assignments aren't high, I feel frustrated and don't want to open the software to check the feedback.

08:26 Researcher

感谢你的分享这么多，既然有这些影响，那这些情绪会让您彻底放弃使用这些工具吗？

Thank you for sharing so much. Given these impacts, would these emotions make you completely give up using these tools?

08:50 Respondent 7

那到不至于，我还想通过课程考核啊。哈哈，所以不会彻底放弃，毕竟老师布置的任务还得完成。但会拖延，比如作业快截止了才急急忙忙去做，或者只挑简单的功能用，复杂点的就避开。

It's not that bad, I still want to pass the course assessment. Haha, so I won't completely give up, after all, the tasks assigned by the teacher still need to be completed. But I will procrastinate, like rushing to do the homework when the deadline is approaching, or only picking the simple functions to use and avoiding the more complex ones.

09:43 Researcher

有没有什么办法能让您在这种时候重新好好使用这些工具呢？

Is there any way to make you properly utilize these tools again under such circumstances?

09:56 Respondent 7

嗯，我想想，这个问题怎么回答你哈。嗯，这个。对了，有时候老师会在课堂上强调这些工具的重要性，或者同学提醒我有新任务，我就会重新打开用。还有就是自己调整心态，告诉自己先把简单的做好，慢慢就进入状态了。

Well, let me think, how should I answer this question. Hmm, this. Right, sometimes the teacher emphasizes the importance of these tools in class, or classmates remind me of new tasks, and then I'll reopen them to use. Also, I adjust my mindset by telling myself to start with the simple tasks first, and gradually I'll get into the groove.

11:33 Researcher

您觉得这些信息化教育工具在设计上有什么可以改进的地方，能减少这种中途停下来的情况呢？

What aspects of the design of these digital education tools do you think could be improved to reduce such instances of mid-process interruptions?

11:59 Respondent 7

这个问题，有点难回答啊。我就按照自己的想法来说可以不？就是，就是，希望超星能把资料分分类，标上重点，看起来就没那么乱了。雨课堂的互动答题能不能给点提示，别让我太焦虑。还有 “课程论坛”，要是能匿名发言就好了，我可能就敢说了。

This question is a bit difficult to answer. Can I just share my thoughts? Well, I hope Chaoxing could categorize the materials and mark the key points, so it wouldn't look so messy. For Rain Classroom's interactive Q&A, could you give some hints to ease my anxiety? Also, for the "Course Forum," it would be great if we could post anonymously—maybe then I'd dare to speak up.

12:46 Researcher

对工具本身的设计、功能有过强烈的不满吗？还有什么建议或者想法呢？

Have you ever had strong dissatisfaction with the design or functionality of the tool itself? What other suggestions or ideas do you have?

13:28 Respondent 7

太有了！职教云的 “视频倍速” 功能简直反人类。它最多只能调到 1.2 倍速，而且快进后声音会变调，像机器人说话。有次老师发了个 2 小时的录播课，要求一周内看完，我想快点看完赶论文，结果调了 1.2 倍速根本听不清，调回原速又太费时间。当时对着屏幕里卡顿的画面，真的特别不满意 —— 为什么别的平台能调 2 倍速，就它这么死板？最后我找同学要了笔记，硬是没看那个视频，现在想起职教云的倍速设计都觉得烦。

Absolutely! The "video playback speed" feature on ZhiJiaoYun is downright anti-human. It only goes up to 1.2x speed, and the audio becomes distorted after fast-forwarding, sounding like a robot speaking. Once, a teacher posted a 2-hour recorded lecture requiring us to finish it within a week. I wanted to speed through it to work on my paper, but at 1.2x speed, the audio was completely unintelligible, while the original speed was too time-consuming. Staring at the choppy footage on the screen, I was utterly frustrated—why can other platforms support 2x speed while this one remains so rigid? In the end, I borrowed notes from a classmate and skipped the video entirely. Even now, just thinking about ZhiJiaoYun's speed design irritates me.

15:26 Researcher

这些不满会让您彻底放弃使用吗？还是会想别的办法？

Will these dissatisfactions make you completely give up using it? Or will you consider other alternatives?

16:00 Respondent 7

不会彻底放弃，但会 “钻空子”。比如超星互评我后来只给熟人打分，避免被乱评价；雨课堂答题前先搜搜同学的答案，确认差不多了再发；职教云的视频就开着静音挂后台，反正它只检测时长。其实也知道这样不对，但被那些情绪影响后，就不想再 “认真” 用了，能应付过去就行。

I won't completely give up, but I'll "exploit loopholes." For example, in the Chaoxing peer evaluation, I later only rated acquaintances to avoid random assessments; before answering questions on Rain Classroom, I'd first search for classmates' answers and submit only after confirming they were roughly correct; for videos on Vocational Education Cloud, I'd just mute them and run in the background since it only tracks viewing duration. I know this isn't right, but after being affected by those negative emotions, I no longer wanted to use these platforms "seriously"—just getting by was enough.

17:46 Researcher

好的，非常感谢您的分享，对我们的研究很有帮助。

Okay, thank you very much for your sharing, it has been very helpful for our research.

18:01 Respondent 7

不客气。

You are welcome.

Interview 8

00：00 Researcher:

喂喂，能够听清楚我的声音吗？

Hello hello, can you hear my voice clearly?

00：10 Respondent 8

啊，啊，可以，可以的。咱们这个访谈是为什么啊？

Ah, ah, yes, yes. What is the purpose of this interview of ours?

00：25 Researcher

感谢你抽出时间来参加这次访谈。我先简单介绍一下目的。我们今天主要是想了解一下你在使用教育技术工具（比如雨课堂、学习管理系统等）时的感受，特别是那些可能让你感到不舒服或者想要放弃的情况。你可以先简单介绍一下你平时使用这些工具的频率和方式吗？

Thank you for taking the time to participate in this interview. Let me briefly explain the purpose. Today, we mainly want to understand your feelings when using educational technology tools (such as Rain Classroom, learning management systems, etc.), especially those situations that may have made you feel uncomfortable or inclined to give up. Could you first briefly introduce how frequently and in what ways you typically use these tools?

01:10 Respondent 8:

原来是问这个哈，之前x老师找到我，但没有说是什么事情。

So that's what this is about. Previously, Professor X approached me but didn't specify what it was regarding.

01：20 Researcher

是的，我们在招募志愿者，现在和你说明目的，可以吗？

Yes, we are recruiting volunteers. Now let me explain the purpose to you, is that okay?

01：40 Respondent 8

好的，好的，可以的。嗯，我大概每周都会用雨课堂上课，主要是用来提交作业和查看课程资料。有时候也会用学习管理系统看看课程公告和作业要求。

Okay, okay, that's fine. Well, I usually use Rain Classroom for classes every week, mainly to submit assignments and check course materials. Sometimes I also use the learning management system to view course announcements and assignment requirements.

02：20 Researcher:

你主要用它来完成公告和作业，对吗？

You mainly use it to complete announcements and assignments, right?

02：30 Respondent8

对主要是，也在上面上课呢，老师会布置课前任务和课堂互动什么的。反正还挺重要的。

The main thing is, classes are also conducted online, where teachers assign pre-class tasks and in-class interactions. Anyway, it's quite important.

02：55 Researcher

请你回忆一下，那你在使用这些工具的过程中，有没有遇到过让你觉得不舒服或者想要放弃的情况呢？

Please recall, during your use of these tools, have you ever encountered situations that made you feel uncomfortable or made you want to give up?

03：10 Respondent 8:

啊呀，这个啊，这么说还挺多的。哈哈，能说吗？哈哈。有啊，有时候雨课堂上的作业特别多，而且有些题目很难，我做起来很吃力。看着那些已经完成作业的同学在群里讨论，我就特别焦虑，感觉自己怎么也做不完。有一次，我连续三天都在做作业，但还是没做完，最后实在没办法，只能匆忙提交了。

Oh dear, this one... well, there's actually quite a lot to say about it. Haha, can I really talk about it? Haha. Yes, sometimes there are an overwhelming number of assignments on Rain Classroom, and some of the questions are extremely difficult, making it really tough for me to complete them. Seeing classmates who've already finished discussing their work in the group chat makes me especially anxious—I feel like I'll never get through it all. There was one time I spent three straight days working on assignments but still couldn't finish them. In the end, I had no choice but to submit them hastily.

04：20 Researcher:

听起来你当时压力挺大的。那这种焦虑情绪有没有让你想过要放弃使用雨课堂呢？

It sounds like you were under a lot of pressure at that time. Did this anxiety ever make you consider giving up on using Rain Classroom?

04：42 Respondent 8:

倒没有想过完全放弃，没有完全放弃，考试还是要考的。哈哈。怎么说呢？但那段时间我确实不太愿意打开雨课堂，看到那些未完成的作业提醒就有点心烦。但不是很严重吧。只能说有点一点影响。

I never really thought about giving up completely, not completely giving up, I still have to take the exams. Haha. How should I put it? But during that time, I really didn't feel like opening the Rain Classroom, seeing those unfinished homework reminders was a bit annoying. But it wasn't too serious. Just a slight impact, I'd say.

05：43 Researcher:

我理解你的感受。除了焦虑，你有没有遇到过其他让你不舒服的情绪呢？比如倦怠、嫉妒或者沮丧之类的？

I understand how you feel. Besides anxiety, have you experienced any other emotions that made you uncomfortable? Such as burnout, jealousy, or frustration?

06：01 Respondent 8

倦怠和妒嫉？妒嫉别人？这个不太好吧。

Fatigue and jealousy? Being jealous of others? That's not very good.

06：20 Researcher

倦怠就是你自己认为自己在使用过程中感觉有些疲乏或者疲劳，比如想歇一下。嫉妒当时不是我们日常生活中的那种意义，只是指在信息化教学过程中的，你的某一个瞬间的感受，这是很正常的感受，你可以如实分享。

Burnout refers to your own perception of feeling somewhat exhausted or fatigued during usage, such as wanting to take a break. Jealousy here does not carry the everyday meaning in our daily lives; it specifically denotes a momentary feeling you experience during the process of information-based teaching. This is a very normal sensation, and you can share it honestly.

06：55 Respondent 8:

原来是这样啊。那么的话呢，倦怠倒是没有，但嫉妒是有的。有时候看到别的同学在课堂互动环节回答问题特别好，老师还表扬他们，我就觉得自己怎么也做不到那么好，心里有点不舒服。

I see. In that case, I don't feel burnout, but I do experience jealousy. Sometimes when I see other classmates answering questions exceptionally well during class interactions and receiving praise from the teacher, I feel like I can never perform that well, which makes me a bit uncomfortable.

07：25 Researcher:

感谢你的坦诚回答。那这种嫉妒情绪有没有影响到你参与课堂互动的积极性呢？

Thank you for your honest answer. Has this feeling of jealousy affected your enthusiasm for participating in classroom interactions?

07：49 Respondent 8:

有一点吧。有时候我就不愿意主动回答问题了，怕自己答不好被别人笑话。

A little bit. Sometimes I just don't want to actively answer questions, afraid that I might not answer well and be laughed at by others.

08：16 Researcher:

原来是这样的。明白了。那你觉得有没有什么方法可以帮助你克服这些负面情绪，更好地使用这些教育技术工具呢？

So that's how it is. Understood. Then do you think there are any methods that could help you overcome these negative emotions and better utilize these educational technology tools?

08：33 Respondent 8

这个问题好难回答啊

This question is really difficult to answer.

08：49 Researcher

没关系的。你自己回忆，如实告知就好了。

It's okay. Just recall and tell the truth.

09：01 Respondent 8

我觉得我自己也有一些问题吧。我原来是中职升上来的嘛。英语不是很好，或者基础不太好吧。老师用这些信息化手段上课还挺好的。就是自己有的时候不太能听得懂吧。但我现在尽量听懂吧。希望老师能对我们基础差的同学，讲解更详细一些吧。我挺想多知道一些语法知识的。

I think I also have some issues myself. I originally came from a vocational secondary school, so my English isn't very good, or rather my foundation is quite weak. The teachers using these information-based teaching methods in class is actually quite good. It's just that sometimes I can't quite understand. But now I'm trying my best to comprehend. I hope the teacher could explain things more thoroughly for students with weaker foundations like us. I really want to learn more about grammar knowledge.

10：16 Researcher

很好，你说得很好。还有其他的嘛？有关信息化学习都可以哦。

Very good, you said it very well. Is there anything else? Anything related to technology assisted learning would be fine.

10：40 Respondent 8

任何都可以嘛？

Anything is okay?

10：55 Researcher

当然咯，与主题相关都可以啊。

Of course, anything related to the topic is fine.

11：10 Respondent 8

嗯，我觉得还有教师吧，你像我们班，一个班六十多个人，我到现在人都认不全，哈哈。上课的时候老师让我们做小组互动，我都不认识咋做啊，每次硬着头皮做，还有人不干，气死我了。

Well, I think teachers are also part of it. Take our class for example—there are over sixty students in one class, and I still can't recognize everyone, haha. During class when the teacher asks us to do group interactions, I don't even know how to proceed since I'm not familiar with them. Every time I just force myself to participate, and some people don't even cooperate, which really annoys me.

12：30 Researcher

这个是个有点问题。哈哈，你这也是一个问题。还有其他的嘛？

This is a bit problematic. Haha, this is also a question. Are there any others?

12：50 Respondent 8

还有的话还是和班级有关吧。我班这么多人，有时候想知道自己的回答对不对，问问老师都不一定能轮上我。差不多每两次课能轮到一次吧。每节课不一定。

It probably still has something to do with the class. With so many students in my class, sometimes when I want to know if my answer is correct, asking the teacher doesn't necessarily mean I'll get a turn. It's about once every two classes that I get a chance. It's not guaranteed every class.

13：40 Researcher

也就是说班级人数对你来说影响得到正向反馈，会让你中辍嘛？

In other words, does the class size affect your likelihood of receiving positive feedback and lead you to drop out?

14：00 Respondent 8

嗯 这么说的话，还真有，反正老师都叫不到我，不用也行啊。

Well, if you put it that way, there really is no need. After all, the teacher never calls on me anyway, so it's fine not to use it.

14：30 Researcher

这倒也是需要注意的问题。信息化技术就是为了让你们有更好及时反馈的啊。

This is indeed an issue that requires attention. The purpose of information technology is precisely to enable you to have better and more timely feedback.

15：02 Respondent 8

我知道。但我可能是一个比较传统的人吧。我还是喜欢老师能够面对面的指导吧。有的问题AI回复得我也不是能看得很懂。

I know. But perhaps I'm a rather traditional person. I still prefer face-to-face guidance from teachers. Some of the AI's responses aren't very clear to me either.

15：20 Researcher

确实会遇到这样的困境。那么回到我们的有关情绪的主题上来。你觉得从情绪干预教育对老师提哪些建议？

Indeed, such dilemmas are often encountered. So let us return to our topic concerning emotions. What suggestions would you propose regarding emotional intervention education for teachers?

15：55 Respondent 8:

我觉得如果老师能在课堂上多鼓励我们，不要只表扬那些表现好的同学，可能会好一些。还有，如果雨课堂能有一些提醒功能，比如提醒我还有多少时间完成作业，可能就不会那么焦虑了。

I think it would be better if the teacher could encourage us more in class and not just praise those students who perform well. Also, if the Rain Classroom could have some reminder features, such as reminding me how much time I have left to complete my homework, it might not be so anxiety-inducing.

16：40 Researcher:

好的，非常感谢你的分享，这对我们很有帮助。

Okay, thank you very much for sharing, this is very helpful to us.

17：02 Respondent 8

不用谢。

You're welcome .

Interview 9

00：00 Researcher:

你好，感谢你接受这次访谈。我们想了解一下你在使用教育技术工具时的感受，特别是那些可能让你感到不舒服或者想要放弃的情况。你可以先简单介绍一下你平时使用这些工具的频率和方式吗？

Hello, thank you for accepting this interview. We would like to understand your feelings when using educational technology tools, especially those situations that may have made you feel uncomfortable or inclined to give up. Could you first briefly introduce how frequently and in what ways you typically use these tools?

00：40 Researcher

（waiting)

你好，你在吗？能够听到我的声音嘛？

(waiting)

Hello, are you there? Can you hear my voice?

00：45 Respondent 9

不好意思，刚才我的网络延时了，您找我有什么事情嘛？

I'm sorry, my network was delayed just now. What can I do for you?

01：10 Researcher

没关系。我再重复一边。首先感谢你能接受我的的访谈。我的目的是通过访谈，来了解你对于教育技术工具，在线工具等的使用感受，特别是可能让你感觉不舒服或者放弃的瞬间。那么请你先介绍一下常用工具和使用情况，可以吗？

Never mind. Let me repeat it again. First of all, thank you for accepting my interview. My purpose is to understand your experience with educational technology tools, online tools, etc., through this interview, especially moments that may have made you feel uncomfortable or led you to give up. So, could you please start by introducing the tools you commonly use and your usage patterns?

01：33 Respondent 9

您是指什么，我还没有特别清楚。

What do you mean? I'm not entirely clear yet.

01：52：Researcher

好的，就比如说目前很多学校都会使用MOOC或者雨课堂平台来上课和准备课堂资料，收集同学们的课堂反馈。

Well, for example, currently many schools use MOOC or Rain Classroom platforms for conducting classes, preparing teaching materials, and collecting students' classroom feedback.

02：26 Respondent 9

好的。我大概明白了。谈谈自己的情况，对吗？

Okay. I roughly understand. Talk about my own situation, right?

02：36 Researcher

是的。请畅所欲言。

Yes. Please feel free to speak your mind.

02：43 Respondent 9:

嗯，我大概每周都会用学习管理系统查看课程资料和作业要求，也会用雨课堂提交作业和参加课堂互动。有时候还会用一些在线学习平台看课程视频。

Well, I usually check course materials and assignment requirements on the learning management system every week, and also use Rain Classroom to submit assignments and participate in class interactions. Sometimes I also watch course videos on some online learning platforms.

03：35 Researcher:

看起来你使用还挺多的。你的感受估计也很多吧。你感觉如何？那你在使用这些工具的过程中，有没有遇到过让你觉得不舒服或者想要放弃的情况呢？

It seems you've been using it quite a lot. You must have many feelings about it. How do you feel? During your usage of these tools, have you encountered any situations that made you uncomfortable or made you want to dropout for a while?

04:00 Respondent 9

还挺好用的吧。比原来的（没有在线信息化技术辅助的课堂）要方便点吧。就是之前老师都注意不到我。因为我个子比较矮嘛。老师点名都不一定能点名到我，我也听不清老师说什么。有了在线平台后，我可以在手机上看老师板书，还有音响把老师声音放大了，我可以听清楚了。也能够交流一些吧。

It's quite useful, isn't it? It's a bit more convenient than before (classes without online information technology assistance). Previously, teachers hardly noticed me. Since I'm quite short, even when teachers called roll, they might not reach my name, and I couldn't hear clearly what the teacher was saying. With the online platform, I can now view the teacher's notes on my phone, and the audio system amplifies the teacher's voice so I can hear clearly. It also allows for some interaction.

05：10 Researcher

那挺好的。说明你还挺喜欢使用这些在线平台的。

That's good. It shows you quite enjoy using these online platforms.

05：18 Respondent 9

是的。哈哈。挺好用的。

Yes. Haha. Quite useful.

05：26 Researcher

正如我说的本次研究是想了解，你是否有过一些不愉快的使用经历，以至于让你想暂时中辍或者暂时暂停使用的。如果有，请分享。我们会保密。

As I mentioned, this study aims to understand whether you have had any unpleasant experiences that made you want to temporarily discontinue or pause usage. If so, please share. We will keep it confidential.

06：08 Respondent 9:

不愉快？那就是不满意的地方嘛？

Unhappy? So that means there are points of dissatisfaction, right?

06：12 Researcher

是的。可以这么理解。

Yes. That can be understood this way.

06：20 Respondent9

有啊，有时候学习管理系统的界面设计很复杂，我找资料的时候特别费劲，很容易就烦躁起来。还有一次，我在雨课堂上做课堂互动题，但是题目特别难，我怎么也答不上来，看着别的同学都答对了，我就特别沮丧，觉得自己太笨了。

Yes, sometimes the interface design of learning management systems is overly complex, making it particularly frustrating when I'm searching for materials. There was also one time when I was doing interactive classroom exercises on Rain Classroom, but the questions were extremely difficult. No matter how hard I tried, I couldn't answer them correctly. Seeing other classmates get them right made me feel especially discouraged, as if I was just too stupid.

07：33 Respondent 9

这样是不是把自己说得太惨了？

Does this make me sound too pathetic?

07：45 Researcher:

嗯，这么说来听起来你当时挺受打击的。但不至于惨吧，这些都是人的正常反馈。那下面我想问问，这种沮丧情绪有没有让你想过要放弃使用这些工具呢？

Well, it sounds like you were quite affected at the time. But it wasn't that bad, right? These are all normal human reactions. Now, I'd like to ask—did this sense of frustration ever make you consider giving up on using these tools?

08：01 Respondent 9:

这个让我详细想想。嗯，嗯，这个，嗯，是的。嗯，这个倒没有想过完全放弃，但那段时间我确实不太愿意参加课堂互动，看到那些互动题目就心烦。但是我还是去学吧，因为大家都在用吧，我觉得自己用用也许就好了。

Let me think about this in detail. Hmm, hmm, well, hmm, yes. Hmm, I never really thought about giving up completely, but during that time I really didn't feel like participating in classroom interactions—seeing those interactive questions just annoyed me. But I'll still go ahead and learn it, since everyone else is using it. Maybe if I try using it myself, things will get better.

08：46 Researcher:

我理解你的感受。原来如此，你还是挺有方法的，能够积极应对的啊。既然我们的主题是有关负面情绪，那么除了沮丧，你有没有遇到过其他让你不舒服的情绪呢？比如倦怠、焦虑或者嫉妒之类的？

I understand how you feel. I see, you do have your ways to cope positively. Since our topic revolves around negative emotions, besides frustration, have you encountered other uncomfortable emotions? Such as burnout, anxiety, or perhaps jealousy?

09：16 Respondent 9

老师，您能解释一下嘛？我不是很清楚，不好说。

Teacher, could you please explain? I'm not very clear about it, it's hard to say.

09：34 Researcher

好的可以啊。比如倦怠，就是当你使用信息化工具比较多了之后，突然觉得不想使用他们了，或者觉得他们对你的学习帮助有限时候觉得累了。焦虑就是有点类似紧张，由于使用信息化工具过程中的某种情况，让自己紧张的感觉，为了放松，可能会选择暂时不用它们的情况。你先回忆这两种情绪会不会影响你吧。

Okay, sure. For example, burnout refers to when you've used information tools extensively and suddenly feel reluctant to use them anymore, or feel tired because you perceive their limited help in your studies. Anxiety is somewhat similar to tension—a feeling of nervousness caused by certain situations while using information tools, which might lead you to temporarily stop using them to relax. First, try recalling whether these two emotions affect you.

10：15 Respondent 9:

焦虑是有的。有时候作业特别多，我担心自己做不完，就特别焦虑。还有，有时候看到别的同学在学习管理系统上发布的作业成果特别好，我就觉得自己怎么也做不到那么好，心里有点嫉妒。

Anxiety does exist. Sometimes when there's an overwhelming amount of homework, I worry about not being able to finish it all, which makes me particularly anxious. Additionally, when I see other classmates posting exceptionally good homework results on the learning management system, I feel like I could never achieve that level of quality, and it stirs up some jealousy in me.

10：55 Researcher

也就是说你会认同焦虑和嫉妒情绪影响你？

That is to say, you would acknowledge that feelings of anxiety and jealousy affect you?

11：00 Respondent 9

是的。

Yes.

11：05 Researcher:

那这种焦虑和嫉妒情绪有没有影响到你完成作业的积极性呢？

Has this anxiety and jealousy affected your motivation to complete homework?

11：32 Respondent 9:

有一点吧。有时候我就不愿意按时提交作业了，想着拖一拖说不定就不用做了。还有，看到别的同学的作业成果好，我就不愿意把自己的作业成果发到学习管理系统上，怕被别人比较。

A little bit. Sometimes I just don't want to submit assignments on time, thinking that if I procrastinate, maybe I won't have to do them. Also, when I see other classmates' excellent assignment results, I'm reluctant to post my own work on the learning management system, afraid of being compared.

12：15 Researcher:

明白了。负面情绪还有一些，比如：愤怒、失望、不满等等。这些会影响你使用信息化工具，从而暂时放弃使用嘛？

Understood. There are still some negative emotions, such as anger, disappointment, dissatisfaction, etc. Could these affect your use of information tools, leading to temporarily abandoning them?

12：51 Respondent

嗯。这个的话我的身高算嘛？

Hmm. In that case, does my height count?

13：11 Researcher

你说说看看，我们再来判断好吗？

Let me hear what you have to say first, and then we can make a judgment, alright?

13：32 Respondent

这个嘛。因为我个子不是很高嘛。之前很多时候听不清老师的讲课，也参加不了课堂活动嘛，自己比较着急，对自己有点失望。现在不是有信息化工具了嘛，比之前好了很多，但是我有的时候打字没有同学们快，班上还有一些同学反应特别快，正确率贼高了，我对自己的答案有时候就有不满了，为什么我不能像他们一样吧。

Well, you see. Because I'm not very tall. In the past, I often couldn't hear the teacher's lectures clearly and couldn't participate in classroom activities, which made me quite anxious and somewhat disappointed in myself. Now with the help of information technology tools, things have improved a lot compared to before. But sometimes I can't type as fast as my classmates, and there are some students in class who react particularly quickly with extremely high accuracy rates. I sometimes feel dissatisfied with my own answers—why can't I be like them?

15：00 Researcher

好的，感谢你的分享，对我们的研究很有帮助。

Okay, thank you for sharing. It has been very helpful for our research.

15：15 Researcher

那么，你觉得有没有什么方法可以帮助你克服这些负面情绪，更好地使用这些教育技术工具呢？能不能说说你的想法？

So, do you think there are any methods that could help you overcome these negative emotions and better utilize these educational technology tools? Could you share your thoughts?

15：52 Respondent 9:

说到这个，我不知道我说的对不对啊，反正我先说一下。从我的使用感受来说，个人上我觉得如果学习管理系统能优化一下界面设计，让我们找资料的时候更方便一些，可能会好一些。还有，如果雨课堂能在课堂互动环节给一些提示，比如题目难度提示或者答题时间提示，可能就不会那么焦虑了。同学们，像我一样的，应该就不会那么容易中辍了。这个也是我们的访谈关心的部分嘛。嗯，我觉得改善这个问题，应该会有帮助吧。

Speaking of this, I'm not sure if what I'm saying is correct, but I'll share my thoughts anyway. From my personal experience, I feel that if the learning management system could optimize its interface design to make it easier for us to find materials, it might be better. Additionally, if Rain Classroom could provide some prompts during interactive sessions, such as difficulty indicators for questions or time reminders for answering, it might reduce anxiety. Students like me probably wouldn't be as prone to dropping out then. This is also part of what our interviews are concerned about. Well, I think improving these issues would be helpful.

17：50 Researcher:

好的，非常感谢你的分享，这对我们很有帮助。

Okay, thank you very much for sharing. This is very helpful for us.

18：06 Respondent

不客气。我很高兴能够帮上忙

You're welcome. I'm very glad to have been of assistance.

Interview 10

00：00 Researcher

你好，能听见我的声音嘛？

Hello, can you hear my voice?

00：10 Respondent 10

可以，老师好，能够听到，很清楚。

Yes, hello professor, I can hear you very clearly.

00：20 Researcher

好的，接下来，可能要占用你大约半小时时间做一个学术研究目的的访谈，可以嘛？

Okay, next, it may take about half an hour of your time for an interview for academic research purposes, is that alright?

00：46 Respondent 10

可以的。我知道访谈的，之前在做xx课程调查的时候，我们小组就被访谈过的。

Sure. I'm familiar with interviews - our group had been interviewed before when conducting the xx course survey.

01：12 Researcher

好的。你的这些经历将会对我们的这次研究提供有效帮助的。

Okay. Your experiences will provide valuable assistance to our current research.

01：38 Respondent 10

老师，我准备好了，可以开始了。

Teacher, I am ready, we can begin.

02：16 Researcher:

你好，感谢你接受这次访谈。我们想了解一下你在使用教育技术工具时的感受，特别是那些可能让你感到不舒服或者想要放弃的情况。你可以先简单介绍一下你平时使用这些工具的频率和方式吗？

Hello, thank you for accepting this interview. We would like to understand your feelings when using educational technology tools, especially those situations that may have made you feel uncomfortable or inclined to give up. Could you first briefly introduce how frequently and in what ways you typically use these tools?

02：51 Respondent 10

嗯，这个，我想想。老师，你说的不舒服之类情况，我不太理解。我先说说我用在线网络学习平台的情况吧。我大概每周都会用雨课堂上课，主要是用来提交作业和查看课程资料。有时候也会用学习管理系统看看课程公告和作业要求。

Hmm, let me think about this. Teacher, I don't quite understand what you mean by discomfort or similar situations. Let me first talk about my experience using online learning platforms. I use Rain Classroom for classes almost every week, mainly to submit assignments and check course materials. Sometimes I also use the Learning Management System to view course announcements and assignment requirements.

04：11 Researcher:

好的。谢谢你刚分享自己的使用频率，能看出来你使用还是比较多。我们这里指的哪些不舒服情况，是指在信息过载的时候，我们的人脑会自动开启保护机制，及时阻断过多的信息进入，此时在信息化场景下，就会出现暂时性的停止使用信息化工具的情况发生。那你在使用这些工具的过程中，有没有遇到过让你觉得不舒服或者想要放弃的情况呢？

Okay. Thank you for just sharing your frequency of use—it seems you use it quite often. The discomfort situations we refer to here occur when information overload triggers our brain's automatic protective mechanism, temporarily blocking excessive information input. In such digital scenarios, this manifests as a momentary discontinuation of using digital tools. During your usage of these tools, have you ever encountered situations that made you feel uncomfortable or inclined to give up?

05：21 Respondent 10:

是这样的的意思啊。嗯，嗯，有啊，有时候雨课堂上的作业特别多，而且有些题目很难，我做起来很吃力。还有课堂上，老师的很多问题是限时回答的，有时候我还在想，刚打算把答案分享上网，就结束了。

It means like this. Hmm, hmm, yes, sometimes there are a lot of assignments on Rain Classroom, and some questions are very difficult, making it quite challenging for me to complete them. Also, during class, many of the teacher's questions require timed responses. Sometimes I'm still thinking, just about to share my answer online, when the time runs out.

06：10 Respondent 10

结束了也就结束了吧。但是班上有些同学可能是因为学习比较好吧，他们总能很快回答出来，老师就经常表扬他们，我感觉自己吧就和他们挺有差距的。觉得自己不如他们。

It's over when it's over. But some classmates in the class, probably because they perform better academically, can always answer quickly, and the teacher often praises them. I feel there's quite a gap between me and them, and I think I'm not as good as they are.

07：09 Researcher

那样的情况下，你有什么感受？

In that situation, how do you feel?

07：25 Respondent 10

感受还好吧。你如果非要问的话。我认为就是挺烦躁的。觉得自己不如他们啊。有时候会有点生气和不高兴。总之，好多情绪在一起吧。

I'm feeling okay. If you insist on asking. I think it's quite frustrating. Feeling like I'm not as good as them. Sometimes I get a bit angry and upset. In short, there are a lot of mixed emotions.

08：17 Researcher

也即是说你会有焦虑、生气、失望和沮丧等情绪？

In other words, you will experience emotions such as anxiety, anger, disappointment, and frustration?

08：57 Respondent 10

你这么说，我觉得可能又吧，但不是非常多的的情况，就是有的时候会有。总体来说雨课堂我还是挺喜欢用的。

Hearing you say that, I think it might be possible, but not very often—just occasionally. Overall, I still quite enjoy using Rain Classroom.

09：39 Researcher

既然你刚刚说了，因为看到优秀同学的表现才会自惭形秽。那么有没有可能你会妒嫉他们呢？

Since you just mentioned feeling ashamed of yourself when seeing the outstanding performance of other students, is it possible that you might feel jealous of them?

10：10 Respondent 10

额，这个，这个。

Well

10：23 Researcher

没关系的。全程保密的。而且你如实说就可以了。

It's okay. The entire process is confidential. And you just need to speak honestly.

11：00 Respondent 10

有一点点吧。也不能完全说是嫉妒吧，我感觉羡慕成分更多一些吧。我挺羡慕那些学习好的同学。因为我以前（中学阶段）基础不是很好，就一直比较怕英语，而且虽然自己也一直努力，但我知道和他们的差距吧。所以那些基础好的同学我觉得他们不错。

A little bit. I wouldn't say it's entirely jealousy—I think there's more admiration in it. I really admire those classmates who excel academically. Because my foundation (during middle school) wasn't very strong, I've always been somewhat afraid of English. Even though I've been putting in effort, I'm aware of the gap between me and them. So I think those with a solid foundation are doing great.

11：50 Researcher

那很好，说明你在努力，那样你也在进步吧。

That's good, it shows you're making an effort, so you must be making progress too.

12：30 Researcher:

那这种嫉妒情绪有没有影响到你参与课堂互动的积极性呢？

Has this feeling of jealousy affected your enthusiasm for participating in classroom interactions?

12：55 Respondent 10:

有一点吧。有时候我就不愿意主动回答问题了，怕自己答不好被别人笑话。

A little bit. Sometimes I just don't want to actively answer questions, afraid that I might not answer well and be laughed at by others.

13：36 Respondent 10

有一些吧。但是和他们比，还是有差距吧。有时候看赶不上就不想学了。这是不是就是老师您说的中辍？

There are some. But compared to them, there's still a gap. Sometimes when I see I can't catch up, I don't feel like studying anymore. Is this what you, teacher, referred to as dropping out?

14：25 Researcher

是的。你已经受到了它们的影响了。另外，其他方面呢？

Yes. You have already been influenced by them. What about other aspects?

14：44 Respondent 10

其他方面就是，我不是想赶上他们嘛。就着急啊，越着急好像越不行。

In other aspects, it's just that I wanted to catch up with them. So I got anxious, and the more anxious I became, the worse it seemed to go.

15：22 Researcher:

听起来你当时压力挺大的。那这种焦虑情绪有没有让你想过要放弃使用雨课堂呢？

It sounds like you were under a lot of pressure at that time. Did this anxiety ever make you consider giving up on using Rain Classroom?

15：40 Respondent 10:

倒没有想过完全放弃，但那段时间我确实不太愿意打开雨课堂，看到那些未完成的作业提醒就心烦。

I never really thought about giving up completely, but during that time I was indeed reluctant to open the Rain Classroom platform. Seeing those reminders of unfinished assignments just made me upset.

16：20 Researcher:

明白了。那你觉得有没有什么方法可以帮助你克服这些负面情绪，更好地使用这些教育技术工具呢？

Understood. So do you think there are any methods that could help you overcome these negative emotions and better utilize these educational technology tools?

16：39 Respondent 10:

我觉得如果老师能在课堂上多鼓励我们，不要只表扬那些表现好的同学，可能会好一些。还有，如果雨课堂能有一些提醒功能，比如提醒我还有多少时间完成作业，可能就不会那么焦虑了。

I think it would be better if the teacher could encourage us more in class and not just praise those students who perform well. Also, if the Rain Classroom could have some reminder features, such as reminding me how much time I have left to complete my homework, it might not be so anxiety-inducing.

17：21 Researcher:

好的，非常感谢你的分享，这对我们很有帮助。

Okay, thank you very much for sharing. This is very helpful to us.

17：26 Respondent 10

没关系的老师。

It's alright, Sir.

Interview 11

00:00 Researcher

您好，感谢接受本次访谈。我们想了解您在使用教育技术工具时的感受，特别是那些可能让您感到不适或产生放弃倾向的情况。能否先简要介绍一下您通常使用这些工具的频次及方式？

Hello, thank you for accepting this interview. We would like to understand your feelings when using educational technology tools, especially those situations that may have made you feel uncomfortable or inclined to give up. Could you first briefly introduce how frequently and in what ways you typically use these tools?

00:55 Respondent 11

好的，我每周通常使用雨课堂上课，主要是提交作业和查看课程资料。有时也会用学习管理系统查看课程公告和作业要求。

Okay, I usually use Rain Classroom for classes every week, mainly to submit assignments and check course materials. Sometimes I also use the learning management system to view course announcements and assignment requirements.

01:40 Researcher

看起来你使用得相当频繁。是否曾遇到过任何不愉快的状况，让你想要暂时中断或暂停使用？

It seems you use it quite frequently. Have you ever experienced any unpleasant situations that made you want to temporarily discontinue or pause your usage?

02:01 Respondent 11

让我想想。确实，有时学习管理系统里的通知太多时，我会感到不堪重负而不愿查看。还有雨课堂的互动环节中，如果问题太难，我会感到焦虑，有时甚至直接放弃作答。很多时候我依靠我自己。

Let me think. Yes, sometimes when there are too many notifications on the learning management system, I feel overwhelmed and don't want to check them and I am on my own. Also, during Rain Classroom's interactive sessions, if the questions are too difficult, I feel anxious and sometimes even give up answering.

02:30 Researcher

因此，这些负面情绪影响了您使用这些工具的意愿。您是完全停止使用它们了，还是仅仅避开某些功能？

So, these negative emotions have affected your willingness to use these tools. Have you ever completely stopped using them, or just intermittent dropout certain features?

03:09 Respondent 11

我并没有完全停止使用它们，但确实会避开某些功能。例如，我很少参与讨论论坛，因为害怕说错话或表达不够清晰。

I haven't completely stopped using them, but I do avoid some features. For example, I rarely participate in the discussion forums because I'm afraid of saying something wrong or not being clear enough.

03:30 Researcher

我明白了。那么，你认为这些负面情绪如何影响你的学习体验？对于如何更好地利用这些教育技术工具，你有什么建议吗？

I see. So, how do you think these negative emotions impact your learning experience? Do you have any suggestions on how to better utilize these educational technology tools?

03:57 Respondent 11

负面情绪确实会影响我的学习动力。至于如何改进这些工具的使用，我认为教师可以提供更多指导和鼓励。此外，如果平台能提供更人性化的功能，比如分步教程或个性化推荐，可能有助于缓解焦虑并提升整体学习体验。

Negative emotions can definitely affect my motivation to learn. As for improving the use of these tools, I think teachers could provide more guidance and encouragement. Also, if the platforms could offer more user-friendly features, like step-by-step tutorials or personalized recommendations, it might help reduce anxiety and improve the overall learning experience.

04:14 Researcher

你提到学习管理系统的界面很复杂。能否详细说明这一点？它具体如何影响你的使用体验？

You mentioned the learning management system's interface being complex. Could you elaborate on that? How does it specifically affect your usage?

04:39 Respondent 11

确实。有时候光是寻找所需资料就要耗费大量时间，因为界面设计不够直观。各种主栏目和子栏目层层嵌套，很容易让人迷失方向。这种复杂性让我感到沮丧和烦躁，以至于除非迫不得已，我常常选择回避使用这个系统。

Sure. Sometimes I spend a lot of time just trying to find the materials I need because the interface isn't intuitive. There are so many sections and subsections that it's easy to get lost. This complexity makes me feel frustrated and annoyed, and I often end up avoiding it unless I really have to use it.

05:12 Researcher

这是很有帮助的反馈。那么雨课堂的互动环节呢？您提到答题时遇到困难。这种情况发生的频率如何？当时让您产生了怎样的感受？

That's helpful feedback. What about Rain Classroom's interactive sessions? You mentioned difficulty with the questions. How often does this happen, and how does it make you feel in the moment?

05:42 Respondent 11

这种情况经常发生，尤其是当老师布置特别具有挑战性的任务时。在那些时刻，我会感到一阵恐慌和自我怀疑。我担心自己无法正确回答问题，害怕在同学面前显得愚蠢。

It happens quite often, especially when the teacher assigns particularly challenging tasks. During those moments, I feel a sense of panic and self-doubt. I worry that I won't be able to answer correctly and that I might look silly in front of my classmates.

06:11 Researcher

这听起来是段充满压力的经历。在治疗过程中，你通常如何应对这些情绪？

It sounds like a stressful experience. How do you usually cope with these feelings during the sessions?

06:37 Respondent 11

说实话，有时候我会直接跳过那些难题，专注于我觉得简单的问题。还有些时候，我可能会快速浏览资料寻找线索，但这并不总是有效。我常常最终觉得自己不够聪明。

Honestly, sometimes I just skip answering those difficult questions and focus on the ones I find easier. Other times, I might quickly scan through the materials to find clues, but it's not always effective. I often end up feeling like I'm not smart enough.

07:20 Researcher

那一定很不容易。遇到这些困难时，你有没有考虑过向老师或同学寻求帮助呢？

That must be really tough. Have you ever considered seeking help from teachers or classmates when you encounter these difficulties?

07:52 Respondent 11

我曾考虑过寻求帮助，但通常因为难为情而作罢。我不愿在他人面前显得无能，所以常常选择独自摸索解决问题，即便这需要耗费更多时间。

I have thought about it, but I'm usually too embarrassed to ask for help. I don't want to appear incompetent in front of others. I often try to figure things out on my own, even if it takes me longer.

08:16 Researcher

我理解。克服这种尴尬并在需要时寻求支持很重要。说到老师，你认为他们在帮助学生应对这些挑战中扮演什么角色？

I understand. It's important to overcome that embarrassment and seek support when needed. Speaking of teachers, what role do you think they play in helping students overcome these challenges?

08:45 Respondent 11

教师在教育过程中扮演着至关重要的角色。他们通过鼓励学生提问和提供及时反馈，能够营造更具支持性的学习环境。若教师能以更清晰、更具吸引力的方式讲解知识概念，必将有效缓解学生的焦虑情绪并提升其学习成效。

Teachers play a crucial role. They can create a more supportive learning environment by encouraging students to ask questions and providing timely feedback. If teachers can explain concepts in a clearer and more engaging way, it would definitely help reduce students' anxiety and improve their learning outcomes.

09:05 Researcher

当然。这些教育技术工具的设计如何？怎样才能改进它们以更好地支持学生的学习需求？

Absolutely. What about the design of these educational technology tools? How can they be improved to better support students' learning needs?

09:30 Respondent 11

从学生的角度来看，简洁直观是关键。界面设计应该以用户为中心，便于导航和查找所需内容。此外，为题目设置难度分级或为互动任务提供提示等功能会非常实用。这些设计能让学习过程更轻松愉快，减少压力感和减少不安。

Well, from a student's perspective, simplicity and intuitiveness are key. The interfaces should be designed with users in mind, making it easy to navigate and find what we need. Additionally, features like difficulty levels for questions or hints for interactive tasks would be really helpful. It would make the learning process less overwhelming, more enjoyable and reduce worried.

10:30 Researcher

这些都是很棒的建议。通过这些工具提供的内容呢？你是否曾因信息量过大或传递速度过快而感到不堪重负？

Those are great suggestions. What about the content provided through these tools? Do you ever feel overwhelmed by the amount of information or the pace at which it's delivered?

10:56 Respondent 11

确实如此。有时候信息量太大难以处理，感觉就像被淹没其中。真希望能有方法把内容分解成更小、更易管理的部分。这样就不会感到如此不堪重负，也能按照自己的节奏吸收信息了。

Definitely. Sometimes there's just too much information to process, and it feels like I'm drowning in it. I wish there were ways to break down the content into smaller, more manageable chunks. That way, it wouldn't feel so overwhelming, and I could absorb the information at my own pace.

11:16 Researcher

这很有道理。你认为教育工作者如何才能更好地平衡信息量和授课节奏？

That makes sense. How do you think educators can better balance the amount of information and the pace of delivery?

11:50 Respondent 11

教育工作者可以更精心地规划教学内容，为每次课程设定切实可行的目标。他们还应提供清晰的课程目标与教学路线图，让学生明确学习预期并做好相应准备。安排定期休息时段并提供复习巩固知识的机会，也将有助于学习效果提升。

Educators could plan the content more carefully, setting realistic goals for each session. They could also provide clear objectives and a roadmap for the course, so students know what to expect and can prepare accordingly. Regular breaks and opportunities for students to review and consolidate their learning would also help.

12:20 Researcher

感谢您的见解。这有助于我们理解如何设计更具情感支持效果的学习环境。Thank you for your insights. It's helpful for us to understand how to design more effective and emotionally supportive learning environments.

13:00 Respondent 11

您客气了

You're welcome. I'm glad I could help.

13:20 Researcher

顺便问一下，你认为这些教育技术工具的社交属性会影响你的学习体验吗？例如通过这些平台与同学和老师之间的互动。

By the way, do you think the social aspect of these educational technology tools affects your learning experience? For instance, interactions with classmates and teachers through these platforms.

14:04 Respondent 11

确实，社交层面相当重要。当我看到同学们积极参与并表现出色时，这既能产生激励作用，也可能增加压力。另一方面，当感受到老师和同学的支持与鼓励时，我会更愿意投入并坚持学习。

Yes, the social aspect is quite important. When I see classmates actively participating and doing well, it can be motivating, but it can also add to the pressure. On the other hand, when I feel supported and encouraged by both teachers and classmates, it makes me more willing to engage and persist in my learning.

14:42 Researcher

如何通过这些社交互动来营造更积极的学习环境？How can these social interactions be enhanced to create a more positive learning environment?

15:20 Respondent 11

或许可以通过培养社区意识和协作精神来实现。教师可以组织小组活动和讨论，鼓励同伴互助与知识共享。同时，创建让学生能自在表达想法、毫无顾虑地提问的安全空间也将大有裨益。

Maybe by fostering a sense of community and collaboration. Teachers could organize group activities and discussions that encourage peer support and knowledge sharing. Also, creating safe spaces where students feel comfortable expressing their thoughts and asking questions without fear of judgment would be beneficial.

15:50 Researcher

这一点很有价值。那么反馈在这些工具中的作用如何？对你而言，收到关于作业和课堂参与的反馈有多重要？

That's a valuable point. What about the role of feedback in these tools? How important is it for you to receive feedback on your assignments and participation?

16:27 Respondent 11

反馈极其重要。它能帮助我了解自己的优势和改进空间。当我收到及时且具有建设性的反馈时，这会激励我做得更好并增强我的信心。反之，缺乏反馈会让我感到不确定和疏离。

Feedback is extremely important. It helps me understand my strengths and areas for improvement. When I receive timely and constructive feedback, it motivates me to do better and boosts my confidence. Lack of feedback, on the other hand, can make me feel uncertain and disengaged.

16:51 Researcher

如何改进这些教育技术工具中的反馈流程？

How can the feedback process be improved in these educational technology tools?

17:23 Respondent 11

反馈应当及时、具体且个性化。与其给出泛泛的评价，不如详细说明我做得好之处以及需要改进的地方，这样会更有帮助。此外，采用多种反馈形式，比如音频或视频评论，可能会让反馈更具吸引力且更有效。

Feedback should be timely, specific, and personalized. Instead of just a generic comment, it would be helpful to have detailed insights into what I did well and where I need to improve. Also, incorporating multiple modes of feedback, like audio or video comments, could make it more engaging and effective.

17:53 Researcher

感谢您提出的详细建议。显然您对此进行了深入思考，您的反馈对我们的研究极具帮助。

Thank you for your detailed suggestions. It's clear that you've given this a lot of thought, and your feedback is very helpful for our research.

18:25 Respondent 11

我很乐意提供帮助。希望我的经验和建议能够为改善这些教育技术工具做出贡献，让更多人受益。

I'm happy to help. I hope my experiences and suggestions can contribute to improving these educational technology tools for everyone.

18:40 Researcher

你对我帮助很大

We truly appreciate your time and openness. Your insights are invaluable to us.

18:50 Respondent 11

谢谢你的帮助

Thank you for conducting this interview. It's been a good opportunity for me to reflect on my learning experiences.

19:10 Researcher

希望以后还能合作

It was a pleasure speaking with you. We might follow up with you for further questions if needed.

19:30 Respondent 11

感谢

Of course, feel free to contact me anytime.

19:40 Researcher

生活愉快

Have a great day!

19:45 Respondent 11

再见

You too. Goodbye.

19:50 Researcher

再见

Goodbye.

Interview 12

00:00 Researcher

你能听到我声音吧？今天我们主要聊聊你使用信息化教学工具的一些感受。

您好，感谢您接受本次访谈。我们想了解您在使用教育技术工具时的感受，特别是那些可能让您感到不适或产生放弃倾向的情况。能否先简要介绍一下您通常使用这些工具的频次及方式？

Hello, thank you for accepting this interview. We would like to understand your feelings when using educational technology tools, especially those situations that may have made you feel uncomfortable or inclined to give up. Could you first briefly introduce how frequently and in what ways you typically use these tools? Can you hear me clearly? Today we'll mainly talk about your experiences using technology-assisted learning tools.

00:55 Respondent 12

能听到，很清楚好的，平常的话，我主要用雨课堂，偶尔也会用职教云和慕课，频率大概是每周至少四五次吧。

Yes, loud and clear. Mainly Rain Classroom, occasionally Cloud Classroom and MOOCs. I use them around four to five times per week.

01:34 Researcher

嗯，看来你使用得相当频繁。那么你有没有经历过在使用这些工具时产生中断或中辍的现象？
Well，It seems you use it quite frequently. En, Have you experienced interruptions or intermittent dropout when using these tools?

01:53 Respondent 12

呃，让我想想。有过。有时候会突然觉得不想用了，尤其是在遇到一些状况的时候。

E, e, Let me think. Yes, sometimes I suddenly feel reluctant to use them, especially when encountering certain situations.

02:36 Researcher

你刚刚提到一些状况，可以具体说一下是什么情况吗？
You mentioned certain situations—could you describe those in detail?

03:00 Respondent 12

比如说平台有时很卡顿，我准备好的答案提交不上去，会特别焦虑。而且有时候老师布置任务特别多，看起来就头疼让我紧张，就索性停一阵子不用了。
For example, sometimes the platform lags, and I feel very anxious when I can't submit my prepared answers. Also, when teachers assign a lot of tasks, it feels overwhelming and let me feel worried, so I temporarily stop using it.

03:38 Researcher

那你刚才说的焦虑情绪，会经常出现吗？会如何影响你的使用？
You mentioned anxiety—does it occur frequently? How does it impact your use?

04:00 Respondent 12

挺频繁的吧。每次一焦虑，我的注意力就没法集中，有时候干脆关掉软件，做点别的事情再回来。
Quite often. Whenever I'm anxious, I can't concentrate. Sometimes I just close the app, do something else, and then return.

04:45 Researcher

除了焦虑之外，你有没有经历过其他负面情绪，比如抑郁或者不满意？
Besides anxiety, have you experienced other negative emotions like depression or dissatisfaction?

05:26 Respondent 12

抑郁也会有一点。比如明明自己很努力准备了答案，最后发现别人随便答答的分数都比我高，就感觉特别沮丧，然后那阵子就很不想再用了。
A bit of depression too. For example, if I put a lot of effort into an answer and find others casually answering but still getting higher scores, I feel very frustrated and unwilling to continue using the platform for a while.

05:44 Researcher

这种情况会持续多久？
How long does this usually last?

06:10 Respondent 12

短的一两天，长的可能要一周。
A couple of days for shorter periods, up to a week for longer ones.

06:55 Researcher

关于不满意的情绪呢？你有没有觉得哪方面特别不满意？
Regarding dissatisfaction, are there specific aspects you’re particularly unhappy about?

07:11 Respondent 12

有时候觉得互动功能设计得不是特别好，比如弹幕功能很乱，我想表达观点但又害怕被别人看到自己的错误，就干脆不用那个功能了。
Sometimes I find the interaction features poorly designed, such as chaotic live comment functions. I want to express my views but fear others seeing my mistakes, so I avoid using that feature altogether.

07:32 Researcher

这些情绪出现时，你一般会采取什么样的应对措施呢？
When these emotions arise, how do you typically cope?

07:57 Respondent 12

一般是暂时停一下，比如离开软件，做点别的事情，或者干脆过段时间再用。
Usually by temporarily disengaging, leaving the software, doing something else, or returning after a break.

08:36 Researcher

你觉得有什么办法可以帮你更好地应对这些情绪，更有效地继续使用这些工具吗？
Do you think there’s anything that could help you manage these emotions better and continue using the tools more effectively?

09:16 Respondent 12

可能如果老师能够更多地关注每个人的具体情况，比如延长一下提交答案的时间，或者多鼓励一下成绩不好的同学，这样我心里可能会轻松一些。
Maybe if teachers could pay more attention to individual situations—like extending deadlines or encouraging students with poorer performances—I might feel less stressed.

09:48 Researcher

你有没有一次经历，是你几乎要放弃使用平台，但最后却坚持下来的？当时是什么让你坚持下来了？
Can you recall a time when you nearly dropped out but chose to continue? What encouraged you?

10:13 Respondent 12

有一次是考试前，我特别焦虑，想放弃复习平台上的材料，但想到如果不坚持可能考试就挂了，还是强迫自己坚持下去了。
There was one time before an exam when I felt extremely anxious and wanted to abandon reviewing platform materials, but realizing that I might fail if I didn't persist, I forced myself to keep going.

10:48 Researcher

回过头看，你认为平台设计上还有哪些可以优化的地方吗？
In hindsight, what aspects of platform design do you think could be improved?

11:13 Respondent 12

可能界面再简洁一点，提交任务的时候再明确一些，特别是出问题的时候，有明确的提示和指导，这样会减少我的焦虑吧。
Perhaps a simpler interface, clearer task submission guidelines, and explicit instructions when encountering issues—this would probably reduce my anxiety.

11:48 Researcher

好的，非常感谢你的分享，这些对我们的研究非常有帮助！
Great, thank you so much for your insights; they're very helpful for our research!

12:13 Respondent 12

不客气。
You're welcome.

12:40 Researcher

感谢您的见解。这有助于我们理解如何设计更具情感支持性且更有效的学习环境。Thank you for your insights. It's helpful for us to understand how to design more effective and emotionally supportive learning environments.

12:55 Respondent 12

没关系

HA，You're welcome. I'm glad I could help.

Interview 13

00:00 Researcher

您好，感谢接受本次访谈。我们想了解您在使用教育科技工具时的感受，特别是那些可能让您感到不适或产生放弃倾向的情况。能否先简要介绍一下您通常使用这些工具的频次及方式？

Hello, thank you for accepting this interview. We would like to understand your feelings when using educational technology tools, especially those situations that may have made you feel uncomfortable or inclined to give up. Could you first briefly introduce how frequently and in what ways you typically use these tools?

00:32 Respondent 13

好的，我每周通常使用雨课堂上课，主要是提交作业和查看课程资料。有时我也会用学习管理系统查看课程公告和作业要求。

Well, I will check the notice and homework assigned by the teacher. And sometimes the teacher will ask us to do a preview with some materials.

00:40 Researcher

看起来你使用得相当频繁。你是否曾遇到过任何不愉快的状况，让你想要暂时中断或暂停使用？

Have you ever experienced any unpleasant situations that made you want to temporarily discontinue or pause your usage?

01:03 Respondent 13

让我想想。确实，有时学习管理系统里的通知太多，会让我感到不堪重负，根本不想查看。还有雨课堂的互动环节，如果问题太难，我会感到焦虑，有时甚至直接放弃作答。

En. Let me recall. I feel that sometimes I feel uncomfortable. Especially when I meet some difficult and do not know how to do. So I have to take a break. However, my peers are keep on with their study. It will cause me difficult and anxiety. So I have to drop for a little while.

01:39 Researcher

因此，这些负面情绪影响了您使用这些工具的意愿。您是完全停止使用它们了，还是仅仅避开某些功能？

So, these negative emotions have affected your willingness to use these tools. Have you ever completely stopped using them, or just intermittent dropout certain features?

02:08 Respondent 13

我并没有完全停止使用它们，但确实会避开某些功能。例如，我很少参与讨论论坛，因为害怕说错话或表达不够清晰。

Totally? No. I will not cause I have to take some discussion for my daily score and I wish to pass the exam finally. But I will try to focus on my best part, haha.

02:30 Researcher

明白了。那么，你认为这些负面情绪如何影响你的学习体验？对于如何更好地利用这些教育技术工具，你有什么建议吗？

I see. So, how do you think these negative emotions impact your learning experience? Do you have any suggestions on how to better utilize these educational technology tools?

03:10 Respondent 13

负面情绪确实会影响我的学习动力。至于如何改进这些工具的使用，我认为教师可以提供更多指导和鼓励。此外，如果平台能提供更人性化的功能，比如分步教程或个性化推荐，可能有助于缓解焦虑并提升整体学习体验。

I think that negative emotions will correlated with my learning motivation. And that is based on the fact that I want to improve my learning through the technology tools, however, I find these interfaces are not so friendly for me. So these may cause me anxiety to dropout a little bit.

03:33 Researcher

你提到学习管理系统的界面很复杂。能否详细说明这一点？它具体如何影响你的使用体验？

You mentioned the learning management system's interface being complex. Could you elaborate on that? How does it specifically affect your usage?

04:03 Respondent 13

确实。有时候我花很多时间只是为了找到需要的资料，因为界面设计不够直观。各种主栏目和子栏目层层嵌套，很容易让人迷失方向。这种复杂性让我感到沮丧和烦躁，以至于除非迫不得已，我经常选择回避使用这个系统。

Well. I have discus this issue with my classmates. We all think that the interface just as I have stated that it is too complex. For example: the dashboard here shows that the main tasks, comments, resources and so on. However, when I want to check my teachers’ feedback, it will always lead me to the submenu. Then I follow the instruction to click. The task move on to next one. So I missed the class.

04:40 Researcher

这是很有帮助的反馈。那么雨课堂的互动环节呢？你提到答题存在困难。这种情况发生的频率如何？当时让你产生了怎样的感受？

Thanks for sharing. So what do you think of Rain Classroom’s interactive part? Does this part benefit you?

05:01 Respondent 13

这种情况经常发生，尤其是当老师布置特别具有挑战性的任务时。在那些时刻，我会感到一阵恐慌和自我怀疑。我担心自己无法正确回答问题，害怕在同学面前出丑。

Well, for that part. I have tried, sometimes, I will ask them for help. However, their responding is too vague for me to understand and I feel worried. Then I go back to them, they are under other issues. So I will rely on myself. Though it will take more time.

05:37 Researcher

这听起来是段充满压力的经历。在咨询过程中，你通常如何应对这些情绪？

How do you usually cope with these feelings during the sessions?

06:05 Respondent 13

坦白说，有时我会直接跳过那些难题，专注于我觉得简单的问题。还有些时候，我可能会快速浏览材料寻找线索，但这并不总是有效。我常常最终觉得自己不够聪明。

Frankly, I get used to them. So these feelings won’t hurt me anymore. So when I came across a difficulty, I shall say to my self that” look, it happens again. No big deal.” so I will stay focus on how to handle the problem. Although, these negative feeling did hinder my process.

06:33 Researcher

挺难的。你想过寻求老师和同学的帮助吗？

That must be really tough. Have you ever considered seeking help from teachers or classmates when you encounter these difficulties?

07:00 Respondent 13

尽管我曾考虑寻求帮助，但通常还是会选择向同学提问。面对他们时，我不会感到焦虑，他们也不会因我犯错而评判我。这让我感到安心。但有时候，他们好像也没有那么多精力吧，我个人认为还是要靠自己。

Although I considered asking for help, I usually choose to ask questions of my classmates. Facing them, I do not feel anxiety, nor do they judge me on the issues I have done wrong. This makes me feel secure. However，sometimes, they shall not devote theirselves to others, so I choose to rely on my own.

07:30 Researcher

I understand. Speaking of teachers, what role do you think they play in helping students overcome these challenges?

08:00 Respondent 13

我相信老师能给予我们很大帮助。比如，若老师今天因某项任务表扬我，面对困难时我就会充满干劲。但身处大班教学中，老师持续处理多项事务，在有限时间内无法关注到每个人，只能聚焦前10名学生。因此我觉得，如果老师能给予我们更慷慨的鼓励，情况将会大不相同。

I believe that teacher could give us a lot of help. For example, if a teacher prize me of a task today, I will feel full of energy when facing the difficulties. However, I am in a big scale of class. The teacher keep on dealing with multi-tasks, with limited time, she could not put focus on every one, just on the top 10. So I feel that if teacher could offer more generous encouragement on us things will be different.

08:30 Researcher

当然。这些教育技术工具的设计如何？怎样才能改进它们以更好地支持学生的学习需求？

How do you propose the improvement of these educational technology tools in assistant your learning?

09:00 Respondent 13

正如我在之前的采访中提到的那样，这个仪表盘对学生来说太难掌握了。如果界面能更新更便捷的提示或辅助功能来支持我的学习，我会更关注它。

Well , just like I have mentioned in the previous interview. The dashboard is to difficult to master as for a student. So if the interface could update with more convenient tips or assisted functions to support my study. I will pay more attention on it.

09:30 Researcher

你说得很有用。让我们考虑一下另外一个问题。你觉得被压抑，因为这个系统提供得内容或者节奏？

Your answers are very help. And let us talk about the content provided by the tool. Do you ever feel overwhelmed by the amount of information or the pace at which it's delivered?

10:00 Respondent 13

Well. Sometimes, it really affect me. I remembered once I wanted to know the topic of *BUSINIESS ETHICS* . when I opened the platform, so many information just show in front of me. So I could not decide which one shall start first. Furthermore, this topic is hard for me. So I have to dropout waiting for teachers’ guidance.

10:30 Researcher

That makes sense. How do you think educators can better balance the amount of information and the pace of delivery?

11:00 Respondent 13

I think that if teachers could pay more attention on everyone , not just the top 10. Things will be better. Cause they know much more in advance than we do. So we have to catch up with them and try to keep ourselves.

11:30 Researcher

Thank you for your insights. It's helpful for us to understand how to design more effective and emotionally supportive learning environments.

11:45 Respondent 13

You're welcome. My pleasure.

11:50 Researcher

By the way, do you think the social aspect of these educational technology tools affects your learning experience? For instance, interactions with classmates and teachers through these platforms.

12:20 Respondent 13

En social aspect is part of the classroom culture, cause we have peers and classmates. They will affect me when I make some decisions. So I hope teacher could offer student a private space for our discussion. Then we could do our report in front of the whole class.

12:50 Researcher

How can these social interactions be enhanced to create a more positive learning environment?

13:20 Respondent 13

Let me think. En. In the purpose of improving our collaboration and communication, it may be a good method. Cause when I want to talk to my friend who is not sit around me, I could not choose yell in class to disobey the class principles, so I could chat with him online instead for better communication.

13:50 Researcher

That's a valuable point. What about the role of feedback in these tools? How important is it for you to receive feedback on your assignments and participation?

14:20 Respondent 13

I think feedback from teachers are important and essential for my study. It will lead me to a certain academic improvement and self assessment. Students commonly meet a situation that they are not quiet sure about their academic performance is beneficial or dis. Further we all want to improve our selves by knowing the right direction to enhance ourselves to a better lever with more self-confidence. So, I hope teacher could help me on that.

14:50 Researcher

How can the feedback process be improved in these educational technology tools?

15:20 Respondent 13

Well, I think teacher could assist us in two ways. First is to give mark on teaching activity performance. Teachers could just offer us a grade, however, it could be even better if higher grade as a encouragement. Secondly, the teacher could give us some suggestions on how to improve ourselves by private chatting message.

15:50 Researcher

Thank you for your detailed suggestions. It's clear that you've given this a lot of thought, and your feedback is very helpful for our research.

16:20 Respondent 13

I'm happy to help.

16:40 Researcher

We truly appreciate your time and openness. Your insights are invaluable to us.

16:50 Respondent 13

Thank you for conducting this interview. It's been a good opportunity for me to reflect on my learning experiences.

17:10 Researcher

It was a pleasure speaking with you. We might follow up with you for further questions if needed.

17:30 Respondent 13

Anytime you mention.

17:40 Researcher

Have a great day!

17:45 Respondent 13

You too. Goodbye.

17:50 Researcher

Goodbye.

Interview 14

00:00 Researcher

可以听到我讲话吧？我们今天访谈的主要内容是想聊聊你使用信息化学习工具时的情绪体验。
Can you hear me clearly? Today, we'll mainly discuss your emotional experiences using digital learning tools.

00:20 Respondent 14

听得到，没问题！
Yes, no problem!

00:40 Researcher

你平时都会使用哪些信息化工具学习？大概使用频率是怎样的？

Which digital tools do you usually use for learning, and how frequently?

01:00 Respondent 14

主要就是用雨课堂啊，有时也用职教云、超星这些。一般的话每周两三次，上课老师都会要求用。
Mainly Rain Classroom, sometimes Cloud Classroom and ChaoXing. Usually about two or three times a week, required by teachers during classes.

01:30 Researcher

那你有没有经历过在使用这些工具时的中断或间歇性放弃呢？
Have you ever experienced interruptions or intermittent dropouts when using these tools?

02:00 Respondent 14

有啊，特别是有时候用雨课堂，感觉不太想用了。
Yes, especially sometimes when using Rain Classroom, I just don’t feel like using it.

02:30 Researcher

能具体说一下导致你不想用的原因吗？
Can you describe specifically what makes you reluctant to use it?

03:00 Respondent 14

主要是任务太多了，有时候看着就烦，老师一节课放好多任务，还老要抢答，看得我特别焦虑。
Mainly because there are too many tasks. Sometimes it's annoying just to look at them. Teachers assign many tasks in one class, and we have to quickly respond, which makes me very anxious.

03:30 Researcher

这种焦虑经常发生吗？
Does this anxiety occur often?

04:00 Respondent 14

差不多吧，每次任务多就会出现，而且越着急越不会答题。
Quite often. It happens whenever there are many tasks, and the more anxious I get, the harder it becomes to answer.

04:30 Researcher

除了焦虑之外，还有哪些情绪会影响你使用这些工具呢？
Besides anxiety, what other emotions affect your use of these tools?

05:00 Respondent 14

有时候是不满意吧。感觉雨课堂软件特别卡顿，老师发的东西有时候加载特别慢，提交答案也老出问题。每次碰到这种情况，感觉很烦躁，就干脆不弄了。
Sometimes dissatisfaction. The Rain Classroom app is laggy. Materials from teachers load slowly, and submission problems often occur. I feel frustrated every time this happens, so I just stop using it.

05:30 Researcher

那这种不满意对你学习的影响大吗？
Does this dissatisfaction significantly impact your learning?

06:00 Respondent 14

挺大的啊，每次卡顿之后我就心烦意乱，不想继续用了，然后整节课效率都特别低。
Quite significantly. After each lag, I get agitated and don't want to continue. My efficiency for the entire lesson drops dramatically.

06:30 Researcher

你刚才提到还会感受到压力，具体是什么样的情况呢？
You also mentioned feeling pressure; could you elaborate on that?

07:00 Respondent 14

嗯，主要是同学吧。我本来学习就一般，然后我们班有几个同学特别活跃，每次抢答特别快，老师又特别表扬他们。我自己答不上来，就感觉压力特别大，有时候干脆就放弃了。每人注意我是否消失了。
Mainly from peers. I'm average academically, and some classmates are very active, always quick to respond, receiving praise from teachers. When I can't answer, I feel enormous pressure and sometimes just give up. No one would notice if I disappeared.

07:30 Researcher

这些情绪让你放弃的时间通常会持续多久呢？
How long do these emotions typically cause you to disengage?

08:08 Respondent 14

短的可能一两天，长的可能会持续一周甚至更久吧。
A day or two at minimum, but sometimes a week or even longer.

08:30 Researcher

你通常是如何应对这些负面情绪的？
How do you usually cope with these negative emotions?

09:08 Respondent 14

一般会跟朋友出去玩一玩，打游戏放松一下，过一阵再回来用这些软件。
Usually, I’ll hang out with friends, play games to relax, and return to the software after a while..

09:32 Researcher

那老师或者学校有没有提供什么帮助，来减少这些负面情绪的影响呢？
Have your teachers or school provided help to reduce the impact of these emotions?

10:00 Respondent 14

目前倒是没有特别明显的帮助吧，感觉老师还是按照自己的节奏来，也没注意到我们这些学习一般的同学有时候挺困难的。
Not much obvious help at the moment. Teachers mostly follow their own pace and don’t seem aware of our struggles as average students.

10:22 Researcher

你希望老师或学校能怎样帮你们缓解这些情绪呢？
How do you wish teachers or the school could help alleviate these emotions?

11:00 Respondent 14

我觉得老师应该循序渐进一点，别一下子布置太多任务，难度也稍微降低一点。比如一次上课别超过两三个任务，问题也别太复杂，我们就不会那么焦虑了。
I think teachers should assign tasks gradually, not too many at once, and reduce their difficulty slightly. For example, no more than two or three tasks per class, and avoid overly complex questions. That way, we wouldn't feel as anxious.

11:39 Researcher

回想一下，有没有哪次你差点因为情绪问题放弃了使用软件，但最终还是坚持下来了？
Can you recall a time when emotions almost led you to abandon the software, but you eventually persisted?

11:45 Respondent 14

有啊，有一次考试前我特别焦虑，不想再用雨课堂复习了，但后来跟朋友聊了聊，他们也一样焦虑，我就想反正大家都这样，咬咬牙还是坚持下去了。
Yes, before an exam, I was extremely anxious and nearly quit revising via Rain Classroom. After chatting with friends who felt similarly anxious, I thought since everyone felt this way, I might as well grit my teeth and persist.

11:50 Researcher

那么，最后一个问题，你觉得平台本身在设计或功能上，还能有什么改进来帮助你更好地坚持学习？
Finally, in terms of platform design or features, what improvements could help you maintain your learning better?

12:20 Respondent 14

最好别总卡顿，任务和互动可以更简单直观一点，界面设计得再清楚些，这样使用起来压力也会小很多吧。
Avoid lagging, make tasks and interactions simpler and clearer, and improve interface design. This would significantly reduce pressure.

12:50 Researcher

好，非常感谢你的耐心回答，对我们研究很有帮助！
Great, thanks very much for your patient answers. They are very helpful for our research!

13:20 Respondent 14

不客气，挺开心能帮到你们。
You're welcome, glad I could help!

Interview 15

00:00
Researcher:
您好，感谢参与本次访谈。我们想了解您使用信息化教学工具的经历，以及情绪对您使用这些工具的影响。回答没有对错，如实分享即可，信息会严格保密。

Hello, thank you for participating in this interview. We would like to understand your experience in using information-based teaching tools and the impact of emotions on your use of these tools. There are no right or wrong answers—just share your honest experience. All information will be kept strictly confidential.

00:20
Respondent 15:
好的，让我想想。

Okay, let me recall.

00:30
Researcher:
您使用过雨课堂和超星吗？

Have you used Rain Classroom and Chaoxing?

00:40
Respondent 15:
是的，我经常使用雨课堂提交作业和查看课程资料，也会用超星看课程视频。

Yes, I often use Rain Classroom to submit assignments and check course materials, and I also watch course videos on Chaoxing.

01:00
Researcher:
您在使用这些工具时，有没有遇到过让您感到不舒服或者想要放弃的情况？

Have you encountered any situations while using these tools that made you feel uncomfortable or inclined to give up?

01:15
Respondent 15:
有，有时候雨课堂上的作业特别多，而且有些题目很难，我做起来很吃力。看到其他同学已经完成了作业，我就会感到焦虑。

Yes, sometimes there are a lot of assignments on Rain Classroom, and some of the questions are very difficult. Seeing other students finish their homework makes me anxious.

02:00
Researcher:
这种焦虑情绪有没有让您想过要放弃使用雨课堂？

Did this anxiety make you consider giving up on using Rain Classroom?

02:15
Respondent 15:
没有想过完全放弃，但那段时间我确实不太愿意打开雨课堂，看到未完成的作业提醒就心烦。

I never really thought about giving up completely, but during that time, I was reluctant to open Rain Classroom and felt annoyed by the reminders of unfinished homework.

03:00
Researcher:
除了焦虑，您还遇到过其他让您不舒服的情绪吗？比如倦怠、嫉妒或者沮丧？

Besides anxiety, have you experienced any other uncomfortable emotions, such as burnout, jealousy, or frustration?

03:30
Respondent 15:
倦怠肯定是有过的。比如超星上的课程资料特别多，课件、视频、拓展阅读堆在一起，看一会儿就觉得累，不想再看了。

I definitely felt burnout. For example, there were so many course materials on Chaoxing—courseware, videos, and extended readings all together—that after looking at them for a while, I felt tired and didn't want to continue. I got so frustrated that I gave up for a while.

04:15
Researcher:
那这种倦怠情绪有没有影响到您完成作业的积极性？

Did this burnout affect your enthusiasm for completing homework?

04:30
Respondent 15:
有一点吧。有时候我就不愿意按时提交作业了，想着拖一拖说不定就不用做了。

A little bit. Sometimes I just didn't want to submit assignments on time, thinking that if I procrastinated, maybe I wouldn't have to do them.

05:00
Researcher:
我理解您的感受。那您觉得有什么方法可以帮助您克服这些负面情绪，更好地使用这些教育技术工具吗？

I understand how you feel. Do you think there are any methods that could help you overcome these negative emotions and better utilize these educational technology tools?

05:30
Respondent 15:
我觉得如果雨课堂能在作业提醒方面做得更好，比如提醒我还有多少时间完成作业，可能就不会那么焦虑了。

I think if Rain Classroom could improve its homework reminder function, such as reminding me how much time I have left to complete assignments, it might reduce my anxiety.

06:00
Researcher:
您提到超星上的课程资料很多，这是否影响了您的学习效率？

You mentioned that there are a lot of course materials on Chaoxing. Did this affect your learning efficiency?

06:30
Respondent 15:
是的，确实有影响。有时候为了赶时间，我只能快速浏览，无法深入理解内容。

Yes, it did. Sometimes, in order to save time, I could only skim through the materials and couldn't understand them deeply.

07:00
Researcher:
这是否让您对使用超星产生了一些抵触情绪？

Did this make you somewhat resistant to using Chaoxing?

07:30
Respondent 15:
确实如此。有时候我会选择性地忽略一些资料，只关注我认为重要的部分。

Exactly. Sometimes I would selectively ignore some materials and only focus on what I considered important.

08:00
Researcher:
您觉得信息化教学工具的设计是否可以做一些改进，以减少用户的负面情绪？

Do you think the design of these digital education tools could be improved to reduce users' negative emotions?

08:30
Respondent 15:
我觉得可以。比如，超星可以对资料进行分类，标上重点，这样看起来就不会那么乱。雨课堂的互动答题也可以提供一些提示，降低用户的焦虑感。

I think so. For example, Chaoxing could categorize the materials and mark the key points, so it wouldn't look so messy. Rain Classroom's interactive Q&A could also provide some hints to ease users' anxiety.

09:30
Researcher:
您还提到过嫉妒情绪，能详细说说吗？

You mentioned feeling jealous. Could you elaborate on that?

10:00
Respondent 15:
有时候看到其他同学在课堂互动环节回答问题特别好，老师还表扬他们，我就觉得自己怎么也做不到那么好，心里有点不舒服。

Sometimes when I see other classmates answering questions exceptionally well during class interactions and receiving praise from the teacher, I feel like I can never perform that well, which makes me a bit uncomfortable.

11:00
Researcher:
这种嫉妒情绪有没有影响到您参与课堂互动的积极性？

Has this feeling of jealousy affected your enthusiasm for participating in classroom interactions?

11:30
Respondent 15:
有一点吧。有时候我就不愿意主动回答问题了，怕自己答不好被别人笑话。

A little bit. Sometimes I just don't want to actively answer questions, afraid that I might not answer well and be laughed at by others.

12:00
Researcher:
您觉得老师在课堂上应该如何调整教学方法，以更好地鼓励学生参与互动？

What do you think teachers could do in class to better encourage students to participate in interactions?

12:30
Respondent 15:
我觉得老师可以在课堂上多鼓励我们，不要只表扬那些表现好的同学。这样可以让更多学生感受到老师的关注，增强他们的自信心。

I think teachers could encourage us more in class and not just praise the students who perform well. This way, more students can feel the teacher's attention and enhance their self-confidence.

13:30
Researcher:
您还提到过沮丧情绪，能详细说说吗？

You also mentioned feeling frustrated. Could you elaborate on that?

14:00
Respondent 15:
有时候提交的作业分数不高，就会感到沮丧，不想再打开软件看反馈。

Sometimes when the scores for submitted assignments aren't high, I feel frustrated and don't want to open the software to check the feedback.

15:00
Researcher:
这种沮丧情绪有没有让您想过要放弃使用这些工具？

Did this frustration make you consider giving up on using these tools?

15:30
Respondent 15:
没有想过完全放弃，但我可能会拖延，比如作业快截止了才急急忙忙去做。

I never really thought about giving up completely, but I might procrastinate, like rushing to do the homework when the deadline is approaching.

16:30
Researcher:
您觉得这些信息化教育工具在设计上有什么可以改进的地方，能减少这种中途停下来的情况呢？

What aspects of the design of these digital education tools do you think could be improved to reduce such instances of mid-process interruptions?

17:00
Respondent 15:
我希望超星能把资料分分类，标上重点，看起来就没那么乱了。雨课堂的互动答题能不能给点提示，别让我太焦虑。

I hope Chaoxing could categorize the materials and mark the key points, so it wouldn't look so messy. For Rain Classroom's interactive Q&A, could you give some hints to ease my anxiety?

18:00
Researcher:
您还提到过失望情绪，能详细说说吗？

You mentioned feeling disappointed. Could you elaborate on that?

18:30
Respondent 15:
比如老师发布了某个活动，看到有很多人对某个同学的答案点赞和评论，而自己的答案下面却寥寥无几，就会感到失望。

For example, when the teacher posts an activity and I see many people liking and commenting on a certain classmate's answer, while my own answer receives very few comments, I feel disappointed.

19:30
Researcher:
这种失望情绪有没有让您不想再使用这些工具？

Did this disappointment make you not want to use these tools anymore?

20:00
Respondent 15:
不会完全不想用，但可能会减少使用频率，或者只使用某些功能。

I wouldn't completely stop using them, but I might reduce the frequency of use or only use certain functions.

20:30
Researcher:
好的，非常感谢您的分享，对我们的研究很有帮助。

Okay, thank you very much for your sharing, it has been very helpful for our research.

20:50
Respondent 15:
不客气。

You're welcome.

**Interview 16**

00:00
可以听到我声音吗？
Can you hear me clearly?

00:05
Respondent 16:
嗯，可以。
Yes, I can.

00:30
Researcher:
我们今天主要想聊聊你平时使用信息化教学工具的经历和感受，放松一点，如实回答就好。
Today we’ll discuss your experiences using digital learning tools. Please relax and answer honestly.

00:40
Respondent 16:
好的。
Alright.

01:01
Researcher:
你经常使用哪些信息化教学工具？
Which digital learning tools do you frequently use?

01:25
Respondent 16:
主要用雨课堂，偶尔也会用职教云和超星，频率还算挺高的，每周至少3到4次。
Mostly Rain Classroom, occasionally Cloud Classroom and ChaoXing. About three or four times weekly.

02:00
Researcher:
你一般在什么情境下使用这些工具？
In what contexts do you usually use these tools?

02:22
Respondent 16:
课堂上老师布置任务时用得最多，有时候课后也会用来复习和预习。
Primarily during class for assigned tasks, sometimes also for review or preview afterward.

03:00
Researcher:
你觉得这些工具对你学习的帮助大吗？
Do you find these tools significantly helpful for your learning?

03:27
Respondent 16:
总体上帮助挺大的吧，但有时候也会带来一些困扰。
Overall, quite helpful, but sometimes they can also cause issues.

04:15
Researcher:
在使用过程中有没有过主动中断或暂停使用的情况？
Have you ever voluntarily stopped or paused your usage?

04:36
Respondent 16:
偶尔会，尤其是情绪不太好的时候。
Occasionally, especially when I'm in a bad mood.

05:04
Researcher:
你提到的情绪不太好，具体指哪些情绪呢？
Could you specify these negative emotions?

05:35
Respondent 16:
主要是焦虑吧，还有一些不满意和偶尔的抑郁。
Mainly anxiety, some dissatisfaction, and occasional depression.

06:00
Researcher:
我们先谈谈焦虑，你一般在什么情况下会产生焦虑？
Let's discuss anxiety first. When do you usually feel anxious?

06:29
Respondent 16:
比如老师发布互动任务时，我很担心网速太慢导致提交不上去，上课答题的时候尤其明显，总觉得自己准备得还不够好，很紧张。
When teachers post interactive tasks, I'm anxious about slow internet speed preventing submission. Particularly when answering questions in class, I feel inadequately prepared, very nervous.

07:03
Researcher:
这种焦虑会怎么影响你的使用行为？
How does this anxiety affect your usage behavior?

07:29
Respondent 16:
焦虑时我容易选择回避，比如干脆退出平台，过一会儿再回来，或者等下次课再用。
When anxious, I tend to avoid, sometimes logging out entirely, returning later or waiting until next class.

08:20
Researcher:
你刚刚提到不满意，这种不满意一般表现在哪些方面？
You mentioned dissatisfaction earlier; what aspects typically trigger this feeling?

09:00
Respondent 16:
主要是技术上的问题吧，比如雨课堂经常卡顿，提交任务时出现错误提示。还有界面设计得不是很友好，让我不确定是否提交成功，就感觉很烦躁。
Mainly technical issues, like frequent lagging or submission errors. Also, the interface isn't user-friendly, causing uncertainty about successful submissions and frustration.

10:00 Researcher:
这种情况发生频繁吗？
Does this happen frequently?

10:28 Respondent 16:
还算频繁，差不多每两三次用就会出现一次这种情况。
Fairly frequently, about every two or three uses.

11:03 Researcher:
我们再聊一下你提到的轻度抑郁，这又是什么原因导致的呢？
Regarding mild depression you mentioned, what usually causes this?

11:38 Respondent 16:
有时候我花了很多精力准备的作业或回答，得分却不如同学的随意回答高。感觉自己的努力好像没什么用，心情就会比较低落，有点失落感。

Sometimes after putting significant effort into tasks or responses, I receive lower scores than classmates' casual answers. It feels as if my efforts are futile, leading to disappointment and mild depression.

12:36 Researcher:
你遇到这种情况，会持续多久？
How long does this feeling usually last?

13:00 Respondent 16:
短则一两天，长的时候甚至一周或更长，总觉得很难再有动力继续用下去。
One or two days for short periods, up to a week or longer. It severely reduces my motivation to continue.

13:20 Researcher:
面对这些负面情绪，你通常是如何应对的呢？
How do you typically cope with these negative emotions?

13:30
Respondent 16:
一般会休息一下，听听音乐，或者做些自己喜欢的事情，比如画画、看书，等情绪好一点再回去用软件。
Usually, I rest, listen to music, or engage in enjoyable activities like drawing or reading, returning when my mood improves.

14:03 Researcher:
你觉得老师或平台能做些什么，帮助你更好地缓解这些情绪呢？
What could teachers or platforms do to better alleviate these emotions?

14:19 Respondent 16:
希望老师能够给足够的答题时间，减少竞争感，平台也能尽量优化稳定性，减少技术上的问题。还有，如果老师能更关注我们这些平时比较安静的学生，会更有安全感一点吧。
I wish teachers provided adequate time for tasks, reducing competition. Platforms should improve stability to minimize technical issues. Moreover, more teacher attention to quieter students like me could enhance our sense of security.

15:00 Researcher:
你有过差点彻底放弃但最终还是坚持下来的经历吗？
Have you ever nearly quit completely but eventually persevered?

15:40 Respondent 16:
有过，尤其考试前压力很大的时候，想到如果彻底放弃可能影响成绩，最后还是强迫自己继续使用了。
Yes, especially during exam periods under immense pressure. Thinking quitting might impact my results, I forced myself to continue.

15:55 Researcher:
你对未来信息化工具的使用有什么期望吗？
Any expectations for future digital learning tools?

16:11 Respondent 16:
希望界面更友好一些，技术更稳定一些，任务的提示也再清楚一些，减少不必要的焦虑和困扰吧。
More user-friendly interfaces, stable technology, clearer task instructions, reducing unnecessary anxiety and stress.

16:30 Researcher:
谢谢你，今天聊得很深入，对我们研究很有帮助。
Thank you. Today's in-depth discussion greatly helps our research..

17:00
Respondent 16:
不客气。

**Interview 17**

00:02 Researcher:
您好，感谢参与本次访谈。我们想了解您使用信息化教学工具的经历，以及情绪对您使用这些工具的影响。回答没有对错，如实分享即可，信息会严格保密。

Hello, thank you for participating in this interview. We would like to understand your experience in using information-based teaching tools and the impact of emotions on your use of these tools. There are no right or wrong answers—just share your honest experience. All information will be kept strictly confidential.

00:20 Respondent 17:
好的，我先想一想。

Okay.

00:25 Researcher:
我们今天主要聊聊你使用信息化教学工具的感受，特别是情绪方面的经历。请你放松一点，如实回答就好。
Today, we’ll discuss your experiences using digital learning tools, especially your emotional experiences. Just relax and answer honestly.

00:55 Respondent 17:
好的，我会尽量说清楚。
Alright, I'll try to be clear.

01:00 Researcher:
你平时经常使用哪些信息化学习工具？使用的频率如何？
Which digital learning tools do you frequently use, and how often?

01:25 Respondent 17:
主要用雨课堂和职教云，偶尔会使用慕课平台吧。频率大概一周四五次吧，课上老师要求用的比较多。

Mainly Rain Classroom and Cloud Classroom, occasionally MOOCs. About four or five times weekly, mostly during class as required by teachers.

02:12 Researcher:
使用过程中，通常遇到过哪些问题吗？
What issues do you typically encounter during use?0

02:35 Respondent 17:
主要是平台本身不稳定，经常会卡顿，有时候老师布置的任务也太难了，感觉有点压力。
Mainly platform instability and frequent lags. Sometimes tasks assigned by teachers are also quite challenging, causing some pressure.

03:00 Researcher:
你提到压力，具体是什么样的压力呢？
You mentioned pressure—could you specify what kind?

03:27 Respondent 17:
主要来自和同学的对比吧，比如班级人多，大家竞争激烈，有时候看到其他同学很快完成任务，我会觉得自己慢了很多，感觉很有压力。
Mainly from comparing myself with peers. Classes have many students and fierce competition. When others quickly complete tasks, I feel significantly slower, causing considerable pressure.

04:15 Researcher:
这种压力对你的使用习惯造成了什么影响？
How does this pressure influence your usage habits?

04:33 Respondent 17:
压力大的时候会产生一些焦虑，焦虑之后就容易放弃使用，有时候干脆暂停一下，稍后再回来。
When feeling significant pressure, I experience anxiety, leading me to temporarily stop using these tools, returning after a while.

05:00 Researcher:
你刚才提到的焦虑，一般在什么时候表现得特别明显？
When do you typically feel most anxious?

05:26 Respondent 17:
主要在课堂互动或者小组任务的时候，因为我不太擅长和同学们沟通，每次轮到我们小组展示或回答问题，我都特别紧张，甚至会提前退出平台来回避一下。
Primarily during class interactions or group tasks, as I'm not good at communicating with classmates. When it's our group's turn to present or answer, I get extremely nervous, sometimes even logging out to avoid it temporarily.

06:19 Researcher:
你还提到抑郁，这种抑郁感是怎样产生的？
You also mentioned depression—what usually triggers this feeling?

06:30 Respondent 17:
大部分时候是因为自己表现得不够好，尤其是小组任务结果不理想时，会觉得很失落，有时候甚至会影响我之后几天使用工具的心情和意愿。
Mostly due to unsatisfactory performance, especially disappointing group task results. This makes me feel down, sometimes affecting my mood and willingness to use the tools for several days.

07:00 Researcher:
这种抑郁通常持续多久？

How long does this depressive feeling usually last?

07:25 Respondent 17:
短一点的两三天，长的话可能会持续一周，感觉恢复起来挺困难的。
Two or three days at the shortest, but it can last up to a week, making recovery quite challenging.

08:00 Researcher:
你平时怎么应对这些负面情绪呢？
How do you usually cope with these negative emotions?

08:31 Respondent 17:
我一般选择一个人静一静，比如看会儿电影、听音乐，等情绪稳定一点，再回去继续使用这些平台。
Usually, I prefer quiet time alone, watching movies or listening to music, and then returning when my mood stabilizes.

09:39 Researcher:
你希望老师或者学校能提供怎样的帮助，以减轻这些负面情绪带来的影响？
What kind of help from teachers or the school would you wish for, to alleviate these negative emotional impacts?

10:00 Respondent 17:
我希望老师能给一些额外的练习题或者资料，这样我可以私下多练习一下，弥补课堂表现的不足。另外，老师也可以多用一些鼓励性的方式，比如表扬一下像我这样安静的同学，可能会让我更自信、更愿意参与。
I hope teachers provide additional exercises or materials, allowing me extra practice privately to compensate for poor class performance. Additionally, teachers giving encouragement or praise to quieter students like me might enhance my confidence and participation.

11:18 Researcher:
回想一下，有没有哪一次你差点因为情绪问题彻底放弃使用这些工具，但最终坚持下来了？原因是什么？

Can you recall a time when you almost entirely abandoned these tools due to emotional problems but ultimately persisted? What motivated you?

11:41 Respondent 17:
有过，尤其是一次小组作业做得特别差，我特别想放弃，但后来想到期末成绩，还是硬着头皮坚持了下来。而且朋友也鼓励我，说大家都有这样的时候，我才慢慢坚持下去的。
Yes, once after performing poorly in a group task, I strongly wanted to quit, but considering final grades, I forced myself to persist. Friends encouraged me too, reminding me everyone faces such difficulties, which helped me continue.

12:10 Researcher:
未来你对信息化工具的设计或使用有什么期待？
What expectations do you have for future digital learning tool design or usage?

12:44 Respondent 17:
希望平台更加稳定，减少卡顿。另外互动设计再简单明确一点，比如给我们更多独立练习的空间，而不是总需要竞争回答，这样对我这种比较安静的学生会更友好一点吧。
I hope for greater platform stability, fewer lags, and simpler, clearer interactions, like providing more independent practice opportunities rather than always competitive answering. This would be friendlier to quieter students like me.

13:30 Researcher:
好的，非常感谢你的分享，这些信息对我们研究非常有帮助。
Great, thank you for sharing. Your insights greatly benefit our research.

14:00 Respondent 17:
不客气，很高兴能帮到你们。
You’re welcome, happy to help.

Interview 18

00:00 Researcher:
能听清楚我的声音吗？
Can you hear me clearly?

00:12 Respondent 18:
嗯，可以听到。
Yes, I can hear you.

00:30 Researcher:
我们今天的访谈会比较深入一些，可能时间稍微长一点，你放轻松，慢慢来就行了。
Today's interview will be in-depth and a bit lengthy. Just relax and take your time.

00:45 Respondent 18:
好的。
Alright

01:00 Researcher:
你平时主要用哪些信息化学习工具呢？
What digital learning tools do you usually use?

01:15 Respondent 18:
主要是雨课堂，有时候也用职教云，偶尔用超星。
Mainly Rain Classroom, sometimes Cloud Classroom, occasionally ChaoXing.

02:00 Researcher:
频率大概是怎么样的呢？
How frequently do you use them?

02:17 Respondent 18:
每周大概三四次吧，上课和课后都有用。
About three or four times a week, both during and after class.

03:04 Researcher:
你觉得使用这些工具对你的学习帮助大吗？
Do you find these tools significantly helpful for your learning?

03:32 Respondent 18:
嗯，有一点帮助，但有时候也觉得用起来压力挺大的，特别是基础不好的时候。
A little helpful, but sometimes it's quite stressful, especially since my basic skills aren’t strong.

04:16 Researcher:
你刚才提到了“压力”，具体是什么原因带来的压力呢？
You mentioned "stress." What's the main source of this stress?

04:22 Respondent 18:
压力主要是我自己基础比较差，跟不上老师讲的内容，特别是任务一多，我就很紧张，怕自己完成不了。
Mainly from my weak foundation. I struggle to keep up with teachers, especially when tasks pile up, making me very nervous about not completing them.

05:05 Researcher:
你提到了“紧张”，这种紧张对你使用这些工具有什么影响吗？
You mentioned feeling nervous—how does this nervousness affect your usage?

05:41 Respondent 18:
每次紧张的时候，我就容易退出，干脆不去做任务，想等到自己冷静下来再说，但有时候就一直拖延下去了。
Whenever nervous, I tend to quit and avoid tasks, hoping to return later once calm, but sometimes I end up procrastinating indefinitely.

06:10 Researcher:
你觉得这些工具或者任务布置的不满意的地方主要有哪些？
What aspects of these tools or task assignments make you feel dissatisfied?

06:39 Respondent 18:
任务量太大了，而且界面提示也不太清楚，感觉用起来很困难，时间久了心里就很抵触了。
Tasks are too many, interface instructions unclear, making usage difficult. Over time, I become resistant to using them.

07:05 Researcher:

你也提到了“抑郁”的情绪，这种情绪又是怎么产生的呢？
You also mentioned depression. How does this feeling arise?

07:34 Respondent 18:
主要是觉得自己努力了，但成绩总是不太理想，付出的时间和精力好像没什么回报。
Mainly from feeling that despite my efforts, results remain unsatisfactory, making my investment of time and energy seem worthless.

08:06 Researcher:
当你有这种感受的时候，一般会持续多久呢？
How long does this feeling usually last?

08:24 Respondent 18:
短的几天吧，长的可能持续几周，有时候甚至一个月都不想再碰学习平台。
A few days at shortest, up to weeks or even a month during prolonged periods, making me avoid learning platforms completely.

09:10 Researcher:
你还提到过“担忧”，具体指的是什么担忧呢？
You also mentioned worries—what specifically do you worry about?

09:40 Respondent 18:
有时候看到其他同学在课堂互动环节回答问题特别好，老师还表扬他们，我就觉主要是担心如果我继续这样下去，可能没办法顺利毕业吧。有时候越想越害怕，不知道该怎么办才好。
Mainly concerned about not graduating smoothly if this continues. Sometimes, the more I think, the more scared I become, unsure of what to do.

10:10 Researcher:
你通常是怎样去应对这些负面情绪的呢？
How do you typically cope with these negative emotions?

10:30 Respondent 18:
一般会先停下来，做点别的事情转移注意力，比如出去走走、听音乐，等心情好一点再尝试回来继续学习。
Usually, I pause, distracting myself by doing other things like taking a walk or listening to music, returning once my mood improves.

11:00 Researcher:
你觉得老师或学校能够提供哪些支持，来帮助你更好地应对这些情绪呢？
What support from teachers or the school could help you better manage these emotions?

11:40 Respondent 18:
我希望老师能给我们提供一些适合基础较差学生的自学材料，课后能自己慢慢练习，这样我可能不会那么害怕课堂上表现不好了。还有就是任务布置上能不能稍微减少一点或者循序渐进一点。
I hope teachers provide self-study materials tailored for students with weaker foundations, allowing slow, independent practice afterward, reducing my fear of poor in-class performance. Additionally, gradually assigned tasks might reduce stress.

12:30 Researcher:
有没有哪一次你差点因为这些情绪彻底放弃了，但最后坚持下来了？原因是什么？
Have you ever nearly abandoned these platforms completely due to emotions but ultimately persevered? Why?

13:20 Respondent 18:
有一次临近期末考试压力特别大，我差点完全放弃平台上的复习。但后来想到如果不坚持可能真的不能毕业，觉得更害怕了，就强迫自己继续用了。
Once near final exams, immense pressure almost made me abandon reviewing on the platform. But the greater fear of not graduating compelled me to continue.

13:52 Researcher:
你对未来信息化工具的设计有什么期望吗？
Any expectations for future digital learning tool design?

14:20 Respondent 18:
希望平台能设计得更简单直观一点，减少复杂的任务步骤，也希望平台提供更多基础性的练习资源，帮助像我这样基础不好的学生慢慢跟上进度。
Simpler, more intuitive platform design with fewer complicated steps, and more basic practice resources for students like me to gradually keep pace.

15:30 Researcher:
今天真的聊得很深入，非常感谢你的配合和耐心。
We had an in-depth discussion today. Thank you very much for your cooperation and patience?

16:00 Respondent 18:
不客气，很开心能帮助到你们的研究。
You’re welcome; glad to contribute to your research.

Interview 19

00:00 Researcher:

您好，感谢参与本次访谈。我们想了解您使用信息化教学工具的经历，以及情绪对您使用这些工具的影响。回答没有对错，如实分享即可，信息会严格保密。

Hello, thank you for participating in this interview. We would like to understand your experience in using information-based teaching tools and the impact of emotions on your use of these tools. There are no right or wrong answers—just share your honest experience. All information will be kept strictly confidential.

00:20 Respondent 19:
好的，我先想一想。

Okay, let me think first.

00:30 Researcher:
你平常会经常使用哪些信息化学习工具呢？

Which digital learning tools do you usually use?

00:48 Respondent 19:
平常主要就是雨课堂，还有职教云、慕课这些，每周差不多五六次吧。
Mainly Rain Classroom, also Cloud Classroom and MOOCs, about five to six times weekly.

01:04 Researcher:
你觉得这些工具对你学习的帮助如何？
How helpful do you find these tools for your learning?

01:15 Respondent 19:
整体上帮助还是挺大的，能提高效率，但也存在一些问题，比如互动反馈不够好。
Generally helpful for efficiency, but there are issues, like insufficient interactive feedback.

01:40 Researcher:
你刚刚提到互动反馈的问题，具体是什么情况？
You mentioned issues with interactive feedback. Can you elaborate?

02:05 Respondent 19:
我平时积极参与课堂互动，也很认真做作业，但经常分数不理想，有时候提交答案或留言互动都得不到老师的关注，感觉挺失望的。
Despite actively participating and carefully completing assignments, my scores often disappoint. My submitted answers or comments sometimes go unnoticed by teachers, causing strong disappointment.

03:00 Researcher:
你提到的失望感经常出现吗？
Do you often experience this disappointment?

03:20 Respondent 19:
经常啊，每次付出了很多但反馈不好的时候，都会有这种情绪。
Often, whenever effort invested isn't matched by good feedback.

03:55 Researcher:
这种失望通常对你有什么影响？
How does this disappointment usually affect you?

04:10 Respondent 19:
影响挺大的。有时候连续几次得不到反馈，我干脆就停止用平台一段时间了，感觉没有意义了，反正老师也看不到。
Considerable impact. After repeated poor feedback, I sometimes stop using the platform entirely for a while, feeling it's meaningless if teachers won't notice.

04:51 Researcher:
你一般会中辍多长时间？
How long do these dropout periods usually last?

05:10 Respondent 19:
短的几天，长的话可能一两周都有，直到我觉得情绪恢复一点才回来继续。
From a few days at minimum to one or two weeks at longest, until my mood recovers enough to resume.

06:00 Researcher:
除了互动反馈不好，还有其他原因会引起你的失望情绪吗？
Besides poor interactive feedback, any other sources of disappointment?

06:20 Respondent 19:
有时候也觉得任务太多，完成得很累但成绩还不好，也会挺失望的。
Sometimes excessive tasks causing exhaustion without good results also trigger disappointment.

07:00 Researcher:
这种情况发生时，你的情绪和想法一般是怎样的？
What emotions and thoughts arise during these instances?

07:25 Respondent 19:
主要觉得自己的付出得不到认可，很沮丧，有时候也会质疑自己是不是不够好，慢慢就失去动力了。
Primarily feeling unrecognized efforts, frustration, sometimes self-doubt regarding my abilities, gradually losing motivation.

08:02 Researcher:
你通常会怎么应对这种失望情绪呢？
How do you typically cope with disappointment?

08:23 Respondent 19:
一般我会选择跟朋友聊聊，或者去运动一下转移注意力，等心情好一些再回来继续用平台。
Usually, I talk to friends or exercise to distract myself, returning when feeling better.

09:00 Researcher:
有没有哪一次你本来彻底不想用了，但最后还是继续坚持了？是什么原因？
Have you ever nearly quit completely but ultimately persevered? What prompted this?

09:40 Respondent 19:
有一次期中考试前连续得不到互动反馈，特别失望，差点完全放弃平台复习。但想到考试成绩，最后硬着头皮坚持下去了。朋友也鼓励我，说其实老师可能没注意，不是针对我个人的。
Once before midterms, continuous lack of feedback nearly led to complete abandonment of platform review. However, the prospect of exam scores compelled persistence. Friends also reassured me teachers probably didn't intentionally ignore me.

10:20 Researcher:
你觉得老师或者平台怎样做能帮你减少这种失望感？
How could teachers or platforms help reduce your disappointment?

11:11 Respondent 19:
我觉得平台可以设计更公平的互动展示方式，不要总是突出少数几个同学。老师也可以适当关注一下我们这些平时认真但互动不够显眼的学生，偶尔也给我们一些鼓励或反馈，这样我的动力可能就足一点。
Platforms could design fairer interaction displays, not always highlighting select few students. Teachers could pay occasional attention to dedicated yet less visible students, offering encouragement or feedback, boosting our motivation.

12:00 Researcher:
好的，今天真的聊得非常深入，非常感谢你的配合和耐心。
We had a deeply informative conversation today. Thanks for your cooperation and patience.

12:20 Respondent 19:
不用谢啊，我也挺开心能聊这些事情的。
You're welcome. I'm also glad to discuss these topics..

**Interview 20**

00:00
Researcher:
您好，感谢参与本次访谈。我们想了解您使用信息化教学工具的经历，以及情绪对您使用这些工具的影响。回答没有对错，如实分享即可，信息会严格保密。

Hello, thank you for participating in this interview. We would like to understand your experience in using information-based teaching tools and the impact of emotions on your use of these tools. There are no right or wrong answers—just share your honest experience. All information will be kept strictly confidential.

00:20
Respondent 20:
好的，我先想一想。

Okay, let me think first.

00:30 Researcher:
可以听清楚我的声音吧？今天访谈时间比较长，我们慢慢聊，有需要休息随时告诉我。
Can you hear me clearly? Today's interview will be long, so we'll take it slow. Tell me if you need a break.

00:40 Respondent 20:
没问题，可以听清楚的！我准备好了。
No problem, I can hear you clearly! I'm ready.

01:10 Researcher:
你平时使用哪些信息化学习工具比较多呢？
Which digital learning tools do you use most frequently?

01:35 Respondent 20:
主要用雨课堂、职教云，有时也用慕课，频率挺高的，每周差不多五次吧，老师经常布置任务。
Mostly Rain Classroom and Cloud Classroom, sometimes MOOCs. Frequently, about five times per week, as teachers often assign tasks.

02:00 Researcher:
你觉得这些工具对你学习帮助大吗？
Do you find these tools significantly helpful for your learning?

02:35 Respondent 20:
帮助肯定是有的，毕竟很多内容都要在上面完成，但同时压力也挺大的。
They definitely help, since many tasks rely on them, but simultaneously they're quite stressful.

03:10 Researcher:
你刚刚提到压力具体来自哪里？
Where does this pressure you mentioned specifically come from?

03:43 Respondent 20:
主要是任务量太大了。我基础本来就一般，每次打开平台看到密密麻麻的任务就特别有压力，有时根本不知道从哪里开始，干脆不想做了。
Mainly from excessive tasks. Given my average skills, seeing dense tasks on platforms feels overwhelming. Sometimes, not knowing where to start, I simply avoid doing them.

04:15 Researcher:
这种压力频繁吗？对你影响大吗？
Is this pressure frequent, and how significantly does it affect you?

04:42 Respondent 20:
很频繁，每次任务一多就会特别明显，影响特别大，经常让我想干脆放弃使用这些平台。
Very frequent, especially noticeable whenever tasks accumulate. It significantly impacts me, often making me consider abandoning these platforms entirely.

05:21 Researcher:
你刚才还提到倦怠，这种倦怠是怎么产生的呢？
You also mentioned burnout. How does this burnout occur?

05:55 Respondent 20:
主要是因为任务反复又多又繁琐，经常长时间盯着屏幕感觉特别疲惫，久而久之就变成了一种倦怠感，觉得特别没意思，没动力继续了。
Mainly from repetitive, numerous, and tedious tasks. Long periods staring at screens cause extreme fatigue, gradually transforming into burnout, diminishing motivation.

06:36 Researcher:
这种倦怠通常持续多久呢？

How long does this burnout typically last?

06:50 Respondent 20:
短一点可能三五天，长的时候能持续两三周，感觉特别难调整回来。

Three to five days for shorter periods, but can extend to two or three weeks for longer ones, making recovery challenging.

07:15 Researcher:
倦怠感严重时你通常会怎么做？

What do you typically do when experiencing severe burnout?

07:45 Respondent 20:
一般就干脆暂停不用这些平台了，去做点别的，比如找朋友聊天、出去走走或者看看剧，直到感觉心情恢复一些再回来。

Usually, I pause platform use completely, opting to chat with friends, take walks, or watch TV shows, returning once mood improves.

08:20 Researcher:
有没有哪些情况会特别加剧你的倦怠或压力感呢？
Are there particular situations intensifying your burnout or pressure?

08:50 Respondent 20:
主要是期末或者期中考试前，任务更多、时间更紧的时候，倦怠和压力感就会特别明显，经常让我想完全放弃。

Mainly before midterms or finals, when tasks increase and time constraints tighten, significantly amplifying burnout and pressure, often making me consider complete abandonment.

09:30 Researcher:
你平时是如何缓解这些压力和倦怠的？

How do you usually alleviate this stress and burnout?

10:00 Respondent 20:
除了刚刚说的出去散散心外，有时也会找一些简单易做的任务，先做完提高一点自信，再慢慢回到比较困难的任务上。

Besides previously mentioned relaxation methods, sometimes I pick simpler tasks first to boost confidence, gradually returning to tougher ones.

11:00 Researcher:
你觉得老师或学校怎么做能够更好地帮助你减轻压力和倦怠呢？

How could teachers or the school better help reduce your stress and burnout?

11:34 Respondent 20:
希望老师能适当降低任务难度和数量，或者把任务分阶段逐步进行，这样我压力可能会小一些。另外如果老师能多鼓励一下我们这些基础一般的学生，可能动力会好一些。
Teachers reducing task difficulty or quantity, or assigning tasks in stages, would help alleviate my stress. Additionally, more encouragement for average-skilled students like me would enhance motivation.

12:06 Researcher:
有没有哪一次你几乎彻底放弃，但最终坚持了下来？是什么促使你坚持的？
Have you ever nearly quit completely but eventually persisted? What prompted your perseverance?

12:32 Respondent 20:
有一次期末考试前压力特别大，倦怠感也很严重，我几乎完全放弃了平台复习。但后来想到如果放弃可能考试真的过不了，家里人也会很失望，就硬着头皮坚持了下来。
Once before finals, severe stress and burnout nearly caused complete abandonment of platform review. However, considering potential exam failure and family disappointment, I forced myself to persist.

13:30 Researcher:
你对未来平台设计有什么期待吗？
Any expectations for future platform designs?

14:00 Respondent 20:
希望未来平台能更清晰简单一些，任务布置不要那么密集，更友好一点，降低一些基础门槛，让我们这些基础一般的学生也能更轻松地用起来，减少压力和倦怠。
Future platforms should be clearer and simpler, with less densely packed tasks and lower entry barriers, enabling students with average skills to use them more easily, reducing stress and burnout.

15:26 Researcher:
今天真的聊得非常深入，非常感谢你的配合和耐心。
We had a very deep and informative conversation today. Thanks greatly for your cooperation and patience.

16:00 Respondent 20:
不客气，我觉得能聊聊这些也挺好的，谢谢你耐心听我说这么多。
You're welcome. I'm glad we could discuss these topics. Thank you for patiently listening to me.
