# Supplementary material for: Unravelling the Mechanisms of Student Negative Emotions in Technology-Mediated Intermittent Dropout: A Mixed-Methods fsQCA Study
Source: Research Square preprint supplement (doi:10.21203/rs.3.rs-6971678/v1), 2025-09-08
Supplement: Supplementary file 2 [file e7f490fe32ca23db4b4f1f2b.xlsx]

## Sheet: data
序号	1. 您的性别:	2. 您的年龄:	3. 您目前的教育水平:	4. 您使用信息化教学工具（如雨课堂、在线学习平台等）的频率:	5. 在使用信息化教学工具时，我会中途退出课程或活动一段时间。	6. 我会部分屏蔽使用信息化教学工具布置的功能或任务。	7. 我经常放弃使用信息化教学工具进行学习，等到有需要了再加入。	8. 在使用信息化教学工具时，我感到非常焦虑。	9. 我担心自己无法顺利使用信息化教学工具。	10. 使用信息化教学工具时，我会感到紧张和不安。	11. 我在使用信息化教学工具时会感到压力很大。	12. 我会因为害怕出错而感到焦虑。	13. 在使用信息化教学工具时，我感到非常沮丧。	14. 我觉得使用信息化教学工具非常困难，以至于感到沮丧。	15. 我因为无法达到期望的学习效果而感到沮丧。	16. 我感到使用信息化教学工具使我的学习变得更加复杂。	17. 我因为在信息化教学工具中遇到的问题感到挫败。	18. 我对信息化教学工具的使用体验感到不满意。	19. 我觉得信息化教学工具并没有提高我的学习效果。	20. 我对信息化教学工具的界面设计和操作感到不满意。	21. 我认为信息化教学工具的内容质量不高。	22. 我对信息化教学工具的技术支持服务感到不满意。	23. 我担心信息化教学工具的技术问题会影响我的学习进度。	24. 我担心自己无法适应信息化教学工具的使用。	25. 我担心信息化教学工具的安全性和隐私保护。	26. 我担心在使用信息化教学工具时会遇到无法解决的问题。	27. 我担心信息化教学工具的使用效果不如传统教学方法。
1	2	2	2	2	3	3	3	3	3	3	3	4	2	1	3	3	3	3	3	3	3	3	3	3	3	3	3
2	2	2	2	1	3	3	3	3	3	3	3	3	3	3	3	3	3	3	3	3	3	3	3	3	3	3	3
3	1	2	2	2	3	3	3	3	3	3	3	3	3	3	3	3	3	3	3	3	3	3	3	3	3	3	3
4	1	2	2	1	3	3	3	3	3	3	3	3	2	2	3	2	2	4	3	2	2	2	2	2	2	2	2
5	1	2	2	2	3	1	1	1	3	1	1	3	1	3	3	1	3	3	3	3	3	3	3	3	1	3	3
6	1	2	2	1	3	3	3	3	3	3	2	2	3	3	3	3	3	3	3	3	3	3	3	2	2	3	2
7	1	2	2	1	3	1	1	1	1	1	1	3	1	1	3	1	1	1	1	1	1	1	1	1	1	1	1
8	1	2	2	2	3	3	3	3	3	3	1	5	1	1	3	1	3	1	3	3	3	3	3	3	3	3	3
9	1	2	2	1	4	3	2	1	2	1	1	1	1	1	2	3	3	2	3	3	3	3	2	2	2	2	3
10	1	2	2	2	3	1	2	1	2	1	1	2	1	1	1	1	1	1	2	1	2	2	1	2	2	1	3
11	1	2	2	2	3	1	1	3	3	4	3	5	1	1	4	3	3	3	3	3	3	3	3	1	1	3	3
12	1	2	2	2	3	3	3	3	3	3	2	4	2	2	5	2	3	1	1	4	3	3	1	3	3	3	3
13	1	2	2	2	2	2	2	2	2	2	2	2	2	2	2	2	2	2	2	2	2	2	2	2	2	2	2
14	2	2	2	2	3	3	3	3	3	3	2	3	2	3	4	3	3	2	2	2	2	2	2	3	3	3	3
15	2	2	2	2	3	1	2	1	1	1	1	1	1	1	1	1	2	2	2	2	2	1	1	1	1	1	1
16	1	2	2	1	3	3	3	3	3	3	3	3	3	3	3	3	3	3	3	3	3	3	3	3	3	3	3
17	2	2	2	2	3	3	3	2	3	1	1	1	1	1	1	1	1	1	1	1	1	1	1	1	3	1	3
18	1	2	2	2	3	3	3	3	3	3	3	3	3	3	3	3	3	3	3	3	3	3	3	3	3	3	3
19	1	2	2	2	3	3	3	1	3	1	1	3	1	1	3	1	1	1	1	1	1	1	1	1	3	1	1
20	2	2	2	1	3	3	2	2	2	2	1	3	2	2	4	2	2	2	2	2	2	2	2	2	2	2	2
21	1	2	2	2	3	1	3	3	3	3	3	5	3	3	3	3	3	2	3	1	1	3	2	4	4	4	4
22	1	2	2	2	3	1	3	1	3	2	2	4	1	3	5	3	2	3	3	1	1	1	1	2	3	4	3
23	1	2	2	2	3	1	3	3	3	1	1	3	2	2	3	3	2	3	3	3	3	3	3	3	3	3	3
24	1	2	2	2	3	1	1	1	1	1	1	1	1	1	1	1	1	1	1	1	1	1	1	1	1	1	1
25	1	2	2	1	3	1	1	1	1	1	1	1	1	1	1	1	1	1	1	1	1	1	1	1	1	1	1
26	2	2	2	2	3	1	1	1	4	2	1	3	1	1	1	1	1	2	2	2	1	1	2	3	3	3	3
27	2	2	2	2	3	3	3	3	3	3	3	3	3	3	3	3	3	3	3	3	3	3	3	3	3	3	3
28	1	2	2	1	3	3	3	3	3	3	3	3	3	3	3	3	3	3	3	3	3	3	3	3	3	3	3
29	2	2	2	5	1	1	1	1	1	1	1	1	1	1	1	1	1	1	1	1	1	1	1	1	1	1	1
30	2	2	2	3	1	1	1	1	1	1	1	1	1	1	1	1	1	1	1	1	1	1	1	1	1	1	1
31	1	2	2	5	1	1	1	1	1	1	1	1	1	1	1	1	1	1	1	1	1	1	1	1	1	1	1
32	2	2	2	4	3	3	3	3	4	2	3	4	2	2	2	2	2	3	3	3	2	2	2	3	4	4	3
33	1	2	2	5	1	1	3	1	1	1	1	3	1	1	1	1	1	1	1	1	3	3	3	3	3	1	3
34	2	2	2	2	3	3	3	3	3	3	3	3	3	3	3	3	3	3	3	3	3	3	3	3	3	3	3
35	1	2	2	2	1	1	1	1	1	1	1	1	1	1	1	1	1	1	1	1	1	1	1	1	1	1	1
36	2	2	2	2	3	3	3	3	3	3	3	3	3	3	3	3	3	3	3	3	3	3	3	3	3	3	3
37	2	2	2	5	1	1	3	1	3	3	3	1	1	1	1	1	1	1	1	1	1	1	1	1	5	1	3
38	2	2	2	3	3	3	3	3	3	3	3	3	3	3	3	3	3	3	3	3	3	3	3	3	3	3	4
39	2	2	2	3	3	3	3	3	3	3	3	3	3	3	3	3	3	3	3	3	3	3	3	3	3	3	3
40	1	2	2	2	3	1	3	3	3	1	1	1	1	1	3	3	3	3	3	3	3	3	3	3	3	4	3
41	2	2	2	2	3	3	3	3	3	3	3	3	3	3	3	3	3	3	3	3	3	3	3	3	3	3	3
42	2	2	2	2	3	3	3	4	3	3	3	3	3	3	3	3	3	3	3	3	3	3	4	3	4	4	3
43	2	2	2	2	3	3	3	1	1	1	1	1	1	1	1	1	1	3	3	3	3	3	3	1	2	3	3
44	1	2	2	2	3	3	3	3	3	3	3	3	1	3	3	3	3	3	4	3	3	3	3	3	3	3	3
45	1	2	2	1	3	3	3	3	3	3	3	3	3	3	3	3	3	3	3	3	3	3	3	3	3	3	3
46	1	2	2	2	3	2	3	3	5	1	1	4	3	3	3	3	3	3	3	3	3	3	2	3	5	5	5
47	2	2	2	2	3	3	2	2	4	3	3	4	2	3	4	3	2	2	3	3	3	3	2	3	3	4	4
48	1	2	2	2	3	3	2	2	2	3	3	4	3	3	3	3	2	3	4	3	3	3	3	3	3	3	3
49	2	2	2	2	3	3	3	3	3	3	3	3	3	3	3	3	3	3	3	3	3	3	3	3	3	3	3
50	2	2	2	5	2	2	2	2	3	3	2	3	2	2	4	3	3	3	3	3	3	3	3	3	4	4	3
51	2	2	2	2	2	2	2	2	2	2	3	3	3	3	3	3	3	3	3	3	3	3	3	3	3	3	3
52	2	2	2	2	3	2	2	3	3	3	3	3	3	3	2	3	3	3	3	3	3	3	3	3	3	3	3
53	2	2	2	2	1	1	1	1	1	1	1	1	1	1	1	1	1	1	1	1	1	1	1	1	1	1	1
54	1	2	2	2	3	2	2	2	2	1	1	2	2	2	2	2	2	2	2	2	2	2	2	2	2	2	2
55	1	2	2	2	3	1	3	1	1	1	1	3	1	1	3	1	2	1	1	1	2	2	1	1	4	1	3
56	2	2	2	2	1	1	3	1	3	3	3	5	1	3	3	3	1	1	1	1	1	1	1	3	1	1	1
57	1	2	2	2	2	1	1	3	3	3	3	3	3	3	3	3	3	3	3	3	3	3	3	3	3	3	3
58	1	2	2	2	3	3	3	3	3	3	3	3	3	3	3	3	3	3	3	3	3	3	3	3	3	3	3
59	2	2	2	2	3	3	2	3	3	3	3	3	3	3	3	3	3	3	3	3	3	3	3	3	3	3	3
60	2	2	2	1	1	1	1	1	1	1	1	1	1	1	1	1	1	1	1	1	1	1	1	1	1	1	1
61	1	2	2	2	4	2	2	1	3	3	3	2	2	2	2	2	2	2	2	2	2	2	3	2	2	2	2
62	1	2	2	1	3	2	3	1	1	1	1	1	1	1	1	1	1	1	1	1	1	1	1	1	4	1	1
63	2	2	2	2	3	3	3	2	4	3	2	4	3	4	4	3	4	3	3	2	2	2	3	4	4	4	3
64	2	2	2	2	3	4	4	3	2	3	2	4	3	2	4	2	4	2	2	2	2	2	2	2	2	4	2
65	2	2	2	2	3	1	4	1	3	4	2	4	2	4	4	3	2	3	3	3	3	3	3	4	3	5	2
66	1	2	2	1	3	1	3	3	3	3	3	3	3	3	3	3	3	3	3	3	3	3	3	3	3	3	3
67	2	2	2	1	2	1	1	1	1	1	1	1	1	1	1	1	1	1	1	1	1	1	1	1	1	1	1
68	2	2	2	2	3	3	3	3	3	3	3	3	3	3	3	3	3	2	2	2	2	2	2	2	2	2	2
69	2	2	2	2	5	3	5	2	2	2	2	2	2	2	2	1	1	1	1	1	1	1	1	1	1	1	1
70	1	2	2	2	3	3	1	1	1	2	3	3	3	3	3	3	3	3	3	3	3	1	1	1	3	3	3
71	2	2	2	2	3	1	3	3	3	3	3	3	3	3	3	3	3	3	3	3	3	3	3	3	3	3	3
72	1	2	2	1	3	3	3	1	1	1	1	1	1	1	1	1	1	1	1	1	1	1	1	1	1	1	1
73	1	2	2	2	3	3	3	3	3	3	3	3	3	3	3	3	3	3	3	3	3	3	3	3	3	3	3
74	2	2	2	4	3	3	5	2	2	1	1	1	1	1	3	1	3	3	3	3	3	1	2	1	5	3	2
75	1	2	2	2	5	5	3	3	3	3	3	3	3	3	3	3	3	3	3	3	3	3	3	3	3	3	3
76	1	2	2	4	3	3	3	3	3	3	3	3	3	3	3	3	3	3	3	3	3	3	3	3	3	3	3
77	1	2	2	1	3	3	3	3	2	1	2	3	3	3	3	3	2	3	3	3	3	3	3	3	5	5	3
78	2	2	2	2	2	2	1	3	2	3	3	1	3	2	2	2	2	3	2	2	3	3	3	2	2	2	3
79	2	2	2	2	3	1	5	1	5	1	3	3	1	1	3	3	1	1	1	3	3	1	3	3	3	3	3
80	1	2	2	2	3	3	3	3	3	3	3	4	3	3	3	3	3	3	3	3	3	3	3	3	3	3	3
81	1	2	2	1	1	1	1	1	1	1	1	1	1	1	1	1	1	1	1	1	1	1	1	1	3	3	3
82	2	2	2	3	1	1	1	1	1	1	1	2	1	1	1	1	1	1	1	1	1	1	1	1	1	1	1
83	2	2	2	2	1	1	3	3	3	3	3	3	3	3	3	3	3	3	3	3	3	3	3	3	3	3	3
84	1	2	2	2	3	1	1	2	3	1	1	1	1	1	2	1	1	1	1	1	1	1	1	1	1	1	1
85	2	2	2	2	2	3	2	1	1	1	1	1	1	1	1	1	1	1	1	1	1	1	2	2	2	1	1
86	2	2	2	2	3	3	3	3	3	3	3	3	3	3	3	3	3	3	3	3	3	3	3	3	3	3	3
87	1	2	2	2	1	1	1	1	1	1	1	1	1	1	1	1	1	1	1	1	1	1	1	1	1	1	1
88	1	2	2	2	2	1	1	1	1	1	1	1	1	1	1	1	1	1	1	1	1	1	1	1	1	1	1
89	2	2	2	1	3	3	1	1	1	1	1	1	1	1	1	1	1	1	1	1	1	1	1	1	1	1	1
90	1	2	2	2	3	1	3	1	2	1	1	1	1	1	1	1	1	1	1	1	1	1	1	1	1	1	1
91	2	2	2	5	3	3	3	3	3	3	3	3	3	3	3	3	3	3	3	3	3	3	3	3	3	3	3
92	1	2	2	3	2	2	1	1	3	1	1	1	1	1	1	3	1	1	1	3	1	1	1	1	1	1	1
93	2	2	2	2	3	2	2	3	2	2	3	3	2	1	1	2	2	2	3	3	3	3	3	3	3	3	3
94	2	2	2	5	3	3	3	3	3	3	3	3	3	3	3	3	3	3	3	3	3	3	3	3	3	3	3
95	2	2	2	2	1	1	1	3	3	3	3	3	3	3	3	3	3	3	3	3	3	3	3	3	3	3	3
96	1	2	2	2	3	3	3	3	3	3	3	3	3	3	3	3	3	3	3	3	3	3	3	3	3	3	3
97	1	2	2	2	3	3	3	3	3	3	2	2	1	1	1	1	2	3	3	3	3	3	3	3	3	3	3
98	1	2	2	1	1	1	1	1	1	1	1	1	1	1	1	1	1	1	1	1	1	1	1	1	1	1	1
99	1	2	2	2	3	3	3	3	3	3	3	3	3	3	3	3	3	3	3	3	3	3	3	3	3	3	3
100	1	2	2	5	3	3	3	3	3	3	3	3	3	3	3	3	3	3	3	3	3	3	3	3	3	3	3
101	1	2	2	3	3	3	3	3	3	3	3	3	3	3	3	3	3	3	3	3	3	3	3	3	3	3	3
102	1	2	2	2	3	3	5	1	1	1	1	1	1	1	1	1	1	1	1	1	1	3	1	1	1	1	1
103	2	2	2	1	3	3	3	3	3	3	3	3	3	3	3	3	3	3	3	3	3	3	3	3	3	3	3
104	1	2	2	1	3	1	2	1	3	2	1	2	1	1	2	1	1	2	1	2	2	2	1	2	2	3	2
105	2	2	2	2	3	3	3	3	3	3	3	3	3	3	3	3	3	3	3	3	3	3	3	3	3	3	3
106	1	2	2	2	3	3	3	4	3	3	3	4	2	2	4	3	3	3	3	3	2	3	3	3	2	3	2
107	2	2	2	4	3	3	4	3	3	3	3	3	3	3	3	3	3	3	3	3	3	3	3	3	3	3	3
108	1	2	2	2	5	5	5	5	5	5	5	5	5	5	5	5	5	5	5	5	5	5	5	5	5	5	5
109	2	2	2	4	5	3	1	2	2	1	1	4	2	2	5	1	1	1	1	1	1	1	1	1	5	5	5
110	1	2	2	1	5	3	5	3	2	2	2	2	1	1	3	2	3	3	5	5	5	5	3	2	1	1	5
111	2	2	2	2	3	3	3	3	3	3	3	3	3	3	3	3	3	3	3	3	3	3	3	3	3	3	3
112	1	2	2	2	3	3	2	2	3	4	4	4	4	4	4	3	3	4	4	3	3	4	2	2	2	4	3
113	2	2	2	2	3	3	3	3	3	3	3	3	3	3	3	3	3	3	3	3	3	3	3	3	3	3	3
114	2	2	2	2	3	3	3	3	2	2	2	2	2	2	2	2	2	2	2	2	2	2	2	2	2	2	2
115	1	2	2	3	4	4	3	3	3	2	2	2	2	2	4	3	2	3	3	3	3	3	3	3	3	3	3
116	1	2	2	2	3	2	3	2	2	2	2	3	2	2	3	2	2	2	2	2	2	2	2	2	2	2	2
117	1	2	2	2	3	3	3	3	3	3	3	3	3	3	3	3	3	3	3	3	3	3	3	3	3	3	3
118	1	2	2	1	2	3	1	1	2	3	3	3	3	3	3	2	3	3	3	2	2	2	3	3	2	2	2
119	1	2	2	2	3	3	3	3	3	3	3	3	3	3	3	3	3	3	3	3	3	3	3	3	3	3	3
120	2	2	2	2	3	2	3	2	1	1	1	1	1	1	1	1	1	1	1	3	2	2	1	1	4	3	2
121	2	2	2	2	3	3	3	3	2	2	2	2	2	2	2	2	2	2	2	2	2	2	2	2	2	2	2
122	1	2	2	2	3	3	3	3	3	3	3	3	3	3	3	3	3	3	3	3	3	3	3	3	3	3	3
123	2	2	2	1	3	3	3	3	3	3	3	3	3	3	3	3	3	3	3	3	3	3	3	3	3	3	3
124	2	2	2	3	1	2	1	2	1	1	1	1	1	1	1	1	1	1	1	1	1	1	1	1	1	1	1
125	1	2	2	2	3	3	2	2	3	2	2	3	2	2	3	2	2	2	2	2	2	2	2	2	2	2	2
126	2	2	2	2	2	2	2	2	2	2	4	2	1	2	2	2	2	2	2	2	2	2	2	2	2	2	2
127	1	2	2	2	3	1	1	2	2	2	2	2	2	2	2	3	2	2	3	2	2	2	2	2	2	2	3
128	2	2	2	2	1	5	3	3	3	3	3	3	3	3	3	3	3	3	3	3	3	3	3	3	3	3	3
129	1	2	2	2	3	2	3	2	3	3	3	3	2	2	3	2	3	2	2	2	2	2	2	2	3	3	3
130	1	2	2	2	3	1	1	3	1	2	1	1	1	1	3	1	1	1	1	1	1	1	1	1	1	1	1
131	2	2	2	2	1	3	3	1	1	1	1	1	1	1	1	1	1	1	1	1	1	1	1	1	1	1	1
132	1	2	2	2	3	3	3	1	1	1	1	1	1	1	1	1	1	1	1	1	1	1	1	1	1	1	1
133	2	2	2	2	4	1	3	2	3	3	3	3	3	3	3	3	3	3	3	3	3	3	3	3	3	3	3
134	1	2	2	5	4	3	4	2	1	1	1	3	1	1	4	2	3	2	4	2	2	1	2	1	4	4	3
135	2	2	2	1	3	3	3	3	3	3	3	2	2	3	3	3	3	3	3	3	3	1	2	3	3	3	3
136	1	2	2	2	3	3	3	1	2	2	2	3	2	2	2	2	2	2	2	2	2	2	2	2	2	2	2
137	1	2	2	5	3	3	2	2	3	3	4	4	5	2	2	2	2	2	3	3	2	3	2	2	3	3	1
138	1	2	2	2	3	3	3	3	3	3	3	3	3	3	3	3	3	3	3	3	3	3	3	3	3	3	3
139	1	2	2	2	2	2	2	2	3	2	2	2	3	2	2	2	2	2	2	2	2	1	2	3	2	2	2
140	2	2	2	5	4	3	3	1	1	1	1	1	1	1	1	1	1	3	3	3	3	3	3	2	4	4	3
141	1	2	2	2	3	3	3	3	3	3	3	3	3	3	3	3	3	3	3	3	3	3	3	3	3	3	3
142	2	2	2	1	3	3	3	3	3	3	3	3	3	3	3	3	3	3	3	3	3	3	3	3	3	3	3
143	1	2	2	1	2	1	1	1	1	1	1	1	1	1	1	1	1	1	1	1	1	1	1	1	1	1	1
144	2	2	2	3	3	3	2	3	1	2	2	2	2	2	2	2	2	2	2	2	2	2	2	1	1	1	1
145	1	2	2	1	1	1	1	1	1	1	1	4	1	1	4	3	2	1	2	1	1	1	1	4	4	1	1
146	2	2	2	2	3	3	3	3	3	3	3	3	3	3	3	3	3	3	3	3	3	3	3	3	3	3	3
147	1	2	2	3	5	5	5	5	1	4	3	3	3	3	3	3	3	3	3	4	4	3	4	4	2	1	1
148	1	2	2	1	1	1	1	2	3	3	1	3	1	2	2	1	1	1	1	1	1	1	1	1	1	1	1
149	1	2	2	5	3	3	3	3	3	3	3	3	3	3	3	3	3	3	3	3	3	3	3	3	3	3	3
150	2	2	2	2	2	3	3	2	3	2	2	2	2	2	2	2	2	2	3	2	2	2	2	2	2	2	2
151	2	2	2	1	3	3	3	3	3	3	3	3	3	3	3	3	3	3	3	3	3	3	3	3	3	3	3
152	1	2	2	5	3	3	3	3	3	3	3	3	3	3	3	3	3	3	3	3	3	3	3	3	3	3	3
153	2	2	2	1	3	3	3	3	3	3	3	3	3	3	3	3	3	3	3	3	3	3	3	3	4	3	3
154	2	2	2	5	3	3	3	3	3	3	3	3	3	3	1	3	1	3	3	3	3	3	3	3	3	3	3
155	2	2	2	5	3	3	3	3	3	3	3	3	3	3	3	3	3	3	3	3	3	3	3	3	3	3	3
156	1	2	2	1	1	1	1	1	1	1	1	1	1	1	1	1	1	1	1	1	1	1	1	1	1	1	1
157	2	2	2	3	3	3	3	2	1	1	1	1	1	1	1	1	1	1	1	1	1	1	1	1	1	1	1
158	1	2	2	1	5	3	3	3	3	3	1	1	1	1	1	3	1	3	3	3	3	1	1	3	3	3	3
159	1	2	2	1	2	1	1	2	2	2	2	3	1	1	4	2	2	2	3	2	3	3	2	2	5	4	3
160	2	2	2	2	1	2	2	2	2	1	1	1	1	1	1	1	1	3	1	1	1	1	1	1	1	2	1
161	2	2	2	2	3	3	3	3	3	2	2	2	1	2	4	3	3	3	3	2	3	3	4	4	5	5	4
162	1	2	2	2	3	3	3	3	3	3	3	3	3	3	3	3	3	3	3	3	3	3	3	3	3	3	3
163	2	2	2	2	1	1	1	1	1	1	1	1	1	1	1	1	1	1	3	1	1	1	1	1	3	3	3
164	2	2	2	2	3	3	3	3	3	3	3	1	1	1	3	3	3	3	3	3	3	3	3	3	3	3	3
165	1	2	2	2	3	3	3	3	3	3	3	3	3	3	3	3	3	3	3	3	3	3	3	3	3	3	3
166	2	2	2	2	3	3	3	3	3	3	3	3	3	3	3	3	3	3	3	3	3	3	3	3	3	3	3
167	2	2	2	2	3	3	3	3	3	3	3	3	3	3	3	3	3	3	3	3	3	3	3	3	3	3	3
168	2	2	2	2	5	1	3	1	1	1	1	3	1	1	2	2	2	2	2	2	2	2	2	2	5	2	3
169	1	2	2	1	3	4	4	2	3	3	4	5	2	4	4	3	4	2	3	2	4	2	4	3	4	4	4
170	2	2	2	2	2	1	1	1	1	1	1	1	1	1	1	1	1	1	1	1	1	1	1	1	1	1	1
171	2	2	2	2	1	2	5	3	1	1	1	1	1	1	5	1	1	1	1	1	1	1	3	3	3	3	3
172	1	2	2	4	3	3	3	3	3	3	3	3	3	3	3	3	3	3	3	3	3	3	3	3	3	3	3
173	2	2	2	5	3	3	3	3	3	3	3	3	3	3	3	3	3	3	3	3	3	3	3	3	3	3	3
174	1	2	2	2	3	3	3	3	3	3	3	3	3	3	3	3	3	3	3	3	3	3	3	3	3	3	3
175	1	2	2	2	3	1	1	3	3	1	1	1	1	1	3	1	1	1	1	1	1	1	1	1	1	1	1
176	2	2	2	2	3	4	3	3	3	3	3	3	2	3	2	3	3	4	4	3	3	3	3	3	3	3	3
177	1	2	2	5	3	3	3	3	3	3	3	3	3	3	3	3	3	3	3	3	3	3	3	3	3	3	3
178	1	2	2	5	2	2	2	1	1	1	1	2	1	1	1	1	1	1	1	2	2	1	1	1	1	1	1
179	2	2	2	5	3	3	3	3	3	3	3	3	3	3	3	3	3	3	3	2	2	2	3	2	2	3	3
180	1	2	2	1	3	3	3	3	4	3	3	3	3	2	3	3	3	3	3	2	2	4	3	4	3	3	3
181	2	2	2	2	3	3	3	3	3	3	3	3	3	3	3	3	3	3	3	3	3	3	3	3	3	3	3
182	2	2	2	4	3	3	3	2	3	2	2	3	3	3	4	3	3	4	3	3	3	3	3	3	4	4	3
183	2	2	2	2	3	1	1	1	1	1	1	1	1	1	3	1	1	1	1	1	1	1	1	1	1	1	1
184	1	2	2	2	2	1	1	1	1	1	1	1	1	1	1	1	1	1	1	1	1	1	1	1	3	1	1
185	1	2	2	1	3	3	3	3	3	3	3	3	3	3	3	3	3	3	3	3	3	3	3	3	3	3	3
186	1	2	2	1	1	1	1	1	1	1	1	1	1	1	1	1	1	1	1	1	1	1	1	1	1	1	1
187	2	2	2	2	4	3	3	2	2	4	2	3	2	3	2	2	3	3	3	2	2	3	3	3	3	2	2
188	2	2	2	1	3	3	3	4	3	3	3	4	3	4	5	4	4	4	3	4	3	3	4	3	5	3	4
189	2	2	2	2	3	3	3	3	3	3	3	3	3	3	3	3	3	3	3	3	3	3	3	3	3	3	3
190	1	2	2	2	3	3	3	4	3	3	3	3	3	3	3	3	3	3	3	3	3	3	3	3	3	3	3
191	2	2	2	2	3	3	3	3	3	3	3	3	3	3	3	3	3	3	3	3	3	3	3	3	3	3	3
192	2	2	2	4	3	3	3	3	4	3	3	3	3	3	3	5	3	3	3	5	3	3	3	3	3	3	3
193	2	2	2	2	3	3	3	1	2	1	1	1	1	1	1	1	1	1	1	1	1	1	1	1	1	1	1
194	1	2	2	5	5	5	5	5	5	5	5	5	5	5	5	5	5	5	5	5	5	5	5	5	5	5	5
195	2	2	2	2	2	3	3	3	4	3	2	3	3	2	4	3	2	3	3	3	2	3	3	2	3	3	3
196	2	2	2	2	3	2	1	1	1	1	1	1	1	1	1	5	1	3	5	1	3	1	3	2	5	1	3
197	1	2	2	4	1	1	1	1	1	1	1	1	1	1	1	1	1	1	1	1	1	1	1	1	1	1	1
198	2	2	2	2	3	3	3	1	4	3	2	2	2	2	3	2	3	3	2	2	2	2	2	2	3	3	3
199	1	2	2	2	3	3	3	3	3	3	3	3	3	3	3	3	3	3	3	3	3	3	3	3	3	3	3
200	1	2	2	2	3	3	2	4	5	5	4	4	4	4	3	4	4	3	4	4	4	4	3	3	3	2	3
201	2	2	2	1	3	1	1	1	1	1	1	1	1	1	3	1	1	1	1	1	1	1	1	1	3	3	3
202	2	2	2	2	1	3	1	2	2	1	1	2	1	1	1	1	1	1	1	1	1	1	1	1	1	1	1
203	1	2	2	2	2	1	1	1	1	1	1	1	1	1	1	1	1	1	1	3	1	1	2	1	1	1	1
204	1	2	2	2	5	3	3	3	3	3	3	3	3	3	3	3	3	3	3	3	3	3	3	3	3	3	3
205	2	2	2	2	3	2	3	1	3	1	2	3	1	1	1	1	1	3	3	1	3	3	3	3	3	3	3
206	2	2	2	2	3	4	4	4	3	3	3	3	3	2	3	3	3	3	3	3	3	3	3	3	3	3	2
207	2	2	2	5	3	2	3	3	3	3	3	3	3	3	3	3	3	3	3	3	3	3	3	3	3	3	3
208	1	2	2	2	4	3	4	2	2	2	2	1	1	1	4	1	1	2	3	2	2	2	2	2	3	2	2
209	1	2	2	2	4	3	4	3	4	3	4	4	3	3	3	4	4	3	3	3	4	4	4	4	4	3	3
210	1	2	2	1	3	3	3	3	3	3	3	3	3	3	3	3	3	3	3	3	3	3	3	3	3	3	3
211	1	2	2	2	3	3	3	2	2	3	3	3	3	2	3	2	2	2	2	3	3	3	2	3	3	3	2
212	2	2	2	2	3	1	2	2	3	2	2	2	2	2	2	2	2	2	2	2	2	2	2	2	2	2	2
213	2	2	2	1	3	2	5	3	3	3	3	3	3	3	4	4	4	3	4	5	3	3	3	3	3	3	3
214	2	2	2	1	3	3	3	3	3	3	3	3	3	3	3	3	3	3	3	3	3	3	3	3	3	3	3
215	1	2	2	5	3	3	4	1	3	1	1	2	1	1	1	1	1	2	3	1	1	1	1	1	1	3	1
216	1	2	2	4	3	5	3	3	3	3	3	3	3	3	3	3	3	3	3	3	3	3	3	3	3	3	3
217	1	2	2	3	1	1	3	3	3	3	3	3	3	3	4	3	3	2	3	3	2	2	3	2	2	3	3
218	1	2	2	5	3	3	3	2	2	2	2	2	2	2	2	2	1	2	3	2	2	2	2	3	2	2	2
219	2	2	2	2	3	3	3	3	3	3	3	3	3	3	3	3	3	3	3	3	3	3	3	3	3	3	3
220	2	2	2	2	3	3	3	3	3	3	3	3	3	3	3	3	3	3	3	3	3	3	3	3	3	3	3
221	2	2	2	3	3	3	3	5	5	5	4	4	5	5	5	5	5	5	5	5	5	5	3	4	5	5	5
222	2	2	2	2	3	3	3	3	3	3	3	3	3	3	3	3	3	3	3	3	3	3	3	3	3	3	3
223	1	2	2	1	1	3	3	1	1	1	1	1	1	1	1	1	1	1	1	1	1	1	1	1	1	1	1
224	2	2	2	1	1	1	1	1	1	1	1	1	1	1	1	1	1	1	1	1	1	1	1	1	1	1	1
225	2	2	2	2	3	3	3	3	2	1	1	3	1	3	4	3	3	2	3	3	2	2	3	3	3	3	3
226	1	2	2	4	4	3	3	2	4	2	2	4	2	1	3	2	1	2	4	4	4	3	3	2	4	4	2
227	2	2	2	1	1	1	1	1	1	1	1	1	1	1	1	1	1	1	1	1	1	1	1	1	1	1	1
228	2	2	2	4	4	4	3	3	3	3	3	4	3	3	4	2	3	1	1	1	2	1	2	3	2	2	3
229	2	2	2	2	4	3	2	2	2	2	2	2	2	2	2	2	2	2	2	2	2	2	2	2	2	2	2
230	1	2	2	5	3	2	3	2	2	1	2	2	2	2	4	2	3	2	3	2	3	2	4	3	4	4	2
231	1	2	2	2	3	3	3	3	3	3	3	3	3	3	3	3	3	3	3	3	3	3	3	3	3	3	3
232	2	2	2	3	3	3	3	3	3	3	3	3	3	3	3	3	3	3	3	3	3	3	3	3	3	3	3
233	1	2	2	4	3	3	3	3	3	3	3	3	3	3	3	3	3	3	3	3	3	3	3	3	3	3	3
234	1	2	2	5	5	5	5	5	5	5	5	5	5	5	5	5	5	5	5	5	5	5	5	5	5	5	5
235	2	2	2	1	3	3	3	3	3	3	3	3	3	3	3	3	3	3	3	3	3	3	3	3	3	3	3
236	2	2	2	2	5	3	2	2	1	1	2	2	2	2	2	2	2	2	2	2	1	1	1	1	1	1	1
237	2	2	2	2	3	3	3	3	3	3	3	3	3	4	3	3	3	3	3	3	3	1	3	3	3	1	1
238	2	2	2	2	1	1	1	1	1	1	1	1	1	1	1	1	1	1	1	1	1	1	1	1	1	1	1
239	1	2	2	3	3	3	3	3	3	3	3	3	3	3	3	3	3	3	3	3	3	3	3	3	3	3	3
240	2	2	2	2	2	2	1	1	2	3	2	2	2	2	2	2	2	1	1	1	1	1	1	1	1	1	1
241	2	2	2	3	1	1	4	2	2	1	1	1	1	1	1	1	2	1	1	1	1	2	1	1	3	1	3
242	1	2	2	5	4	3	3	3	3	3	3	4	3	3	3	3	2	2	2	2	3	2	2	2	3	3	3
243	2	2	2	2	3	2	2	1	2	1	2	2	1	1	1	2	1	1	2	1	1	1	2	1	1	2	1
244	1	2	2	4	3	3	3	3	3	3	3	3	3	3	3	3	3	3	3	3	3	3	3	3	3	3	3
245	2	2	2	2	3	3	3	3	3	3	3	3	3	3	3	3	3	3	3	3	3	3	3	3	3	3	3
246	2	2	2	4	3	3	3	3	3	3	3	3	3	3	3	3	3	3	3	3	3	3	3	3	3	3	3
247	1	2	2	3	3	3	3	3	3	3	3	3	3	3	3	3	3	3	3	3	3	3	3	3	3	3	3
248	2	2	2	1	3	1	1	2	1	1	1	2	1	1	1	1	1	1	1	1	1	1	1	1	1	1	1
249	2	2	2	2	3	3	3	3	3	3	3	3	3	3	3	3	3	3	3	3	3	3	3	3	3	3	3
250	1	2	2	1	3	3	3	3	3	3	3	3	3	3	3	3	3	3	3	3	3	3	3	3	3	3	3
251	1	2	2	5	3	3	3	3	3	3	3	3	3	3	3	3	3	3	3	3	3	3	3	3	3	3	3
252	1	2	2	2	5	3	1	1	2	1	1	2	1	1	1	1	1	1	1	2	2	2	2	1	2	2	1
253	1	2	2	1	3	3	3	3	3	3	3	3	3	3	3	3	3	3	3	3	3	3	3	3	3	3	3
254	1	2	2	5	3	3	3	3	3	3	3	3	3	3	3	3	3	3	3	3	3	3	3	3	3	3	3
255	1	2	2	5	5	5	5	5	5	5	5	5	1	1	1	1	1	5	1	5	5	5	5	5	5	5	5
256	2	2	2	2	2	2	2	2	2	2	2	2	2	2	2	2	1	2	2	2	2	2	2	2	2	2	2
257	1	2	2	5	1	1	3	3	3	2	2	3	2	2	4	3	3	2	3	2	2	2	2	2	3	3	2
258	2	2	2	2	1	1	1	1	2	3	3	3	3	3	3	3	3	2	1	1	1	1	3	3	3	3	2
259	2	2	2	3	3	1	2	2	2	2	2	2	2	2	2	2	2	2	2	2	2	2	2	2	2	2	2
260	1	2	2	2	1	1	1	1	1	1	1	1	1	1	1	1	1	1	1	1	1	1	1	1	1	1	1
261	2	2	2	3	3	3	3	5	5	4	4	4	3	4	3	3	3	3	3	3	3	3	3	3	3	3	3
262	1	2	2	1	3	3	3	3	1	1	1	3	1	1	3	1	1	3	3	3	3	3	3	3	3	3	1
263	1	2	2	2	3	3	3	3	3	3	3	3	3	3	3	3	3	3	3	3	3	3	3	3	3	3	3
264	2	2	2	2	3	3	3	3	3	3	3	3	3	3	3	3	3	3	3	3	3	3	3	3	3	3	3
265	1	2	2	1	1	1	3	1	1	1	1	1	1	1	3	1	1	2	1	1	1	1	1	1	1	1	1
266	1	2	2	1	3	3	3	3	3	3	3	3	3	3	3	3	3	3	3	3	3	3	3	3	3	3	3
267	1	2	2	1	3	3	3	3	3	3	3	3	3	3	3	3	3	3	3	3	3	3	3	3	3	3	3
268	2	2	2	2	3	3	3	2	1	1	1	1	1	1	1	1	1	1	1	1	1	1	1	1	3	1	2
269	1	2	2	1	3	3	3	3	3	3	3	3	3	3	3	3	3	3	3	3	3	3	3	3	3	3	3
270	2	2	2	1	3	3	4	5	5	5	5	4	2	4	5	5	5	4	5	5	5	5	5	4	5	5	1
271	2	2	2	2	3	3	3	2	2	2	2	2	2	1	3	2	2	2	2	2	1	1	1	2	1	2	1
272	1	2	2	2	3	2	3	3	3	2	2	3	3	3	3	3	3	2	2	2	2	3	3	3	3	2	2
273	2	2	2	1	3	3	3	3	3	3	3	3	3	3	3	3	4	3	3	3	3	3	3	3	3	3	3
274	1	2	2	1	2	2	1	2	2	2	2	3	3	4	2	2	2	3	1	2	2	3	3	3	3	3	3
275	2	2	2	3	3	3	3	3	3	3	3	3	3	3	3	3	3	3	3	3	3	3	3	3	3	3	3
276	2	2	2	1	2	2	2	2	3	2	2	3	1	1	1	2	1	1	2	2	2	1	1	2	1	2	1
277	1	2	2	2	3	3	4	2	5	3	3	3	3	4	2	3	2	3	3	3	3	3	3	3	2	3	2
278	2	2	2	5	3	3	3	5	3	1	5	3	2	3	3	3	3	3	3	3	4	3	4	3	3	3	3
279	2	2	2	4	3	3	2	4	4	4	4	3	4	3	3	3	3	3	3	3	3	3	3	3	2	2	3
280	1	2	2	5	3	3	3	3	3	3	3	3	3	3	3	3	3	3	3	3	3	3	3	3	3	3	3
281	2	2	2	2	3	3	3	3	3	3	3	3	3	3	3	3	3	3	3	3	3	3	3	3	3	3	3
282	1	2	2	2	3	3	3	3	3	3	3	3	3	3	3	3	3	3	3	3	3	3	3	3	3	3	3
283	1	2	2	2	3	3	3	3	3	2	2	2	2	2	2	2	2	2	2	2	2	2	2	2	2	2	2
284	2	2	2	2	1	1	1	1	1	1	1	1	1	1	1	1	1	3	3	3	3	2	4	3	5	3	3
285	1	2	2	2	2	1	1	1	3	2	2	3	2	1	3	2	2	2	3	2	1	2	2	3	2	2	2
286	1	2	2	2	3	1	2	1	1	1	1	1	1	1	1	1	1	1	1	1	1	1	1	1	1	3	3
287	2	2	2	2	3	1	1	3	5	4	5	3	2	3	4	3	4	2	2	3	2	2	4	2	5	1	3
288	2	2	2	4	3	2	3	2	2	3	3	3	3	3	3	3	3	3	3	3	3	3	3	3	3	3	3
289	1	2	2	4	3	3	3	3	3	3	3	3	3	3	3	3	3	3	3	3	3	3	3	3	3	3	3
290	2	2	2	3	4	3	3	2	2	1	1	1	1	1	1	1	1	1	4	2	5	2	1	3	1	1	4
291	1	2	2	1	3	3	3	3	3	3	3	3	3	3	3	3	3	3	3	3	3	3	3	3	3	3	3
292	1	2	2	2	3	2	3	2	2	2	2	2	2	2	2	2	2	2	2	2	2	2	2	2	3	2	2
293	1	2	2	2	3	5	5	5	3	3	3	3	3	3	3	3	3	3	3	3	3	3	3	3	3	3	3
294	2	2	2	4	3	3	2	4	3	1	2	2	2	2	2	2	3	2	2	2	2	2	3	2	2	2	2
295	1	2	2	1	3	2	5	4	5	3	4	5	2	3	4	2	2	2	2	2	2	2	2	2	2	3	3
296	2	2	2	2	1	1	1	1	1	1	1	1	1	1	1	1	1	1	1	1	1	1	1	1	1	1	1

## Sheet: fsQCA
2	0	0.25	0.5	0.5	0.5	0.5	0.5	0.5	0.5	0.75	0.25	0	0.5	0.5	0.5	0.5	0.5	0.5	0.5	0.5	0.5	0.5	0.5	0.5	0.5
2	0	0	0.5	0.5	0.5	0.5	0.5	0.5	0.5	0.5	0.5	0.5	0.5	0.5	0.5	0.5	0.5	0.5	0.5	0.5	0.5	0.5	0.5	0.5	0.5
2	0	0.25	0.5	0.5	0.5	0.5	0.5	0.5	0.5	0.5	0.5	0.5	0.5	0.5	0.5	0.5	0.5	0.5	0.5	0.5	0.5	0.5	0.5	0.5	0.5
2	0	0	0.5	0.5	0.5	0.5	0.5	0.5	0.5	0.5	0.25	0.25	0.5	0.25	0.25	0.75	0.5	0.25	0.25	0.25	0.25	0.25	0.25	0.25	0.25
2	0	0.25	0.5	0	0	0	0.5	0	0	0.5	0	0.5	0.5	0	0.5	0.5	0.5	0.5	0.5	0.5	0.5	0.5	0	0.5	0.5
2	0	0	0.5	0.5	0.5	0.5	0.5	0.5	0.25	0.25	0.5	0.5	0.5	0.5	0.5	0.5	0.5	0.5	0.5	0.5	0.5	0.25	0.25	0.5	0.25
2	0	0	0.5	0	0	0	0	0	0	0.5	0	0	0.5	0	0	0	0	0	0	0	0	0	0	0	0
2	0	0.25	0.5	0.5	0.5	0.5	0.5	0.5	0	5	0	0	0.5	0	0.5	0	0.5	0.5	0.5	0.5	0.5	0.5	0.5	0.5	0.5
2	0	0	0.75	0.5	0.25	0	0.25	0	0	0	0	0	0.25	0.5	0.5	0.25	0.5	0.5	0.5	0.5	0.25	0.25	0.25	0.25	0.5
2	0	0.25	0.5	0	0.25	0	0.25	0	0	0.25	0	0	0	0	0	0	0.25	0	0.25	0.25	0	0.25	0.25	0	0.5
2	0	0.25	0.5	0	0	0.5	0.5	0.75	0.5	5	0	0	0.75	0.5	0.5	0.5	0.5	0.5	0.5	0.5	0.5	0	0	0.5	0.5
2	0	0.25	0.5	0.5	0.5	0.5	0.5	0.5	0.25	0.75	0.25	0.25	1	0.25	0.5	0	0	0.75	0.5	0.5	0	0.5	0.5	0.5	0.5
2	0	0.25	0.25	0.25	0.25	0.25	0.25	0.25	0.25	0.25	0.25	0.25	0.25	0.25	0.25	0.25	0.25	0.25	0.25	0.25	0.25	0.25	0.25	0.25	0.25
2	0	0.25	0.5	0.5	0.5	0.5	0.5	0.5	0.25	0.5	0.25	0.5	0.75	0.5	0.5	0.25	0.25	0.25	0.25	0.25	0.25	0.5	0.5	0.5	0.5
2	0	0.25	0.5	0	0.25	0	0	0	0	0	0	0	0	0	0.25	0.25	0.25	0.25	0.25	0	0	0	0	0	0
1	0	0	0.5	0.5	0.5	0.5	0.5	0.5	0.5	0.5	0.5	0.5	0.5	0.5	0.5	0.5	0.5	0.5	0.5	0.5	0.5	0.5	0.5	0.5	0.5
2	0	0.25	0.5	0.5	0.5	0.25	0.5	0	0	0	0	0	0	0	0	0	0	0	0	0	0	0	0.5	0	0.5
2	0	0.25	0.5	0.5	0.5	0.5	0.5	0.5	0.5	0.5	0.5	0.5	0.5	0.5	0.5	0.5	0.5	0.5	0.5	0.5	0.5	0.5	0.5	0.5	0.5
2	0	0.25	0.5	0.5	0.5	0	0.5	0	0	0.5	0	0	0.5	0	0	0	0	0	0	0	0	0	0.5	0	0
2	0	0	0.5	0.5	0.25	0.25	0.25	0.25	0	0.5	0.25	0.25	0.75	0.25	0.25	0.25	0.25	0.25	0.25	0.25	0.25	0.25	0.25	0.25	0.25
2	0	0.25	0.5	0	0.5	0.5	0.5	0.5	0.5	5	0.5	0.5	0.5	0.5	0.5	0.25	0.5	0	0	0.5	0.25	0.75	0.75	0.75	0.75
2	0	0.25	0.5	0	0.5	0	0.5	0.25	0.25	0.75	0	0.5	1	0.5	0.25	0.5	0.5	0	0	0	0	0.25	0.5	0.75	0.5
2	0	0.25	0.5	0	0.5	0.5	0.5	0	0	0.5	0.25	0.25	0.5	0.5	0.25	0.5	0.5	0.5	0.5	0.5	0.5	0.5	0.5	0.5	0.5
2	0	0.25	0.5	0	0	0	0	0	0	0	0	0	0	0	0	0	0	0	0	0	0	0	0	0	0
2	0	0	0.5	0	0	0	0	0	0	0	0	0	0	0	0	0	0	0	0	0	0	0	0	0	0
2	0	0.25	0.5	0	0	0	0.75	0.25	0	0.5	0	0	0	0	0	0.25	0.25	0.25	0	0	0.25	0.5	0.5	0.5	0.5
2	0	0.25	0.5	0.5	0.5	0.5	0.5	0.5	0.5	0.5	0.5	0.5	0.5	0.5	0.5	0.5	0.5	0.5	0.5	0.5	0.5	0.5	0.5	0.5	0.5
1	0	0	0.5	0.5	0.5	0.5	0.5	0.5	0.5	0.5	0.5	0.5	0.5	0.5	0.5	0.5	0.5	0.5	0.5	0.5	0.5	0.5	0.5	0.5	0.5
2	0	1	0	0	0	0	0	0	0	0	0	0	0	0	0	0	0	0	0	0	0	0	0	0	0
2	0	0.5	0	0	0	0	0	0	0	0	0	0	0	0	0	0	0	0	0	0	0	0	0	0	0
2	0	1	0	0	0	0	0	0	0	0	0	0	0	0	0	0	0	0	0	0	0	0	0	0	0
2	0	0.75	0.5	0.5	0.5	0.5	0.75	0.25	0.5	0.75	0.25	0.25	0.25	0.25	0.25	0.5	0.5	0.5	0.25	0.25	0.25	0.5	0.75	0.75	0.5
1	0	1	0	0	0.5	0	0	0	0	0.5	0	0	0	0	0	0	0	0	0.5	0.5	0.5	0.5	0.5	0	0.5
2	0	0.25	0.5	0.5	0.5	0.5	0.5	0.5	0.5	0.5	0.5	0.5	0.5	0.5	0.5	0.5	0.5	0.5	0.5	0.5	0.5	0.5	0.5	0.5	0.5
1	0	0.25	0	0	0	0	0	0	0	0	0	0	0	0	0	0	0	0	0	0	0	0	0	0	0
2	0	0.25	0.5	0.5	0.5	0.5	0.5	0.5	0.5	0.5	0.5	0.5	0.5	0.5	0.5	0.5	0.5	0.5	0.5	0.5	0.5	0.5	0.5	0.5	0.5
2	0	1	0	0	0.5	0	0.5	0.5	0.5	0	0	0	0	0	0	0	0	0	0	0	0	0	1	0	0.5
2	0	0.5	0.5	0.5	0.5	0.5	0.5	0.5	0.5	0.5	0.5	0.5	0.5	0.5	0.5	0.5	0.5	0.5	0.5	0.5	0.5	0.5	0.5	0.5	0.75
2	0	0.5	0.5	0.5	0.5	0.5	0.5	0.5	0.5	0.5	0.5	0.5	0.5	0.5	0.5	0.5	0.5	0.5	0.5	0.5	0.5	0.5	0.5	0.5	0.5
1	0	0.25	0.5	0	0.5	0.5	0.5	0	0	0	0	0	0.5	0.5	0.5	0.5	0.5	0.5	0.5	0.5	0.5	0.5	0.5	0.75	0.5
2	0	0.25	0.5	0.5	0.5	0.5	0.5	0.5	0.5	0.5	0.5	0.5	0.5	0.5	0.5	0.5	0.5	0.5	0.5	0.5	0.5	0.5	0.5	0.5	0.5
2	0	0.25	0.5	0.5	0.5	0.75	0.5	0.5	0.5	0.5	0.5	0.5	0.5	0.5	0.5	0.5	0.5	0.5	0.5	0.5	0.75	0.5	0.75	0.75	0.5
2	0	0.25	0.5	0.5	0.5	0	0	0	0	0	0	0	0	0	0	0.5	0.5	0.5	0.5	0.5	0.5	0	0.25	0.5	0.5
2	0	0.25	0.5	0.5	0.5	0.5	0.5	0.5	0.5	0.5	0	0.5	0.5	0.5	0.5	0.5	0.75	0.5	0.5	0.5	0.5	0.5	0.5	0.5	0.5
2	0	0	0.5	0.5	0.5	0.5	0.5	0.5	0.5	0.5	0.5	0.5	0.5	0.5	0.5	0.5	0.5	0.5	0.5	0.5	0.5	0.5	0.5	0.5	0.5
2	0	0.25	0.5	0.25	0.5	0.5	5	0	0	0.75	0.5	0.5	0.5	0.5	0.5	0.5	0.5	0.5	0.5	0.5	0.25	0.5	1	1	5
2	0	0.25	0.5	0.5	0.25	0.25	0.75	0.5	0.5	0.75	0.25	0.5	0.75	0.5	0.25	0.25	0.5	0.5	0.5	0.5	0.25	0.5	0.5	0.75	0.75
1	0	0.25	0.5	0.5	0.25	0.25	0.25	0.5	0.5	0.75	0.5	0.5	0.5	0.5	0.25	0.5	0.75	0.5	0.5	0.5	0.5	0.5	0.5	0.5	0.5
2	0	0.25	0.5	0.5	0.5	0.5	0.5	0.5	0.5	0.5	0.5	0.5	0.5	0.5	0.5	0.5	0.5	0.5	0.5	0.5	0.5	0.5	0.5	0.5	0.5
2	0	1	0.25	0.25	0.25	0.25	0.5	0.5	0.25	0.5	0.25	0.25	0.75	0.5	0.5	0.5	0.5	0.5	0.5	0.5	0.5	0.5	0.75	0.75	0.5
2	0	0.25	0.25	0.25	0.25	0.25	0.25	0.25	0.5	0.5	0.5	0.5	0.5	0.5	0.5	0.5	0.5	0.5	0.5	0.5	0.5	0.5	0.5	0.5	0.5
2	0	0.25	0.5	0.25	0.25	0.5	0.5	0.5	0.5	0.5	0.5	0.5	0.25	0.5	0.5	0.5	0.5	0.5	0.5	0.5	0.5	0.5	0.5	0.5	0.5
2	0	0.25	0	0	0	0	0	0	0	0	0	0	0	0	0	0	0	0	0	0	0	0	0	0	0
1	0	0.25	0.5	0.25	0.25	0.25	0.25	0	0	0.25	0.25	0.25	0.25	0.25	0.25	0.25	0.25	0.25	0.25	0.25	0.25	0.25	0.25	0.25	0.25
1	0	0.25	0.5	0	0.5	0	0	0	0	0.5	0	0	0.5	0	0.25	0	0	0	0.25	0.25	0	0	0.75	0	0.5
2	0	0.25	0	0	0.5	0	0.5	0.5	0.5	5	0	0.5	0.5	0.5	0	0	0	0	0	0	0	0.5	0	0	0
1	0	0.25	0.25	0	0	0.5	0.5	0.5	0.5	0.5	0.5	0.5	0.5	0.5	0.5	0.5	0.5	0.5	0.5	0.5	0.5	0.5	0.5	0.5	0.5
2	0	0.25	0.5	0.5	0.5	0.5	0.5	0.5	0.5	0.5	0.5	0.5	0.5	0.5	0.5	0.5	0.5	0.5	0.5	0.5	0.5	0.5	0.5	0.5	0.5
2	0	0.25	0.5	0.5	0.25	0.5	0.5	0.5	0.5	0.5	0.5	0.5	0.5	0.5	0.5	0.5	0.5	0.5	0.5	0.5	0.5	0.5	0.5	0.5	0.5
2	0	0	0	0	0	0	0	0	0	0	0	0	0	0	0	0	0	0	0	0	0	0	0	0	0
1	0	0.25	0.75	0.25	0.25	0	0.5	0.5	0.5	0.25	0.25	0.25	0.25	0.25	0.25	0.25	0.25	0.25	0.25	0.25	0.5	0.25	0.25	0.25	0.25
1	0	0	0.5	0.25	0.5	0	0	0	0	0	0	0	0	0	0	0	0	0	0	0	0	0	0.75	0	0
2	0	0.25	0.5	0.5	0.5	0.25	0.75	0.5	0.25	0.75	0.5	0.75	0.75	0.5	0.75	0.5	0.5	0.25	0.25	0.25	0.5	0.75	0.75	0.75	0.5
2	0	0.25	0.5	0.75	0.75	0.5	0.25	0.5	0.25	0.75	0.5	0.25	0.75	0.25	0.75	0.25	0.25	0.25	0.25	0.25	0.25	0.25	0.25	0.75	0.25
2	0	0.25	0.5	0	0.75	0	0.5	0.75	0.25	0.75	0.25	0.75	0.75	0.5	0.25	0.5	0.5	0.5	0.5	0.5	0.5	0.75	0.5	5	0.25
1	0	0	0.5	0	0.5	0.5	0.5	0.5	0.5	0.5	0.5	0.5	0.5	0.5	0.5	0.5	0.5	0.5	0.5	0.5	0.5	0.5	0.5	0.5	0.5
2	0	0	0.25	0	0	0	0	0	0	0	0	0	0	0	0	0	0	0	0	0	0	0	0	0	0
2	0	0.25	0.5	0.5	0.5	0.5	0.5	0.5	0.5	0.5	0.5	0.5	0.5	0.5	0.5	0.25	0.25	0.25	0.25	0.25	0.25	0.25	0.25	0.25	0.25
2	0	0.25	1	0.5	1	0.25	0.25	0.25	0.25	0.25	0.25	0.25	0.25	0	0	0	0	0	0	0	0	0	0	0	0
1	0	0.25	0.5	0.5	0	0	0	0.25	0.5	0.5	0.5	0.5	0.5	0.5	0.5	0.5	0.5	0.5	0.5	0	0	0	0.5	0.5	0.5
2	0	0.25	0.5	0	0.5	0.5	0.5	0.5	0.5	0.5	0.5	0.5	0.5	0.5	0.5	0.5	0.5	0.5	0.5	0.5	0.5	0.5	0.5	0.5	0.5
2	0	0	0.5	0.5	0.5	0	0	0	0	0	0	0	0	0	0	0	0	0	0	0	0	0	0	0	0
2	0	0.25	0.5	0.5	0.5	0.5	0.5	0.5	0.5	0.5	0.5	0.5	0.5	0.5	0.5	0.5	0.5	0.5	0.5	0.5	0.5	0.5	0.5	0.5	0.5
2	0	0.75	0.5	0.5	1	0.25	0.25	0	0	0	0	0	0.5	0	0.5	0.5	0.5	0.5	0.5	0	0.25	0	1	0.5	0.25
1	0	0.25	1	5	0.5	0.5	0.5	0.5	0.5	0.5	0.5	0.5	0.5	0.5	0.5	0.5	0.5	0.5	0.5	0.5	0.5	0.5	0.5	0.5	0.5
2	0	0.75	0.5	0.5	0.5	0.5	0.5	0.5	0.5	0.5	0.5	0.5	0.5	0.5	0.5	0.5	0.5	0.5	0.5	0.5	0.5	0.5	0.5	0.5	0.5
1	0	0	0.5	0.5	0.5	0.5	0.25	0	0.25	0.5	0.5	0.5	0.5	0.5	0.25	0.5	0.5	0.5	0.5	0.5	0.5	0.5	1	1	0.5
2	0	0.25	0.25	0.25	0	0.5	0.25	0.5	0.5	0	0.5	0.25	0.25	0.25	0.25	0.5	0.25	0.25	0.5	0.5	0.5	0.25	0.25	0.25	0.5
2	0	0.25	0.5	0	1	0	5	0	0.5	0.5	0	0	0.5	0.5	0	0	0	0.5	0.5	0	0.5	0.5	0.5	0.5	0.5
1	0	0.25	0.5	0.5	0.5	0.5	0.5	0.5	0.5	0.75	0.5	0.5	0.5	0.5	0.5	0.5	0.5	0.5	0.5	0.5	0.5	0.5	0.5	0.5	0.5
1	0	0	0	0	0	0	0	0	0	0	0	0	0	0	0	0	0	0	0	0	0	0	0.5	0.5	0.5
2	0	0.5	0	0	0	0	0	0	0	0.25	0	0	0	0	0	0	0	0	0	0	0	0	0	0	0
2	0	0.25	0	0	0.5	0.5	0.5	0.5	0.5	0.5	0.5	0.5	0.5	0.5	0.5	0.5	0.5	0.5	0.5	0.5	0.5	0.5	0.5	0.5	0.5
2	0	0.25	0.5	0	0	0.25	0.5	0	0	0	0	0	0.25	0	0	0	0	0	0	0	0	0	0	0	0
2	0	0.25	0.25	0.5	0.25	0	0	0	0	0	0	0	0	0	0	0	0	0	0	0	0.25	0.25	0.25	0	0
2	0	0.25	0.5	0.5	0.5	0.5	0.5	0.5	0.5	0.5	0.5	0.5	0.5	0.5	0.5	0.5	0.5	0.5	0.5	0.5	0.5	0.5	0.5	0.5	0.5
2	0	0.25	0	0	0	0	0	0	0	0	0	0	0	0	0	0	0	0	0	0	0	0	0	0	0
2	0	0.25	0.25	0	0	0	0	0	0	0	0	0	0	0	0	0	0	0	0	0	0	0	0	0	0
2	0	0	0.5	0.5	0	0	0	0	0	0	0	0	0	0	0	0	0	0	0	0	0	0	0	0	0
1	0	0.25	0.5	0	0.5	0	0.25	0	0	0	0	0	0	0	0	0	0	0	0	0	0	0	0	0	0
2	0	1	0.5	0.5	0.5	0.5	0.5	0.5	0.5	0.5	0.5	0.5	0.5	0.5	0.5	0.5	0.5	0.5	0.5	0.5	0.5	0.5	0.5	0.5	0.5
1	0	0.5	0.25	0.25	0	0	0.5	0	0	0	0	0	0	0.5	0	0	0	0.5	0	0	0	0	0	0	0
2	0	0.25	0.5	0.25	0.25	0.5	0.25	0.25	0.5	0.5	0.25	0	0	0.25	0.25	0.25	0.5	0.5	0.5	0.5	0.5	0.5	0.5	0.5	0.5
2	0	1	0.5	0.5	0.5	0.5	0.5	0.5	0.5	0.5	0.5	0.5	0.5	0.5	0.5	0.5	0.5	0.5	0.5	0.5	0.5	0.5	0.5	0.5	0.5
2	0	0.25	0	0	0	0.5	0.5	0.5	0.5	0.5	0.5	0.5	0.5	0.5	0.5	0.5	0.5	0.5	0.5	0.5	0.5	0.5	0.5	0.5	0.5
2	0	0.25	0.5	0.5	0.5	0.5	0.5	0.5	0.5	0.5	0.5	0.5	0.5	0.5	0.5	0.5	0.5	0.5	0.5	0.5	0.5	0.5	0.5	0.5	0.5
2	0	0.25	0.5	0.5	0.5	0.5	0.5	0.5	0.25	0.25	0	0	0	0	0.25	0.5	0.5	0.5	0.5	0.5	0.5	0.5	0.5	0.5	0.5
2	0	0	0	0	0	0	0	0	0	0	0	0	0	0	0	0	0	0	0	0	0	0	0	0	0
2	0	0.25	0.5	0.5	0.5	0.5	0.5	0.5	0.5	0.5	0.5	0.5	0.5	0.5	0.5	0.5	0.5	0.5	0.5	0.5	0.5	0.5	0.5	0.5	0.5
2	0	1	0.5	0.5	0.5	0.5	0.5	0.5	0.5	0.5	0.5	0.5	0.5	0.5	0.5	0.5	0.5	0.5	0.5	0.5	0.5	0.5	0.5	0.5	0.5
2	0	0.5	0.5	0.5	0.5	0.5	0.5	0.5	0.5	0.5	0.5	0.5	0.5	0.5	0.5	0.5	0.5	0.5	0.5	0.5	0.5	0.5	0.5	0.5	0.5
2	0.25	0.25	0.5	0.5	1	0	0	0	0	0	0	0	0	0	0	0	0	0	0	0.5	0	0	0	0	0
2	0	0	0.5	0.5	0.5	0.5	0.5	0.5	0.5	0.5	0.5	0.5	0.5	0.5	0.5	0.5	0.5	0.5	0.5	0.5	0.5	0.5	0.5	0.5	0.5
2	0	0	0.5	0	0.25	0	0.5	0.25	0	0.25	0	0	0.25	0	0	0.25	0	0.25	0.25	0.25	0	0.25	0.25	0.5	0.25
2	0.25	0.25	0.5	0.5	0.5	0.5	0.5	0.5	0.5	0.5	0.5	0.5	0.5	0.5	0.5	0.5	0.5	0.5	0.5	0.5	0.5	0.5	0.5	0.5	0.5
1	0	0.25	0.5	0.5	0.5	0.75	0.5	0.5	0.5	0.75	0.25	0.25	0.75	0.5	0.5	0.5	0.5	0.5	0.25	0.5	0.5	0.5	0.25	0.5	0.25
2	0	0.75	0.5	0.5	0.75	0.5	0.5	0.5	0.5	0.5	0.5	0.5	0.5	0.5	0.5	0.5	0.5	0.5	0.5	0.5	0.5	0.5	0.5	0.5	0.5
1	0	0.25	1	1	1	1	1	1	1	1	1	1	1	1	1	1	1	1	1	1	1	1	1	1	1
2	0.25	0.75	1	0.5	0	0.25	0.25	0	0	0.75	0.25	0.25	5	0	0	0	0	0	0	0	0	0	1	1	1
1	0	0	1	0.5	1	0.5	0.25	0.25	0.25	0.25	0	0	0.5	0.25	0.5	0.5	1	1	1	1	0.5	0.25	0	0	1
2	0.25	0.25	0.5	0.5	0.5	0.5	0.5	0.5	0.5	0.5	0.5	0.5	0.5	0.5	0.5	0.5	0.5	0.5	0.5	0.5	0.5	0.5	0.5	0.5	0.5
1	0	0.25	0.5	0.5	0.25	0.25	0.5	0.75	0.75	0.75	0.75	0.75	0.75	0.5	0.5	0.75	0.75	0.5	0.5	0.75	0.25	0.25	0.25	0.75	0.5
2	0	0.25	0.5	0.5	0.5	0.5	0.5	0.5	0.5	0.5	0.5	0.5	0.5	0.5	0.5	0.5	0.5	0.5	0.5	0.5	0.5	0.5	0.5	0.5	0.5
2	0	0.25	0.5	0.5	0.5	0.5	0.25	0.25	0.25	0.25	0.25	0.25	0.25	0.25	0.25	0.25	0.25	0.25	0.25	0.25	0.25	0.25	0.25	0.25	0.25
2	0	0.5	0.75	0.75	0.5	0.5	0.5	0.25	0.25	0.25	0.25	0.25	0.75	0.5	0.25	0.5	0.5	0.5	0.5	0.5	0.5	0.5	0.5	0.5	0.5
2	0	0.25	0.5	0.25	0.5	0.25	0.25	0.25	0.25	0.5	0.25	0.25	0.5	0.25	0.25	0.25	0.25	0.25	0.25	0.25	0.25	0.25	0.25	0.25	0.25
2	0	0.25	0.5	0.5	0.5	0.5	0.5	0.5	0.5	0.5	0.5	0.5	0.5	0.5	0.5	0.5	0.5	0.5	0.5	0.5	0.5	0.5	0.5	0.5	0.5
2	0.25	0	0.25	0.5	0	0	0.25	0.5	0.5	0.5	0.5	0.5	0.5	0.25	0.5	0.5	0.5	0.25	0.25	0.25	0.5	0.5	0.25	0.25	0.25
2	0	0.25	0.5	0.5	0.5	0.5	0.5	0.5	0.5	0.5	0.5	0.5	0.5	0.5	0.5	0.5	0.5	0.5	0.5	0.5	0.5	0.5	0.5	0.5	0.5
2	0.25	0.25	0.5	0.25	0.5	0.25	0	0	0	0	0	0	0	0	0	0	0	0.5	0.25	0.25	0	0	0.75	0.5	0.25
2	0	0.25	0.5	0.5	0.5	0.5	0.25	0.25	0.25	0.25	0.25	0.25	0.25	0.25	0.25	0.25	0.25	0.25	0.25	0.25	0.25	0.25	0.25	0.25	0.25
2	0	0.25	0.5	0.5	0.5	0.5	0.5	0.5	0.5	0.5	0.5	0.5	0.5	0.5	0.5	0.5	0.5	0.5	0.5	0.5	0.5	0.5	0.5	0.5	0.5
2	0	0	0.5	0.5	0.5	0.5	0.5	0.5	0.5	0.5	0.5	0.5	0.5	0.5	0.5	0.5	0.5	0.5	0.5	0.5	0.5	0.5	0.5	0.5	0.5
2	0	0.5	0	0.25	0	0.25	0	0	0	0	0	0	0	0	0	0	0	0	0	0	0	0	0	0	0
2	0	0.25	0.5	0.5	0.25	0.25	0.5	0.25	0.25	0.5	0.25	0.25	0.5	0.25	0.25	0.25	0.25	0.25	0.25	0.25	0.25	0.25	0.25	0.25	0.25
2	0	0.25	0.25	0.25	0.25	0.25	0.25	0.25	0.75	0.25	0	0.25	0.25	0.25	0.25	0.25	0.25	0.25	0.25	0.25	0.25	0.25	0.25	0.25	0.25
2	0	0.25	0.5	0	0	0.25	0.25	0.25	0.25	0.25	0.25	0.25	0.25	0.5	0.25	0.25	0.5	0.25	0.25	0.25	0.25	0.25	0.25	0.25	0.5
2	0	0.25	0	5	0.5	0.5	0.5	0.5	0.5	0.5	0.5	0.5	0.5	0.5	0.5	0.5	0.5	0.5	0.5	0.5	0.5	0.5	0.5	0.5	0.5
2	0	0.25	0.5	0.25	0.5	0.25	0.5	0.5	0.5	0.5	0.25	0.25	0.5	0.25	0.5	0.25	0.25	0.25	0.25	0.25	0.25	0.25	0.5	0.5	0.5
2	0	0.25	0.5	0	0	0.5	0	0.25	0	0	0	0	0.5	0	0	0	0	0	0	0	0	0	0	0	0
2	0	0.25	0	0.5	0.5	0	0	0	0	0	0	0	0	0	0	0	0	0	0	0	0	0	0	0	0
2	0	0.25	0.5	0.5	0.5	0	0	0	0	0	0	0	0	0	0	0	0	0	0	0	0	0	0	0	0
2	0	0.25	0.75	0	0.5	0.25	0.5	0.5	0.5	0.5	0.5	0.5	0.5	0.5	0.5	0.5	0.5	0.5	0.5	0.5	0.5	0.5	0.5	0.5	0.5
2	0	1	0.75	0.5	0.75	0.25	0	0	0	0.5	0	0	0.75	0.25	0.5	0.25	0.75	0.25	0.25	0	0.25	0	0.75	0.75	0.5
2	0	0	0.5	0.5	0.5	0.5	0.5	0.5	0.5	0.25	0.25	0.5	0.5	0.5	0.5	0.5	0.5	0.5	0.5	0	0.25	0.5	0.5	0.5	0.5
2	0	0.25	0.5	0.5	0.5	0	0.25	0.25	0.25	0.5	0.25	0.25	0.25	0.25	0.25	0.25	0.25	0.25	0.25	0.25	0.25	0.25	0.25	0.25	0.25
2	0	5	0.5	0.5	0.25	0.25	0.5	0.5	0.75	0.75	5	0.25	0.25	0.25	0.25	0.25	0.5	0.5	0.25	0.5	0.25	0.25	0.5	0.5	0
2	0	0.25	0.5	0.5	0.5	0.5	0.5	0.5	0.5	0.5	0.5	0.5	0.5	0.5	0.5	0.5	0.5	0.5	0.5	0.5	0.5	0.5	0.5	0.5	0.5
2	0	0.25	0.25	0.25	0.25	0.25	0.5	0.25	0.25	0.25	0.5	0.25	0.25	0.25	0.25	0.25	0.25	0.25	0.25	0	0.25	0.5	0.25	0.25	0.25
2	0	1	0.75	0.5	0.5	0	0	0	0	0	0	0	0	0	0	0.5	0.5	0.5	0.5	0.5	0.5	0.25	0.75	0.75	0.5
2	0	0.25	0.5	0.5	0.5	0.5	0.5	0.5	0.5	0.5	0.5	0.5	0.5	0.5	0.5	0.5	0.5	0.5	0.5	0.5	0.5	0.5	0.5	0.5	0.5
2	0	0	0.5	0.5	0.5	0.5	0.5	0.5	0.5	0.5	0.5	0.5	0.5	0.5	0.5	0.5	0.5	0.5	0.5	0.5	0.5	0.5	0.5	0.5	0.5
1	0.25	0	0.25	0	0	0	0	0	0	0	0	0	0	0	0	0	0	0	0	0	0	0	0	0	0
2	0	0.5	0.5	0.5	0.25	0.5	0	0.25	0.25	0.25	0.25	0.25	0.25	0.25	0.25	0.25	0.25	0.25	0.25	0.25	0.25	0	0	0	0
2	0	0	0	0	0	0	0	0	0	0.75	0	0	0.75	0.5	0.25	0	0.25	0	0	0	0	0.75	0.75	0	0
2	0	0.25	0.5	0.5	0.5	0.5	0.5	0.5	0.5	0.5	0.5	0.5	0.5	0.5	0.5	0.5	0.5	0.5	0.5	0.5	0.5	0.5	0.5	0.5	0.5
1	0	0.5	1	5	5	5	0	0.75	0.5	0.5	0.5	0.5	0.5	0.5	0.5	0.5	0.5	0.75	0.75	0.5	0.75	0.75	0.25	0	0
1	0	0	0	0	0	0.25	0.5	0.5	0	0.5	0	0.25	0.25	0	0	0	0	0	0	0	0	0	0	0	0
1	0	1	0.5	0.5	0.5	0.5	0.5	0.5	0.5	0.5	0.5	0.5	0.5	0.5	0.5	0.5	0.5	0.5	0.5	0.5	0.5	0.5	0.5	0.5	0.5
2	0	0.25	0.25	0.5	0.5	0.25	0.5	0.25	0.25	0.25	0.25	0.25	0.25	0.25	0.25	0.25	0.5	0.25	0.25	0.25	0.25	0.25	0.25	0.25	0.25
2	0	0	0.5	0.5	0.5	0.5	0.5	0.5	0.5	0.5	0.5	0.5	0.5	0.5	0.5	0.5	0.5	0.5	0.5	0.5	0.5	0.5	0.5	0.5	0.5
1	0	1	0.5	0.5	0.5	0.5	0.5	0.5	0.5	0.5	0.5	0.5	0.5	0.5	0.5	0.5	0.5	0.5	0.5	0.5	0.5	0.5	0.5	0.5	0.5
2	0	0	0.5	0.5	0.5	0.5	0.5	0.5	0.5	0.5	0.5	0.5	0.5	0.5	0.5	0.5	0.5	0.5	0.5	0.5	0.5	0.5	0.75	0.5	0.5
2	0	1	0.5	0.5	0.5	0.5	0.5	0.5	0.5	0.5	0.5	0.5	0	0.5	0	0.5	0.5	0.5	0.5	0.5	0.5	0.5	0.5	0.5	0.5
2	0	1	0.5	0.5	0.5	0.5	0.5	0.5	0.5	0.5	0.5	0.5	0.5	0.5	0.5	0.5	0.5	0.5	0.5	0.5	0.5	0.5	0.5	0.5	0.5
1	0	0	0	0	0	0	0	0	0	0	0	0	0	0	0	0	0	0	0	0	0	0	0	0	0
2	0	0.5	0.5	0.5	0.5	0.25	0	0	0	0	0	0	0	0	0	0	0	0	0	0	0	0	0	0	0
1	0	0	5	0.5	0.5	0.5	0.5	0.5	0	0	0	0	0	0.5	0	0.5	0.5	0.5	0.5	0	0	0.5	0.5	0.5	0.5
1	0	0	0.25	0	0	0.25	0.25	0.25	0.25	0.5	0	0	0.75	0.25	0.25	0.25	0.5	0.25	0.5	0.5	0.25	0.25	1	0.75	0.5
2	0.25	0.25	0	0.25	0.25	0.25	0.25	0	0	0	0	0	0	0	0	0.5	0	0	0	0	0	0	0	0.25	0
2	0	0.25	0.5	0.5	0.5	0.5	0.5	0.25	0.25	0.25	0	0.25	0.75	0.5	0.5	0.5	0.5	0.25	0.5	0.5	0.75	0.75	1	5	0.75
1	0.25	0.25	0.5	0.5	0.5	0.5	0.5	0.5	0.5	0.5	0.5	0.5	0.5	0.5	0.5	0.5	0.5	0.5	0.5	0.5	0.5	0.5	0.5	0.5	0.5
2	0	0.25	0	0	0	0	0	0	0	0	0	0	0	0	0	0	0.5	0	0	0	0	0	0.5	0.5	0.5
2	0	0.25	0.5	0.5	0.5	0.5	0.5	0.5	0.5	0	0	0	0.5	0.5	0.5	0.5	0.5	0.5	0.5	0.5	0.5	0.5	0.5	0.5	0.5
2	0	0.25	0.5	0.5	0.5	0.5	0.5	0.5	0.5	0.5	0.5	0.5	0.5	0.5	0.5	0.5	0.5	0.5	0.5	0.5	0.5	0.5	0.5	0.5	0.5
2	0	0.25	0.5	0.5	0.5	0.5	0.5	0.5	0.5	0.5	0.5	0.5	0.5	0.5	0.5	0.5	0.5	0.5	0.5	0.5	0.5	0.5	0.5	0.5	0.5
2	0.25	0.25	0.5	0.5	0.5	0.5	0.5	0.5	0.5	0.5	0.5	0.5	0.5	0.5	0.5	0.5	0.5	0.5	0.5	0.5	0.5	0.5	0.5	0.5	0.5
2	0	0.25	5	0	0.5	0	0	0	0	0.5	0	0	0.25	0.25	0.25	0.25	0.25	0.25	0.25	0.25	0.25	0.25	1	0.25	0.5
1	0	0	0.5	0.75	0.75	0.25	0.5	0.5	0.75	5	0.25	0.75	0.75	0.5	0.75	0.25	0.5	0.25	0.75	0.25	0.75	0.5	0.75	0.75	0.75
2	0.25	0.25	0.25	0	0	0	0	0	0	0	0	0	0	0	0	0	0	0	0	0	0	0	0	0	0
2	0	0.25	0	0.25	1	0.5	0	0	0	0	0	0	1	0	0	0	0	0	0	0	0.5	0.5	0.5	0.5	0.5
1	0	0.75	0.5	0.5	0.5	0.5	0.5	0.5	0.5	0.5	0.5	0.5	0.5	0.5	0.5	0.5	0.5	0.5	0.5	0.5	0.5	0.5	0.5	0.5	0.5
2	0	5	0.5	0.5	0.5	0.5	0.5	0.5	0.5	0.5	0.5	0.5	0.5	0.5	0.5	0.5	0.5	0.5	0.5	0.5	0.5	0.5	0.5	0.5	0.5
1	0	0.25	0.5	0.5	0.5	0.5	0.5	0.5	0.5	0.5	0.5	0.5	0.5	0.5	0.5	0.5	0.5	0.5	0.5	0.5	0.5	0.5	0.5	0.5	0.5
1	0	0.25	0.5	0	0	0.5	0.5	0	0	0	0	0	0.5	0	0	0	0	0	0	0	0	0	0	0	0
2	0	0.25	0.5	0.75	0.5	0.5	0.5	0.5	0.5	0.5	0.25	0.5	0.25	0.5	0.5	0.75	0.75	0.5	0.5	0.5	0.5	0.5	0.5	0.5	0.5
2	0	1	0.5	0.5	0.5	0.5	0.5	0.5	0.5	0.5	0.5	0.5	0.5	0.5	0.5	0.5	0.5	0.5	0.5	0.5	0.5	0.5	0.5	0.5	0.5
2	0	1	0.25	0.25	0.25	0	0	0	0	0.25	0	0	0	0	0	0	0	0.25	0.25	0	0	0	0	0	0
2	0	5	0.5	0.5	0.5	0.5	0.5	0.5	0.5	0.5	0.5	0.5	0.5	0.5	0.5	0.5	0.5	0.25	0.25	0.25	0.5	0.25	0.25	0.5	0.5
1	0	0	0.5	0.5	0.5	0.5	0.75	0.5	0.5	0.5	0.5	0.25	0.5	0.5	0.5	0.5	0.5	0.25	0.25	0.75	0.5	0.75	0.5	0.5	0.5
2	0	0.25	0.5	0.5	0.5	0.5	0.5	0.5	0.5	0.5	0.5	0.5	0.5	0.5	0.5	0.5	0.5	0.5	0.5	0.5	0.5	0.5	0.5	0.5	0.5
2	0	0.75	0.5	0.5	0.5	0.25	0.5	0.25	0.25	0.5	0.5	0.5	0.75	0.5	0.5	0.75	0.5	0.5	0.5	0.5	0.5	0.5	0.75	0.75	0.5
2	0	0.25	0.5	0	0	0	0	0	0	0	0	0	0.5	0	0	0	0	0	0	0	0	0	0	0	0
1	0	0.25	0.25	0	0	0	0	0	0	0	0	0	0	0	0	0	0	0	0	0	0	0	0.5	0	0
1	0	0	0.5	0.5	0.5	0.5	0.5	0.5	0.5	0.5	0.5	0.5	0.5	0.5	0.5	0.5	0.5	0.5	0.5	0.5	0.5	0.5	0.5	0.5	0.5
1	0.75	0	0	0	0	0	0	0	0	0	0	0	0	0	0	0	0	0	0	0	0	0	0	0	0
2	0	0.25	0.75	0.5	0.5	0.25	0.25	0.75	0.25	0.5	0.25	0.5	0.25	0.25	0.5	0.5	0.5	0.25	0.25	0.5	0.5	0.5	0.5	0.25	0.25
2	0	0	0.5	0.5	0.5	0.75	0.5	0.5	0.5	0.75	0.5	0.75	5	0.75	0.75	0.75	0.5	0.75	0.5	0.5	0.75	0.5	1	0.5	0.75
2	0	0.25	0.5	0.5	0.5	0.5	0.5	0.5	0.5	0.5	0.5	0.5	0.5	0.5	0.5	0.5	0.5	0.5	0.5	0.5	0.5	0.5	0.5	0.5	0.5
2	0	0.25	0.5	0.5	0.5	0.75	0.5	0.5	0.5	0.5	0.5	0.5	0.5	0.5	0.5	0.5	0.5	0.5	0.5	0.5	0.5	0.5	0.5	0.5	0.5
2	0	0.25	0.5	0.5	0.5	0.5	0.5	0.5	0.5	0.5	0.5	0.5	0.5	0.5	0.5	0.5	0.5	0.5	0.5	0.5	0.5	0.5	0.5	0.5	0.5
2	0	0.75	0.5	0.5	0.5	0.5	0.75	0.5	0.5	0.5	0.5	0.5	0.5	1	0.5	0.5	0.5	5	0.5	0.5	0.5	0.5	0.5	0.5	0.5
2	0	0.25	0.5	0.5	0.5	0	0.25	0	0	0	0	0	0	0	0	0	0	0	0	0	0	0	0	0	0
1	0	5	1	1	1	1	1	1	1	1	1	1	1	1	1	1	1	1	1	1	1	1	1	1	1
2	0	0.25	0.25	0.5	0.5	0.5	0.75	0.5	0.25	0.5	0.5	0.25	0.75	0.5	0.25	0.5	0.5	0.5	0.25	0.5	0.5	0.25	0.5	0.5	0.5
2	0	0.25	0.5	0.25	0	0	0	0	0	0	0	0	0	5	0	0.5	1	0	0.5	0	0.5	0.25	1	0	0.5
1	0	0.75	0	0	0	0	0	0	0	0	0	0	0	0	0	0	0	0	0	0	0	0	0	0	0
2	0	0.25	0.5	0.5	0.5	0	0.75	0.5	0.25	0.25	0.25	0.25	0.5	0.25	0.5	0.5	0.25	0.25	0.25	0.25	0.25	0.25	0.5	0.5	0.5
2	0	0.25	0.5	0.5	0.5	0.5	0.5	0.5	0.5	0.5	0.5	0.5	0.5	0.5	0.5	0.5	0.5	0.5	0.5	0.5	0.5	0.5	0.5	0.5	0.5
2	0	0.25	0.5	0.5	0.25	0.75	5	5	0.75	0.75	0.75	0.75	0.5	0.75	0.75	0.5	0.75	0.75	0.75	0.75	0.5	0.5	0.5	0.25	0.5
2	0	0	0.5	0	0	0	0	0	0	0	0	0	0.5	0	0	0	0	0	0	0	0	0	0.5	0.5	0.5
2	0	0.25	0	0.5	0	0.25	0.25	0	0	0.25	0	0	0	0	0	0	0	0	0	0	0	0	0	0	0
2	0	0.25	0.25	0	0	0	0	0	0	0	0	0	0	0	0	0	0	0.5	0	0	0.25	0	0	0	0
1	0	0.25	1	0.5	0.5	0.5	0.5	0.5	0.5	0.5	0.5	0.5	0.5	0.5	0.5	0.5	0.5	0.5	0.5	0.5	0.5	0.5	0.5	0.5	0.5
2	0	0.25	0.5	0.25	0.5	0	0.5	0	0.25	0.5	0	0	0	0	0	0.5	0.5	0	0.5	0.5	0.5	0.5	0.5	0.5	0.5
2	0.5	0.25	0.5	0.75	0.75	0.75	0.5	0.5	0.5	0.5	0.5	0.25	0.5	0.5	0.5	0.5	0.5	0.5	0.5	0.5	0.5	0.5	0.5	0.5	0.25
2	0	5	0.5	0.25	0.5	0.5	0.5	0.5	0.5	0.5	0.5	0.5	0.5	0.5	0.5	0.5	0.5	0.5	0.5	0.5	0.5	0.5	0.5	0.5	0.5
2	0	0.25	0.75	0.5	0.75	0.25	0.25	0.25	0.25	0	0	0	0.75	0	0	0.25	0.5	0.25	0.25	0.25	0.25	0.25	0.5	0.25	0.25
2	0	0.25	0.75	0.5	0.75	0.5	0.75	0.5	0.75	0.75	0.5	0.5	0.5	0.75	0.75	0.5	0.5	0.5	0.75	0.75	0.75	0.75	0.75	0.5	0.5
2	0	0	0.5	0.5	0.5	0.5	0.5	0.5	0.5	0.5	0.5	0.5	0.5	0.5	0.5	0.5	0.5	0.5	0.5	0.5	0.5	0.5	0.5	0.5	0.5
2	0	0.25	0.5	0.5	0.5	0.25	0.25	0.5	0.5	0.5	0.5	0.25	0.5	0.25	0.25	0.25	0.25	0.5	0.5	0.5	0.25	0.5	0.5	0.5	0.25
2	0	0.25	0.5	0	0.25	0.25	0.5	0.25	0.25	0.25	0.25	0.25	0.25	0.25	0.25	0.25	0.25	0.25	0.25	0.25	0.25	0.25	0.25	0.25	0.25
2	0	0	0.5	0.25	1	0.5	0.5	0.5	0.5	0.5	0.5	0.5	0.75	0.75	0.75	0.5	0.75	5	0.5	0.5	0.5	0.5	0.5	0.5	0.5
2	0	0	0.5	0.5	0.5	0.5	0.5	0.5	0.5	0.5	0.5	0.5	0.5	0.5	0.5	0.5	0.5	0.5	0.5	0.5	0.5	0.5	0.5	0.5	0.5
1	0	5	0.5	0.5	0.75	0	0.5	0	0	0.25	0	0	0	0	0	0.25	0.5	0	0	0	0	0	0	0.5	0
1	0	0.75	0.5	1	0.5	0.5	0.5	0.5	0.5	0.5	0.5	0.5	0.5	0.5	0.5	0.5	0.5	0.5	0.5	0.5	0.5	0.5	0.5	0.5	0.5
1	0	0.5	0	0	0.5	0.5	0.5	0.5	0.5	0.5	0.5	0.5	0.75	0.5	0.5	0.25	0.5	0.5	0.25	0.25	0.5	0.25	0.25	0.5	0.5
1	0	5	0.5	0.5	0.5	0.25	0.25	0.25	0.25	0.25	0.25	0.25	0.25	0.25	0	0.25	0.5	0.25	0.25	0.25	0.25	0.5	0.25	0.25	0.25
2	0.25	0.25	0.5	0.5	0.5	0.5	0.5	0.5	0.5	0.5	0.5	0.5	0.5	0.5	0.5	0.5	0.5	0.5	0.5	0.5	0.5	0.5	0.5	0.5	0.5
2	0	0.25	0.5	0.5	0.5	0.5	0.5	0.5	0.5	0.5	0.5	0.5	0.5	0.5	0.5	0.5	0.5	0.5	0.5	0.5	0.5	0.5	0.5	0.5	0.5
2	0	0.5	0.5	0.5	0.5	5	5	1	0.75	0.75	1	1	1	1	1	1	1	1	1	1	0.5	0.75	1	1	1
2	0	0.25	0.5	0.5	0.5	0.5	0.5	0.5	0.5	0.5	0.5	0.5	0.5	0.5	0.5	0.5	0.5	0.5	0.5	0.5	0.5	0.5	0.5	0.5	0.5
1	0	0	0	0.5	0.5	0	0	0	0	0	0	0	0	0	0	0	0	0	0	0	0	0	0	0	0
2	0	0	0	0	0	0	0	0	0	0	0	0	0	0	0	0	0	0	0	0	0	0	0	0	0
2	0	0.25	0.5	0.5	0.5	0.5	0.25	0	0	0.5	0	0.5	0.75	0.5	0.5	0.25	0.5	0.5	0.25	0.25	0.5	0.5	0.5	0.5	0.5
2	0	0.75	0.75	0.5	0.5	0.25	0.75	0.25	0.25	0.75	0.25	0	0.5	0.25	0	0.25	0.75	0.75	0.75	0.5	0.5	0.25	0.75	0.75	0.25
2	0	0	0	0	0	0	0	0	0	0	0	0	0	0	0	0	0	0	0	0	0	0	0	0	0
2	0	0.75	0.75	0.75	0.5	0.5	0.5	0.5	0.5	0.75	0.5	0.5	0.75	0.25	0.5	0	0	0	0.25	0	0.25	0.5	0.25	0.25	0.5
2	0	0.25	0.75	0.5	0.25	0.25	0.25	0.25	0.25	0.25	0.25	0.25	0.25	0.25	0.25	0.25	0.25	0.25	0.25	0.25	0.25	0.25	0.25	0.25	0.25
1	0.25	5	0.5	0.25	0.5	0.25	0.25	0	0.25	0.25	0.25	0.25	0.75	0.25	0.5	0.25	0.5	0.25	0.5	0.25	0.75	0.5	0.75	0.75	0.25
1	0.25	0.25	0.5	0.5	0.5	0.5	0.5	0.5	0.5	0.5	0.5	0.5	0.5	0.5	0.5	0.5	0.5	0.5	0.5	0.5	0.5	0.5	0.5	0.5	0.5
2	0.25	0.5	0.5	0.5	0.5	0.5	0.5	0.5	0.5	0.5	0.5	0.5	0.5	0.5	0.5	0.5	0.5	0.5	0.5	0.5	0.5	0.5	0.5	0.5	0.5
1	0	0.75	0.5	0.5	0.5	0.5	0.5	0.5	0.5	0.5	0.5	0.5	0.5	0.5	0.5	0.5	0.5	0.5	0.5	0.5	0.5	0.5	0.5	0.5	0.5
1	0.25	5	1	1	1	1	1	1	1	1	1	1	1	1	1	1	1	1	1	1	1	1	1	1	1
2	0	0	0.5	0.5	0.5	0.5	0.5	0.5	0.5	0.5	0.5	0.5	0.5	0.5	0.5	0.5	0.5	0.5	0.5	0.5	0.5	0.5	0.5	0.5	0.5
2	0.25	0.25	1	0.5	0.25	0.25	0	0	0.25	0.25	0.25	0.25	0.25	0.25	0.25	0.25	0.25	0.25	0	0	0	0	0	0	0
2	0	0.25	0.5	0.5	0.5	0.5	0.5	0.5	0.5	0.5	0.5	0.75	0.5	0.5	0.5	0.5	0.5	0.5	0.5	0	0.5	0.5	0.5	0	0
2	0.25	0.25	0	0	0	0	0	0	0	0	0	0	0	0	0	0	0	0	0	0	0	0	0	0	0
1	0	0.5	0.5	0.5	0.5	0.5	0.5	0.5	0.5	0.5	0.5	0.5	0.5	0.5	0.5	0.5	0.5	0.5	0.5	0.5	0.5	0.5	0.5	0.5	0.5
2	0.25	0.25	0.25	0.25	0	0	0.25	0.5	0.25	0.25	0.25	0.25	0.25	0.25	0.25	0	0	0	0	0	0	0	0	0	0
2	0	0.5	0	0	0.75	0.25	0.25	0	0	0	0	0	0	0	0.25	0	0	0	0	0.25	0	0	0.5	0	0.5
2	0	5	0.75	0.5	0.5	0.5	0.5	0.5	0.5	0.75	0.5	0.5	0.5	0.5	0.25	0.25	0.25	0.25	0.5	0.25	0.25	0.25	0.5	0.5	0.5
2	0.25	0.25	0.5	0.25	0.25	0	0.25	0	0.25	0.25	0	0	0	0.25	0	0	0.25	0	0	0	0.25	0	0	0.25	0
2	0	0.75	0.5	0.5	0.5	0.5	0.5	0.5	0.5	0.5	0.5	0.5	0.5	0.5	0.5	0.5	0.5	0.5	0.5	0.5	0.5	0.5	0.5	0.5	0.5
2	0	0.25	0.5	0.5	0.5	0.5	0.5	0.5	0.5	0.5	0.5	0.5	0.5	0.5	0.5	0.5	0.5	0.5	0.5	0.5	0.5	0.5	0.5	0.5	0.5
2	0	0.75	0.5	0.5	0.5	0.5	0.5	0.5	0.5	0.5	0.5	0.5	0.5	0.5	0.5	0.5	0.5	0.5	0.5	0.5	0.5	0.5	0.5	0.5	0.5
2	0	0.5	0.5	0.5	0.5	0.5	0.5	0.5	0.5	0.5	0.5	0.5	0.5	0.5	0.5	0.5	0.5	0.5	0.5	0.5	0.5	0.5	0.5	0.5	0.5
2	0.25	0	0.5	0	0	0.25	0	0	0	0.25	0	0	0	0	0	0	0	0	0	0	0	0	0	0	0
2	0	0.25	0.5	0.5	0.5	0.5	0.5	0.5	0.5	0.5	0.5	0.5	0.5	0.5	0.5	0.5	0.5	0.5	0.5	0.5	0.5	0.5	0.5	0.5	0.5
1	0	0	0.5	0.5	0.5	0.5	0.5	0.5	0.5	0.5	0.5	0.5	0.5	0.5	0.5	0.5	0.5	0.5	0.5	0.5	0.5	0.5	0.5	0.5	0.5
1	0.25	5	0.5	0.5	0.5	0.5	0.5	0.5	0.5	0.5	0.5	0.5	0.5	0.5	0.5	0.5	0.5	0.5	0.5	0.5	0.5	0.5	0.5	0.5	0.5
1	0.25	0.25	1	0.5	0	0	0.25	0	0	0.25	0	0	0	0	0	0	0	0.25	0.25	0.25	0.25	0	0.25	0.25	0
1	0	0	0.5	0.5	0.5	0.5	0.5	0.5	0.5	0.5	0.5	0.5	0.5	0.5	0.5	0.5	0.5	0.5	0.5	0.5	0.5	0.5	0.5	0.5	0.5
1	0	5	0.5	0.5	0.5	0.5	0.5	0.5	0.5	0.5	0.5	0.5	0.5	0.5	0.5	0.5	0.5	0.5	0.5	0.5	0.5	0.5	0.5	0.5	0.5
1	0	5	5	1	1	1	1	1	1	5	0	0	0	0	0	1	0	1	1	1	1	1	1	1	5
2	0.25	0.25	0.25	0.25	0.25	0.25	0.25	0.25	0.25	0.25	0.25	0.25	0.25	0.25	0	0.25	0.25	0.25	0.25	0.25	0.25	0.25	0.25	0.25	0.25
1	0	5	0	0	0.5	0.5	0.5	0.25	0.25	0.5	0.25	0.25	0.75	0.5	0.5	0.25	0.5	0.25	0.25	0.25	0.25	0.25	0.5	0.5	0.25
2	0	0.25	0	0	0	0	0.25	0.5	0.5	0.5	0.5	0.5	0.5	0.5	0.5	0.25	0	0	0	0	0.5	0.5	0.5	0.5	0.25
2	0	0.5	0.5	0	0.25	0.25	0.25	0.25	0.25	0.25	0.25	0.25	0.25	0.25	0.25	0.25	0.25	0.25	0.25	0.25	0.25	0.25	0.25	0.25	0.25
2	0	0.25	0	0	0	0	0	0	0	0	0	0	0	0	0	0	0	0	0	0	0	0	0	0	0
2	0	0.5	0.5	0.5	0.5	5	5	0.75	0.75	0.75	0.5	0.75	0.5	0.5	0.5	0.5	0.5	0.5	0.5	0.5	0.5	0.5	0.5	0.5	0.5
1	0	0	0.5	0.5	0.5	0.5	0	0	0	0.5	0	0	0.5	0	0	0.5	0.5	0.5	0.5	0.5	0.5	0.5	0.5	0.5	0
2	0	0.25	0.5	0.5	0.5	0.5	0.5	0.5	0.5	0.5	0.5	0.5	0.5	0.5	0.5	0.5	0.5	0.5	0.5	0.5	0.5	0.5	0.5	0.5	0.5
2	0	0.25	0.5	0.5	0.5	0.5	0.5	0.5	0.5	0.5	0.5	0.5	0.5	0.5	0.5	0.5	0.5	0.5	0.5	0.5	0.5	0.5	0.5	0.5	0.5
1	0	0	0	0	0.5	0	0	0	0	0	0	0	0.5	0	0	0.25	0	0	0	0	0	0	0	0	0
1	0	0	0.5	0.5	0.5	0.5	0.5	0.5	0.5	0.5	0.5	0.5	0.5	0.5	0.5	0.5	0.5	0.5	0.5	0.5	0.5	0.5	0.5	0.5	0.5
1	0	0	0.5	0.5	0.5	0.5	0.5	0.5	0.5	0.5	0.5	0.5	0.5	0.5	0.5	0.5	0.5	0.5	0.5	0.5	0.5	0.5	0.5	0.5	0.5
2	0	0.25	0.5	0.5	0.5	0.25	0	0	0	0	0	0	0	0	0	0	0	0	0	0	0	0	0.5	0	0.25
1	0	0	0.5	0.5	0.5	0.5	0.5	0.5	0.5	0.5	0.5	0.5	0.5	0.5	0.5	0.5	0.5	0.5	0.5	0.5	0.5	0.5	0.5	0.5	0.5
2	0	0	0.5	0.5	0.75	1	1	1	1	0.75	0.25	0.75	1	1	1	0.75	1	1	1	1	1	0.75	5	5	0
2	0.25	0.25	0.5	0.5	0.5	0.25	0.25	0.25	0.25	0.25	0.25	0	0.5	0.25	0.25	0.25	0.25	0.25	0	0	0	0.25	0	0.25	0
2	0.25	0.25	0.5	0.25	0.5	0.5	0.5	0.25	0.25	0.5	0.5	0.5	0.5	0.5	0.5	0.25	0.25	0.25	0.25	0.5	0.5	0.5	0.5	0.25	0.25
2	0.25	0	0.5	0.5	0.5	0.5	0.5	0.5	0.5	0.5	0.5	0.5	0.5	0.5	0.75	0.5	0.5	0.5	0.5	0.5	0.5	0.5	0.5	0.5	0.5
1	0	0	0.25	0.25	0	0.25	0.25	0.25	0.25	0.5	0.5	0.75	0.25	0.25	0.25	0.5	0	0.25	0.25	0.5	0.5	0.5	0.5	0.5	0.5
2	0	0.5	0.5	0.5	0.5	0.5	0.5	0.5	0.5	0.5	0.5	0.5	0.5	0.5	0.5	0.5	0.5	0.5	0.5	0.5	0.5	0.5	0.5	0.5	0.5
2	0.25	0	0.25	0.25	0.25	0.25	0.5	0.25	0.25	0.5	0	0	0	0.25	0	0	0.25	0.25	0.25	0	0	0.25	0	0.25	0
1	0.25	0.25	0.5	0.5	0.75	0.25	5	0.5	0.5	0.5	0.5	0.75	0.25	0.5	0.25	0.5	0.5	0.5	0.5	0.5	0.5	0.5	0.25	0.5	0.25
2	0.25	1	0.5	0.5	0.5	5	0.5	0	1	0.5	0.25	0.5	0.5	0.5	0.5	0.5	0.5	0.5	0.75	0.5	0.75	0.5	0.5	0.5	0.5
2	0.25	0.75	0.5	0.5	0.25	0.75	0.75	0.75	0.75	0.5	0.75	0.5	0.5	0.5	0.5	0.5	0.5	0.5	0.5	0.5	0.5	0.5	0.25	0.25	0.5
2	0.25	1	0.5	0.5	0.5	0.5	0.5	0.5	0.5	0.5	0.5	0.5	0.5	0.5	0.5	0.5	0.5	0.5	0.5	0.5	0.5	0.5	0.5	0.5	0.5
2	0.25	0.25	0.5	0.5	0.5	0.5	0.5	0.5	0.5	0.5	0.5	0.5	0.5	0.5	0.5	0.5	0.5	0.5	0.5	0.5	0.5	0.5	0.5	0.5	0.5
1	0	0.25	0.5	0.5	0.5	0.5	0.5	0.5	0.5	0.5	0.5	0.5	0.5	0.5	0.5	0.5	0.5	0.5	0.5	0.5	0.5	0.5	0.5	0.5	0.5
1	0.25	0.25	0.5	0.5	0.5	0.5	0.5	0.25	0.25	0.25	0.25	0.25	0.25	0.25	0.25	0.25	0.25	0.25	0.25	0.25	0.25	0.25	0.25	0.25	0.25
2	0.25	0.25	0	0	0	0	0	0	0	0	0	0	0	0	0	0.5	0.5	0.5	0.5	0.25	0.75	0.5	1	0.5	0.5
2	0	0.25	0.25	0	0	0	0.5	0.25	0.25	0.5	0.25	0	0.5	0.25	0.25	0.25	0.5	0.25	0	0.25	0.25	0.5	0.25	0.25	0.25
2	0	0.25	0.5	0	0.25	0	0	0	0	0	0	0	0	0	0	0	0	0	0	0	0	0	0	0.5	0.5
2	0	0.25	0.5	0	0	0.5	5	0.75	1	0.5	0.25	0.5	0.75	0.5	0.75	0.25	0.25	0.5	0.25	0.25	0.75	0.25	5	0	0.5
2	0	0.75	0.5	0.25	0.5	0.25	0.25	0.5	0.5	0.5	0.5	0.5	0.5	0.5	0.5	0.5	0.5	0.5	0.5	0.5	0.5	0.5	0.5	0.5	0.5
2	0	0.75	0.5	0.5	0.5	0.5	0.5	0.5	0.5	0.5	0.5	0.5	0.5	0.5	0.5	0.5	0.5	0.5	0.5	0.5	0.5	0.5	0.5	0.5	0.5
2	0	0.5	0.75	0.5	0.5	0.25	0.25	0	0	0	0	0	0	0	0	0	0.75	0.25	1	0.25	0	0.5	0	0	0.75
1	0.25	0	0.5	0.5	0.5	0.5	0.5	0.5	0.5	0.5	0.5	0.5	0.5	0.5	0.5	0.5	0.5	0.5	0.5	0.5	0.5	0.5	0.5	0.5	0.5
1	0.25	0.25	0.5	0.25	0.5	0.25	0.25	0.25	0.25	0.25	0.25	0.25	0.25	0.25	0.25	0.25	0.25	0.25	0.25	0.25	0.25	0.25	0.5	0.25	0.25
1	0	0.25	0.5	1	5	5	0.5	0.5	0.5	0.5	0.5	0.5	0.5	0.5	0.5	0.5	0.5	0.5	0.5	0.5	0.5	0.5	0.5	0.5	0.5
2	0.25	0.75	0.5	0.5	0.25	0.75	0.5	0	0.25	0.25	0.25	0.25	0.25	0.25	0.5	0.25	0.25	0.25	0.25	0.25	0.5	0.25	0.25	0.25	0.25
1	0.25	0	0.5	0.25	5	0.75	5	0.5	0.75	1	0.25	0.5	0.75	0.25	0.25	0.25	0.25	0.25	0.25	0.25	0.25	0.25	0.25	0.5	0.5
2	0.25	0.25	0	0	0	0	0	0	0	0	0	0	0	0	0	0	0	0	0	0	0	0	0	0	0
