# Supplementary material for: Unravelling the Mechanisms of Student Negative Emotions in Technology-Mediated Intermittent Dropout: A Mixed-Methods fsQCA Study
Source: Research Square preprint supplement (doi:10.21203/rs.3.rs-6971678/v1), 2025-09-08
Supplement: Supplementary file 3 [file ed54eb64090ad4856d6f34a7.docx]

# Semi-Structured Interview Protocol: Exploring Emotional Mechanisms Underlying Intermittent Dropout in -Technology-Assisted Learning

**Introduction (to be read aloud):**
Thank you for agreeing to participate in this study. The purpose of this interview is to understand your experiences with technology-assisted learning and the emotions that may influence your engagement or disengagement. There are no right or wrong answers—just your honest thoughts. Your identity will remain confidential.

**Section A: Background and Experience**

1. **Can you briefly describe your typical use of educational technology (e.g., Rain Classroom, MOOC platforms, learning management systems)?**
   *(Probing: frequency of use, types of tools used, context of use—classroom or self-study)*
2. **Have you ever experienced interruptions in your use of these tools?**
   *(Probing: What did the interruption look like—complete stop, reduced use, or selective avoidance of functions?)*
3. **Can you recall a time when you intentionally avoided using a specific feature or tool? Why?**

**Section B: Emotional Triggers and Responses**

1. **In your experience, have emotional factors influenced your motivation or willingness to continue using educational technologies? If yes, in what way?**
2. **Let me go through a few emotions. Please let me know if you have felt these during technology-assisted learning, and what triggered them.**
   - **Burnout:** Feeling mentally or physically exhausted due to too much content or fast pacing.
     *(Follow-up: Did this ever lead you to disengage or take a break?)*
   - **Anxiety:** For example, feeling overwhelmed by deadlines, peer performance, or uncompleted tasks.
   - **Frustration:** Caused by technical issues, poor platform design, or lack of clarity in assignments.
   - **Isolation:** Feeling disconnected due to lack of interaction or instructor feedback.
   - **Jealousy or inadequacy:** Comparing your performance to others (e.g., classmates receiving praise, high scores).
   - **Stress from life roles:** Juggling work, family responsibilities, or health while learning.
3. **When you felt these emotions, how did you usually respond?**
   *(Probing: Avoided the platform? Took a break? Tried to seek help? Completed assignments late?)*

**Section C: Coping and Re-engagement**

1. **Were there any strategies that helped you overcome these emotions and return to learning?**
   *(Probing: self-regulation, external support, peer encouragement, instructor assistance)*
2. **Can you describe one particular situation where you almost dropped out but decided to stay? What made the difference?**
3. **What kind of support—technical, emotional, instructional—do you wish had been available when you were struggling?**

**Closing Remarks:**
Thank you very much for your insights. Your responses will help us better understand how to design emotionally responsive learning environments and support systems.
